# Supplementary material for: Prenylated phenylpropanoids with unprecedented skeletons from Illicium burmanicum
Source: Royal Society of Chemistry journal article supplement (doi:10.1039/c7ra01143a), 2017-01-01
Supplement: c7ra01143a1.pdf [file c7ra01143a1.pdf]

Supplementary Information

**Prenylated phenylpropanoids with unprecedented skeletons from  
*Illicium burmanicum***

Xinhui Tian,<sup>a,⊥</sup> Xin Guo,<sup>a,⊥</sup> Zhiguo Zhuo,<sup>b</sup> Rentao Zeng,<sup>b</sup> Xin Fang,<sup>b</sup> Xike Xu,<sup>b</sup>  
Huiliang Li,<sup>b</sup> Yunheng Shen<sup>b</sup> and Weidong Zhang<sup>abc\*</sup>

[a] Interdisciplinary Science Research Institute, Shanghai University of Traditional Chinese Medicine, Shanghai 201203, P. R. China

wdzhangy@hotmail.com, <http://www.shutcm.edu.cn/>

[b] Department of Phytochemistry, School of Pharmacy, Second Military Medical University, Shanghai 200433, P. R. China

[c] Innovative Research Center of Traditional Chinese Medicine, Shanghai Institute of Pharmaceutical Industry, Shanghai 201204, P. R. China

⊥ These authors contributed equally to this work.

\* Corresponding authors at: Interdisciplinary Science Research Institute, Shanghai University of Traditional Chinese Medicine, Shanghai 201203, PR China (W.-D. Zhang). Tel.: +86 21 8187 1244.

*E-mail address:* wdzhangy@hotmail.com

## Contents

**Figure S1** HRESIMS spectrum of compound **1**

**Figure S2** CD spectrum of compound **1**

**Figure S3**  $^1\text{H}$  NMR spectrum of compound **1** (500 MHz,  $\text{CDCl}_3$ )

**Figure S4**  $^{13}\text{C}$  NMR spectrum of compound **1** (125 MHz,  $\text{CDCl}_3$ )

**Figure S5** DEPT NMR spectrum of compound **1** (125 MHz,  $\text{CDCl}_3$ )

**Figure S6**  $^1\text{H}$ - $^1\text{H}$  COSY NMR spectrum of compound **1** (500 MHz,  $\text{CDCl}_3$ )

**Figure S7** HSQC NMR spectrum of compound **1** (500 MHz,  $\text{CDCl}_3$ )

**Figure S8** HMBC NMR spectrum of compound **1** (500 MHz,  $\text{CDCl}_3$ )

**Figure S9** Expanded HMBC NMR spectrum of compound **1** (500 MHz,  $\text{CDCl}_3$ )

**Figure S10** NOESY NMR spectrum of compound **1** (500 MHz,  $\text{CDCl}_3$ )

**Figure S11** Expanded NOESY NMR spectrum of compound **1** (500 MHz,  $\text{CDCl}_3$ )

**Figure S12** Expanded NOESY NMR spectrum of compound **1** (500 MHz,  $\text{CDCl}_3$ )

**Figure S13** HREIMS spectrum of compound **2**

**Figure S14** CD spectrum of compound **2**

**Figure S15**  $^1\text{H}$  NMR spectrum of compound **2** (500 MHz,  $\text{CDCl}_3$ )

**Figure S16**  $^{13}\text{C}$  NMR spectrum of compound **2** (125 MHz,  $\text{CDCl}_3$ )

**Figure S17** DEPT NMR spectrum of compound **2** (125 MHz,  $\text{CDCl}_3$ )

**Figure S18**  $^1\text{H}$ - $^1\text{H}$  COSY NMR spectrum of compound **2** (500 MHz,  $\text{CDCl}_3$ )

**Figure S19** HSQC NMR spectrum of compound **2** (500 MHz,  $\text{CDCl}_3$ )

**Figure S20** HMBC NMR spectrum of compound **2** (500 MHz,  $\text{CDCl}_3$ )

**Figure S21** NOESY NMR spectrum of compound **2** (500 MHz,  $\text{CDCl}_3$ )

**Figure S22** HRESIMS spectrum of compound **3**

**Figure S23** CD spectrum of compound **3**

**Figure S24**  $^1\text{H}$  NMR spectrum of compound **3** (500 MHz,  $\text{CDCl}_3$ )

**Figure S25**  $^{13}\text{C}$  NMR spectrum of compound **3** (125 MHz,  $\text{CDCl}_3$ )

**Figure S26** DEPT NMR spectrum of compound **3** (125 MHz,  $\text{CDCl}_3$ )

**Figure S27**  $^1\text{H}$ - $^1\text{H}$  COSY NMR spectrum of compound **3** (500 MHz,  $\text{CDCl}_3$ )

**Figure S28** HSQC NMR spectrum of compound **3** (500 MHz,  $\text{CDCl}_3$ )

**Figure S29** HMBC NMR spectrum of compound **3** (500 MHz,  $\text{CDCl}_3$ )

**Figure S30** NOESY NMR spectrum of compound **3** (500 MHz,  $\text{CDCl}_3$ )

**Figure S31** HRESIMS spectrum of compound **4**

**Figure S32** CD spectrum of compound **4**

**Figure S33**  $^1\text{H}$  NMR spectrum of compound **4** (500 MHz,  $\text{CDCl}_3$ )

**Figure S34**  $^{13}\text{C}$  NMR spectrum of compound **4** (125 MHz,  $\text{CDCl}_3$ )

**Figure S35** DEPT NMR spectrum of compound **4** (125 MHz,  $\text{CDCl}_3$ )

**Figure S36**  $^1\text{H}$ - $^1\text{H}$  COSY NMR spectrum of compound **4** (500 MHz,  $\text{CDCl}_3$ )

**Figure S37** HSQC NMR spectrum of compound **4** (500 MHz,  $\text{CDCl}_3$ )

**Figure S38** HMBC NMR spectrum of compound **4** (500 MHz,  $\text{CDCl}_3$ )

**Figure S39** NOESY NMR spectrum of compound **4** (500 MHz,  $\text{CDCl}_3$ )

**Figure S40** HRESIMS spectrum of compound **5**

**Figure S41**  $^1\text{H}$  NMR spectrum of compound **5** (500 MHz,  $\text{CDCl}_3$ )

**Figure S42**  $^{13}\text{C}$  NMR spectrum of compound **5** (125 MHz,  $\text{CDCl}_3$ )

**Figure S43** DEPT NMR spectrum of compound **5** (125 MHz,  $\text{CDCl}_3$ )

**Figure S44**  $^1\text{H}$ - $^1\text{H}$  COSY NMR spectrum of compound **5** (500 MHz,  $\text{CDCl}_3$ )

**Figure S45** HSQC NMR spectrum of compound **5** (500 MHz,  $\text{CDCl}_3$ )

**Figure S46** HMBC NMR spectrum of compound **5** (500 MHz,  $\text{CDCl}_3$ )

**Figure S47** NOESY NMR spectrum of compound **5** (500 MHz,  $\text{CDCl}_3$ )

**Figure S48** ESIMS spectrum of compound **7**

**Figure S49**  $^1\text{H}$  NMR spectrum of compound **7**

**Figure S50**  $^{13}\text{C}$  NMR spectrum of compound **7**

**Figure S51** DEPT spectrum of compound **7**

**Figure S52** HSQC spectrum of compound **7**

**Figure S53** HMBC spectrum of compound **7**

**Figure S54** NOESY spectrum of compound **7**

## **Experimental Section**

**Figure S55** HPLC spectrum of the extract, compounds **3** ( $t_{\text{R}} = 26.0$  min) and **5** ( $t_{\text{R}} = 38.2$  min)

**Figure S56** Base peak and extracted ion chromatogram of the methanol extract at 26.0 min (Compound **3**:  $m/z = 347$   $[\text{M} + \text{Na}]^+$ )

**Figure S57** Base peak and extracted ion chromatogram of the methanol extract at 38.2 min (Compound **5**:  $m/z = 337$   $[\text{M} - \text{H}]^-$ ).

**Figure S1** HRESIMS spectrum of compound **1**

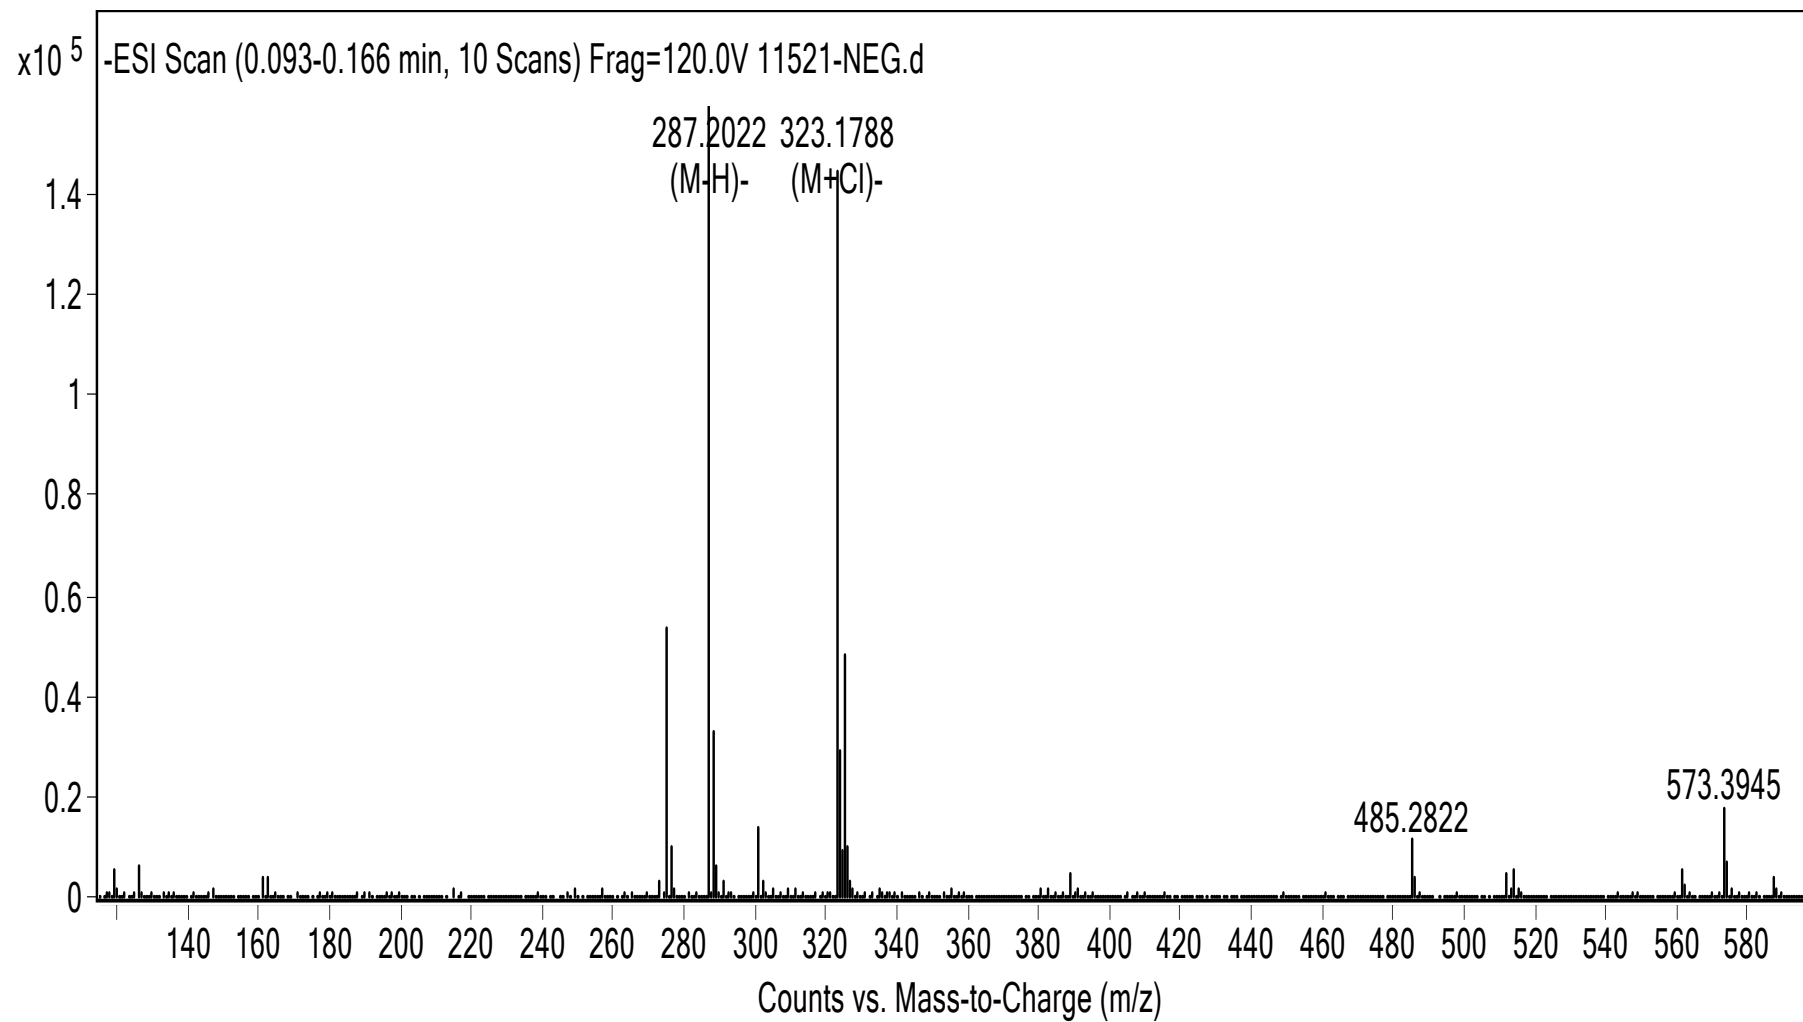

**Figure S2** CD spectrum of compound **1**

File : 1152100183.dax  
Property : Circular Dichroism

Thursday, January 21, 2016

1

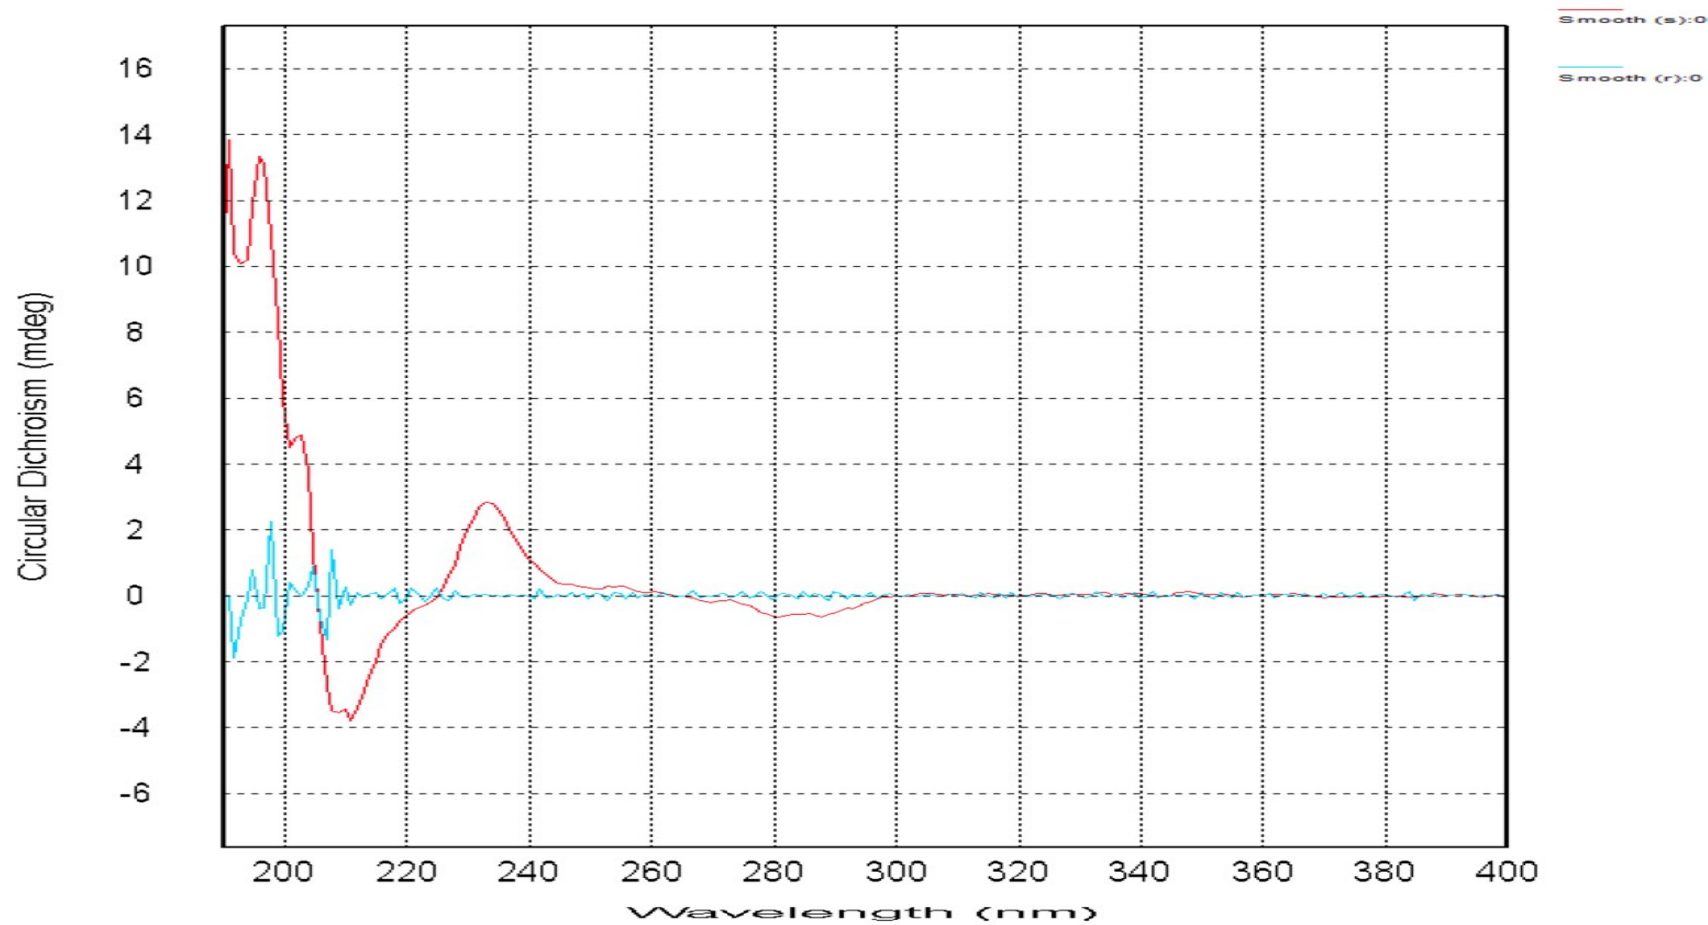

**Figure S3**  $^1\text{H}$  NMR spectrum of compound **1** (500 MHz,  $\text{CDCl}_3$ )

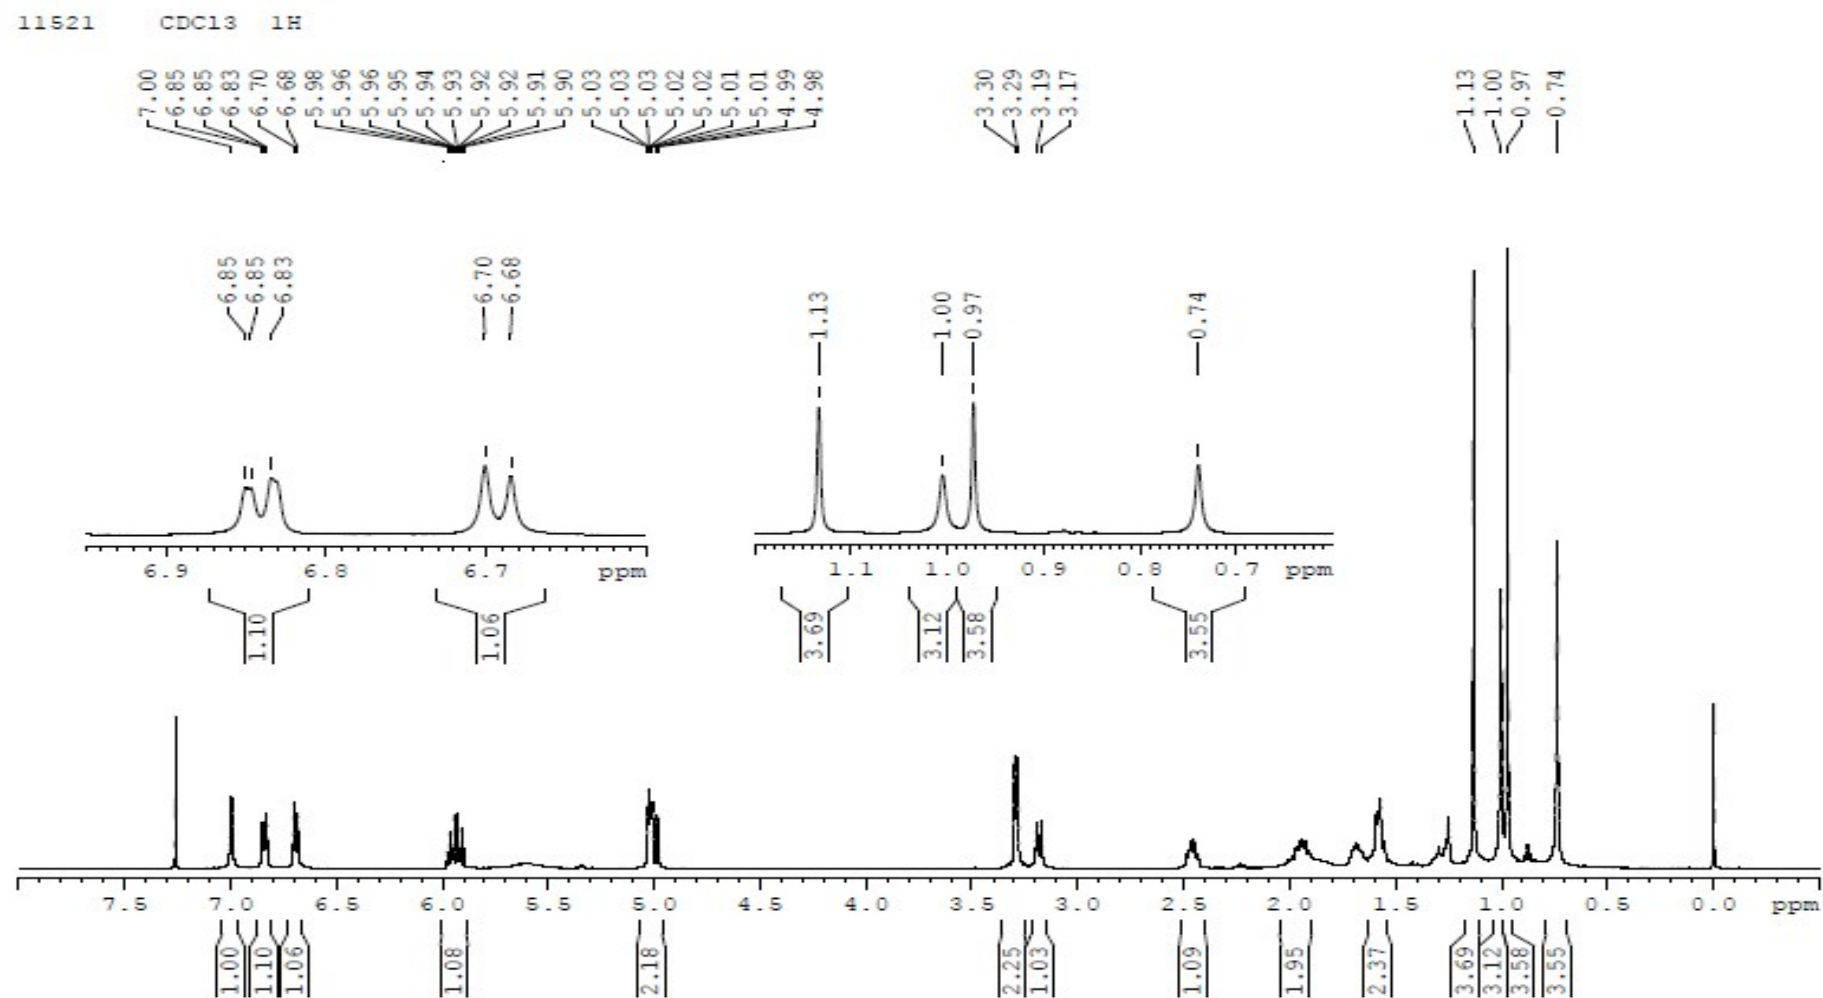

**Figure S4**  $^{13}\text{C}$  NMR spectrum of compound **1** (125 MHz,  $\text{CDCl}_3$ )

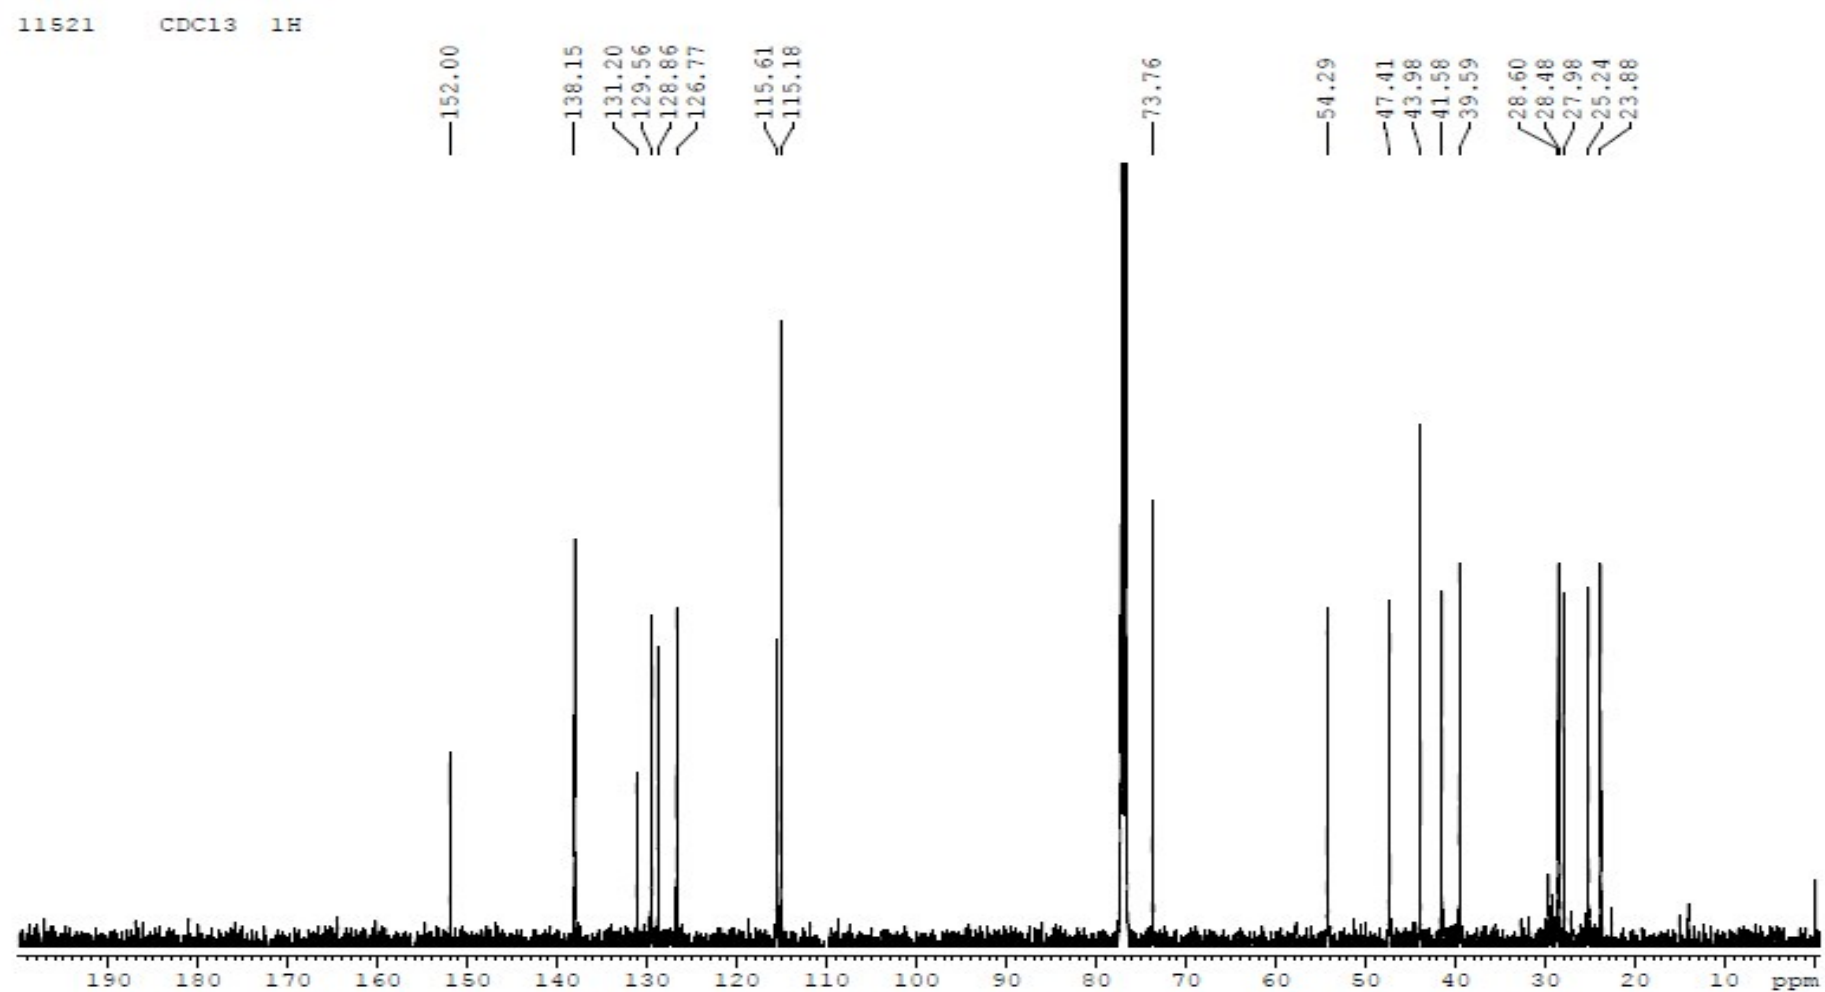

**Figure S5** DEPT NMR spectrum of compound **1** (125 MHz, CDCl<sub>3</sub>)

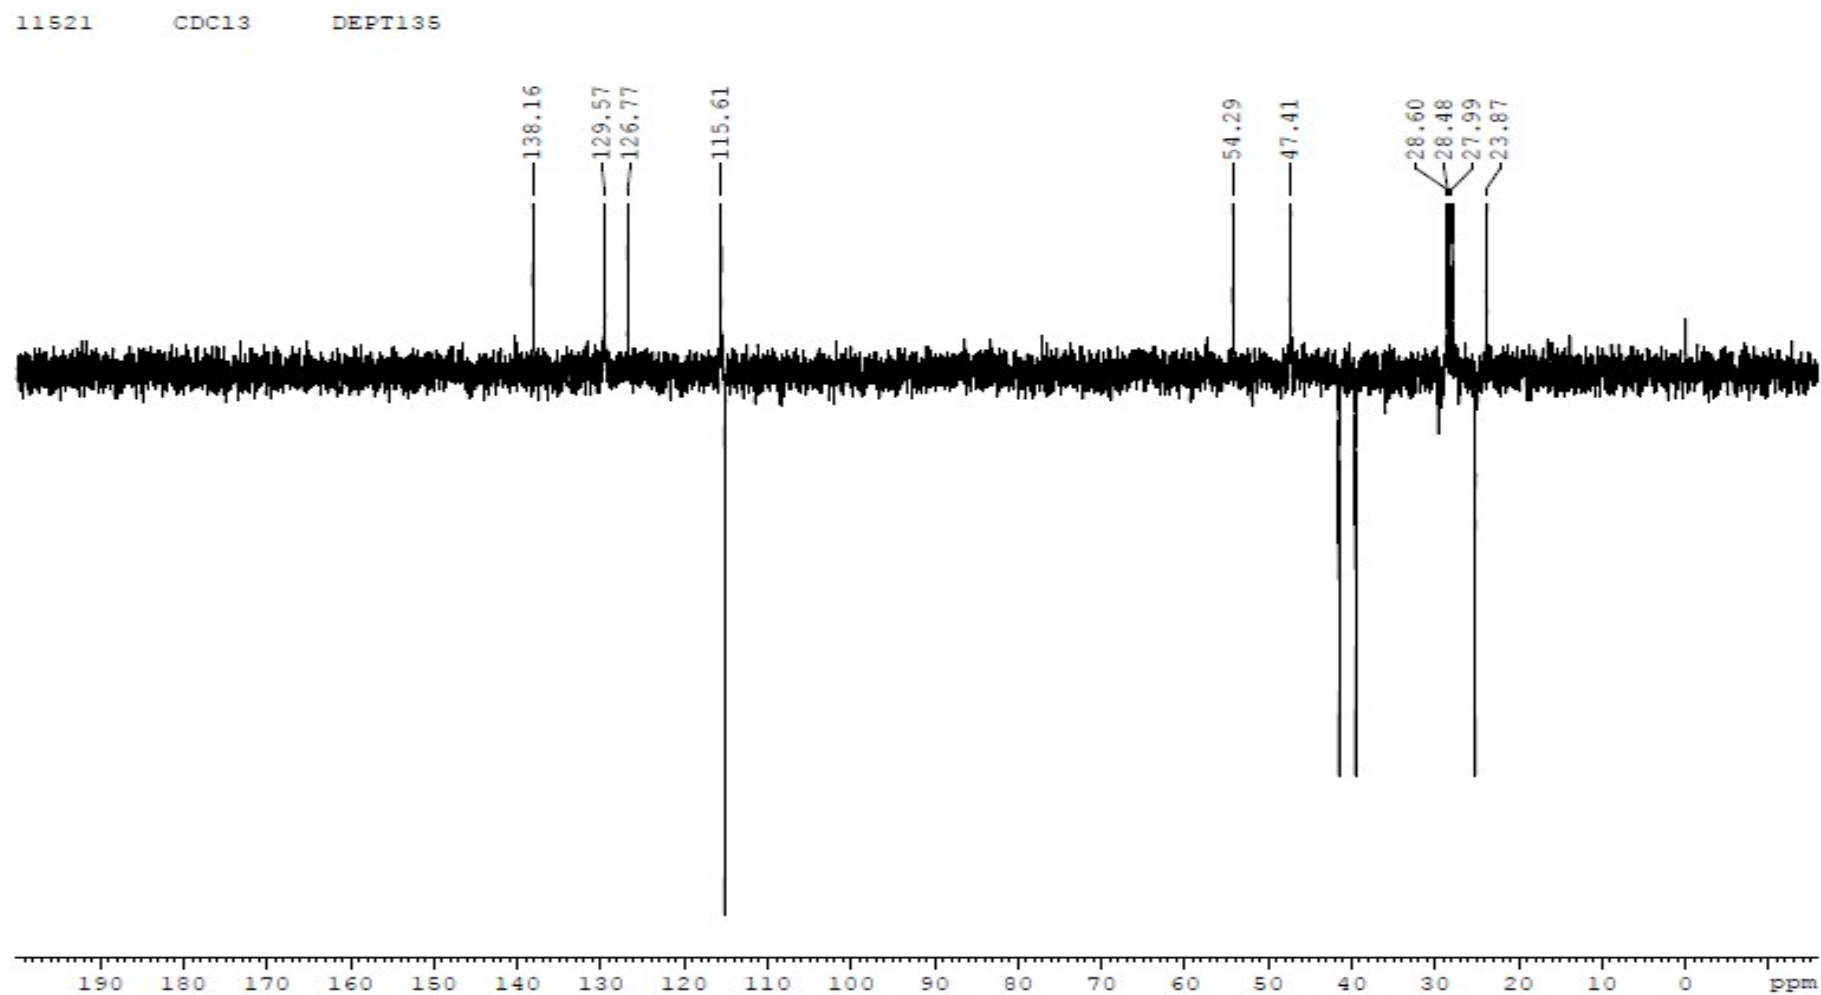



**Figure S6**  $^1\text{H}$ - $^1\text{H}$  COSY NMR spectrum of compound **1** (500 MHz,  $\text{CDCl}_3$ )

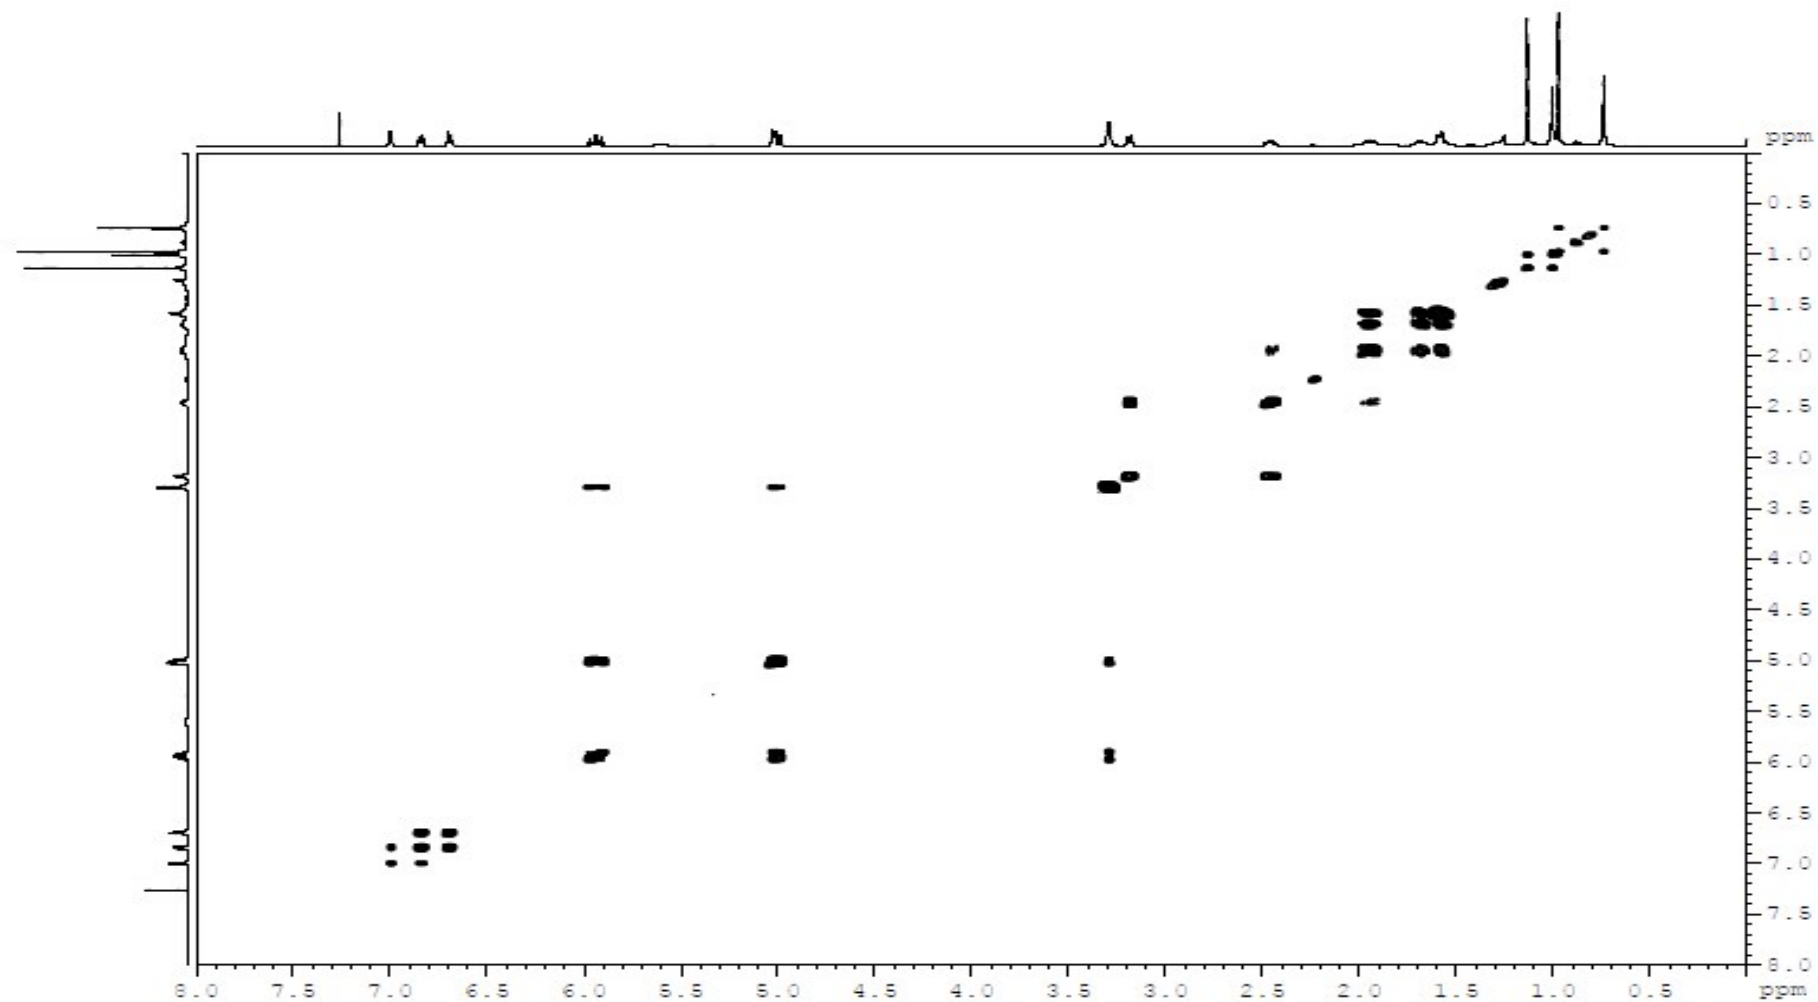

**Figure S7** HSQC NMR spectrum of compound **1** (500 MHz, CDCl<sub>3</sub>)

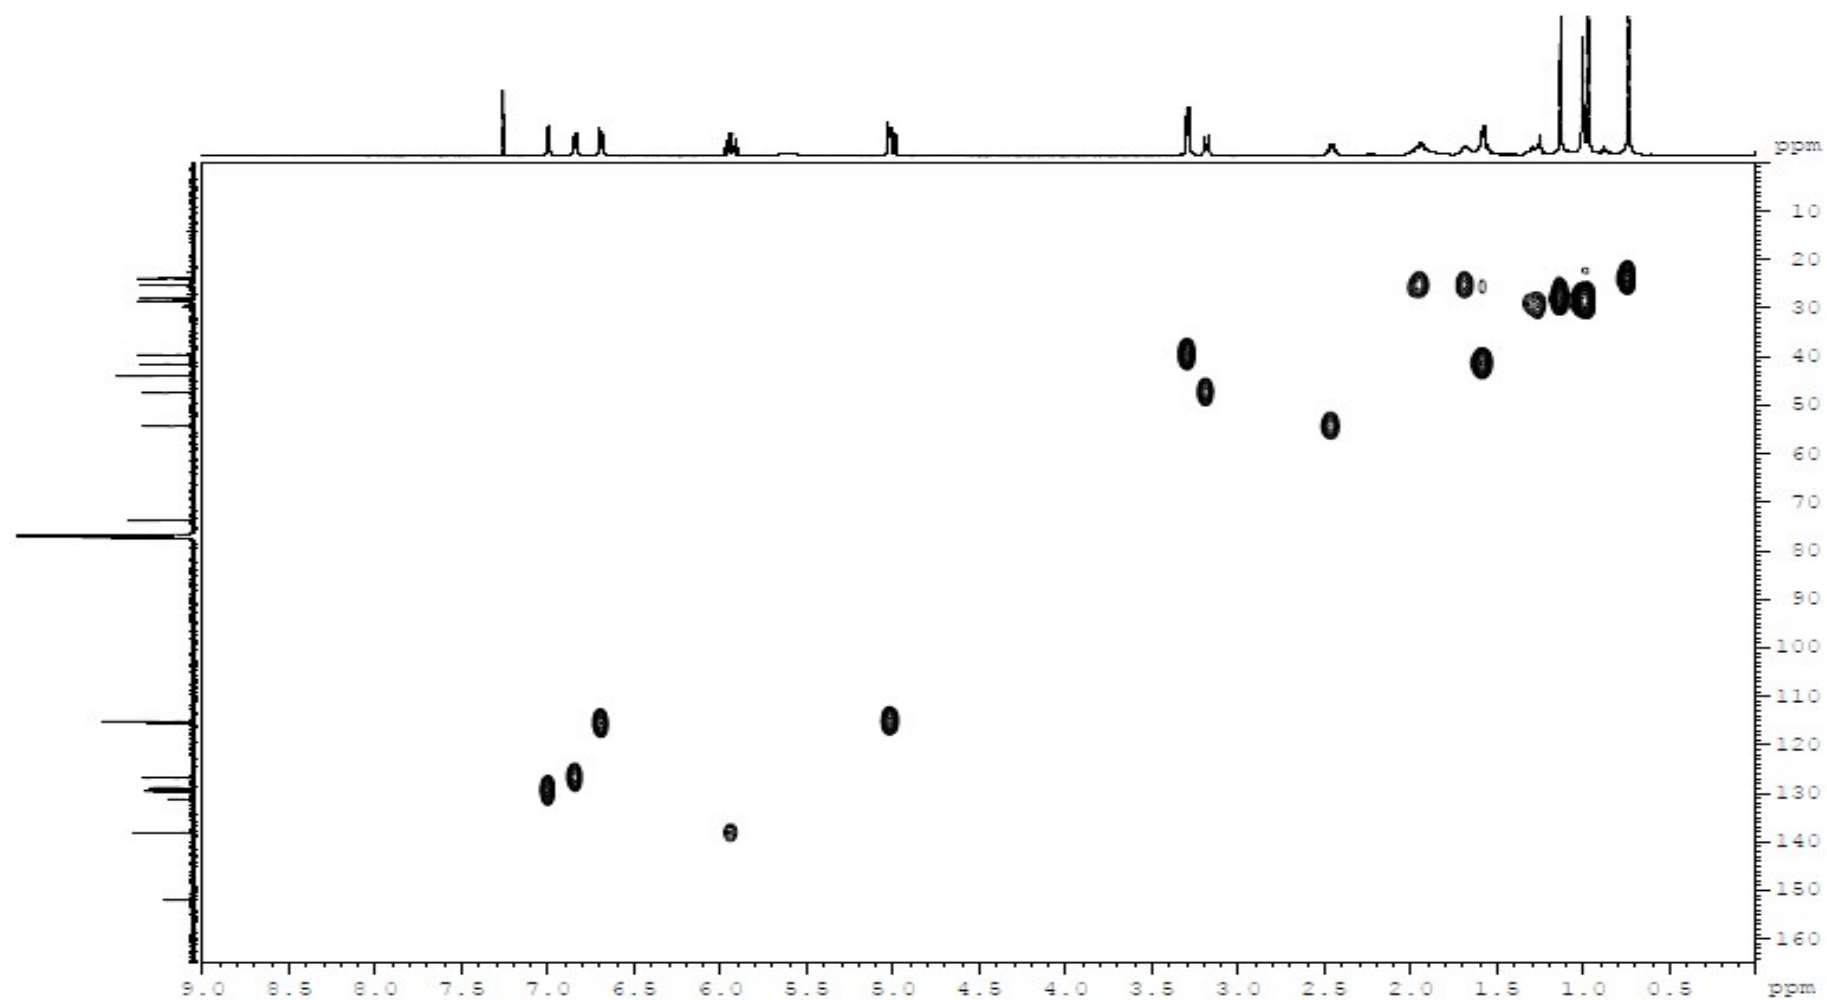

**Figure S8** HMBC NMR spectrum of compound **1** (500 MHz, CDCl<sub>3</sub>)

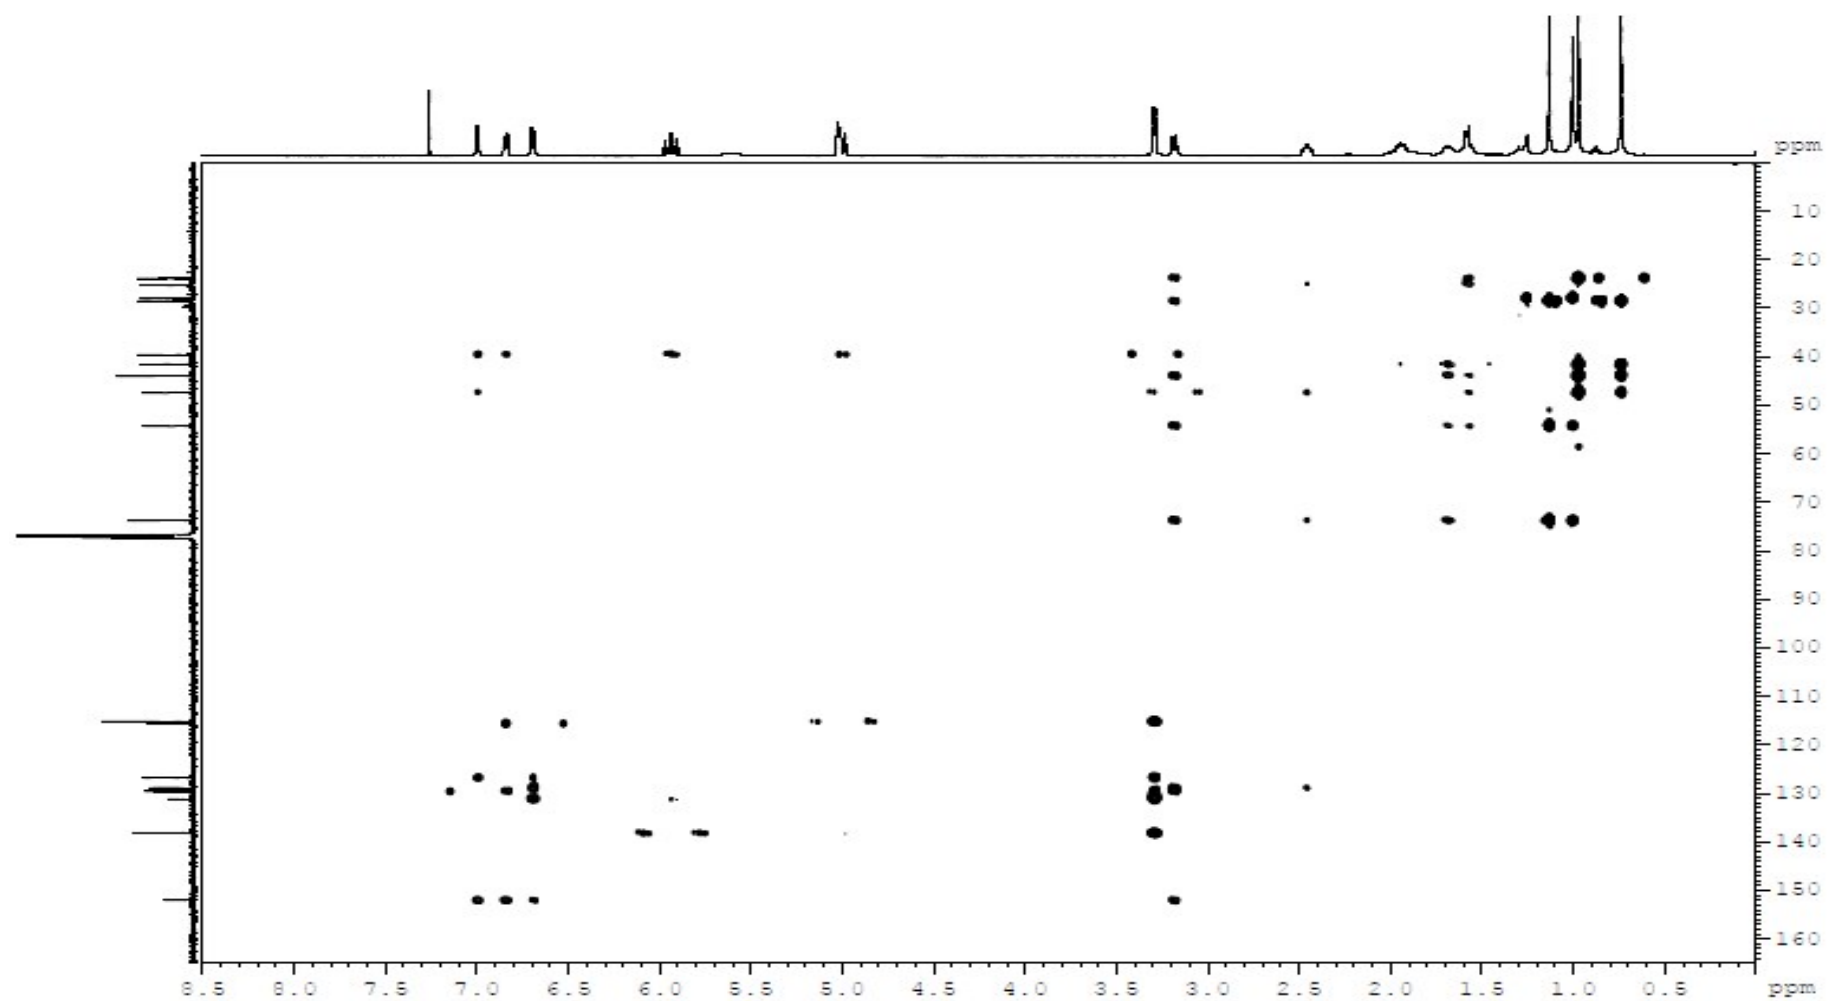

**Figure S9** Expanded HMBC NMR spectrum of compound **1** (500 MHz, CDCl<sub>3</sub>)

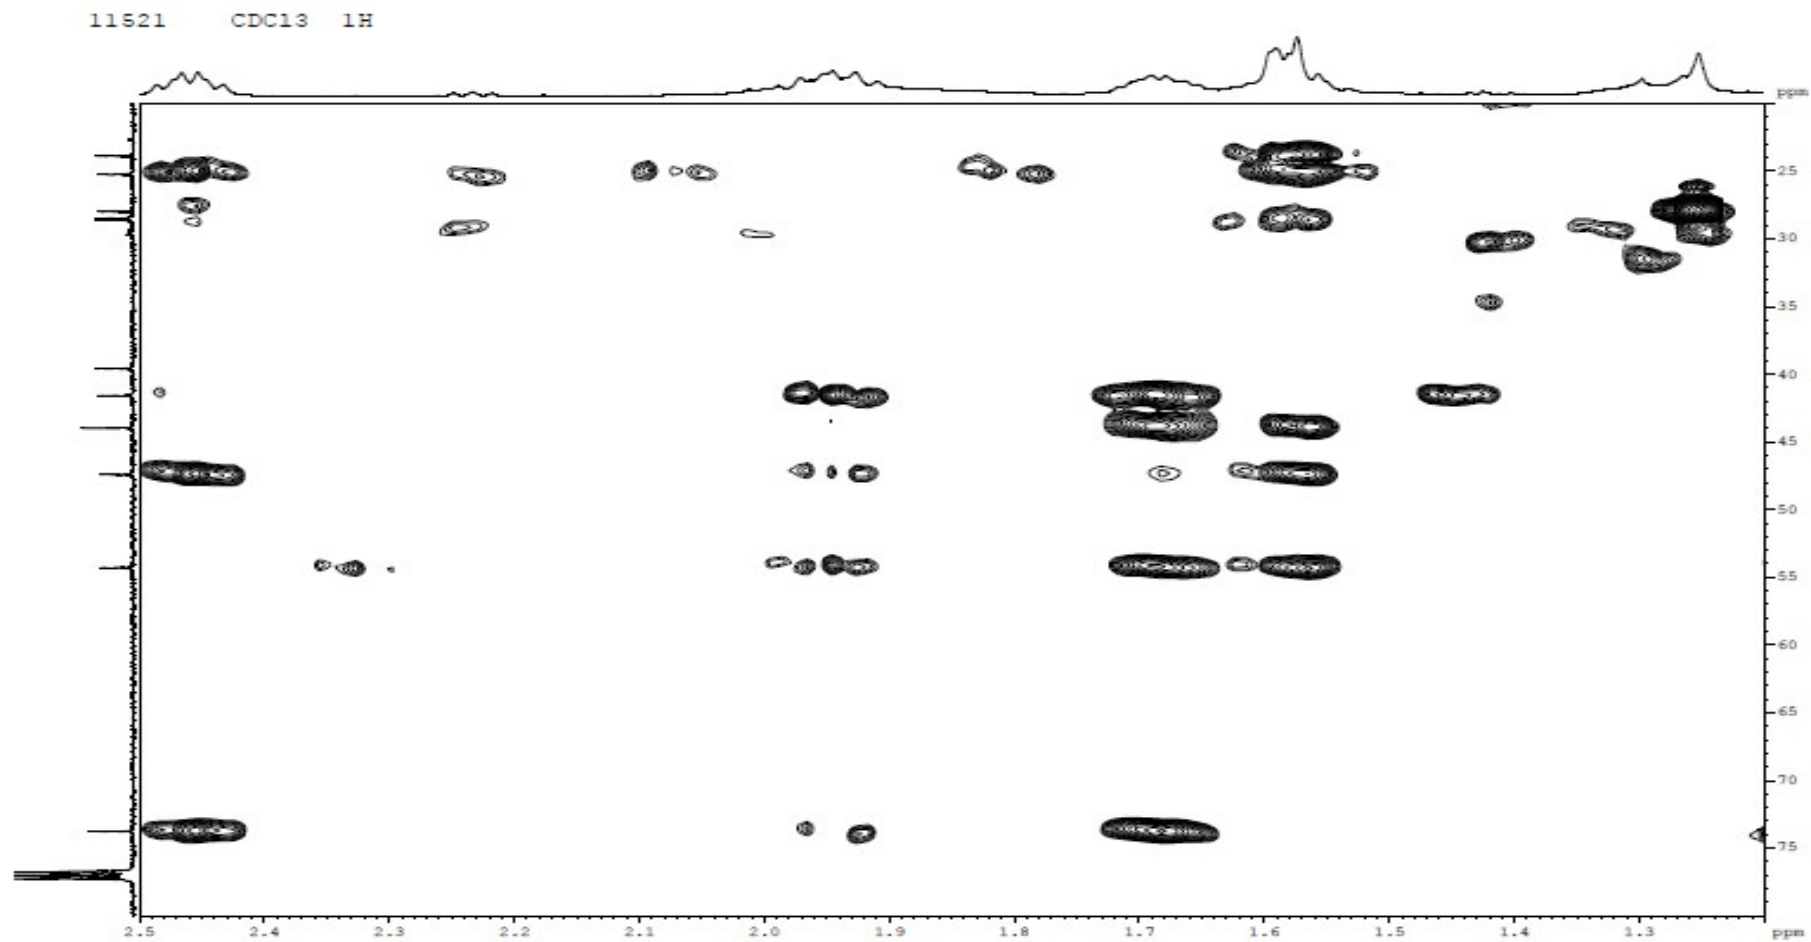

**Figure S10** NOESY NMR spectrum of compound **1** (500 MHz, CDCl<sub>3</sub>)

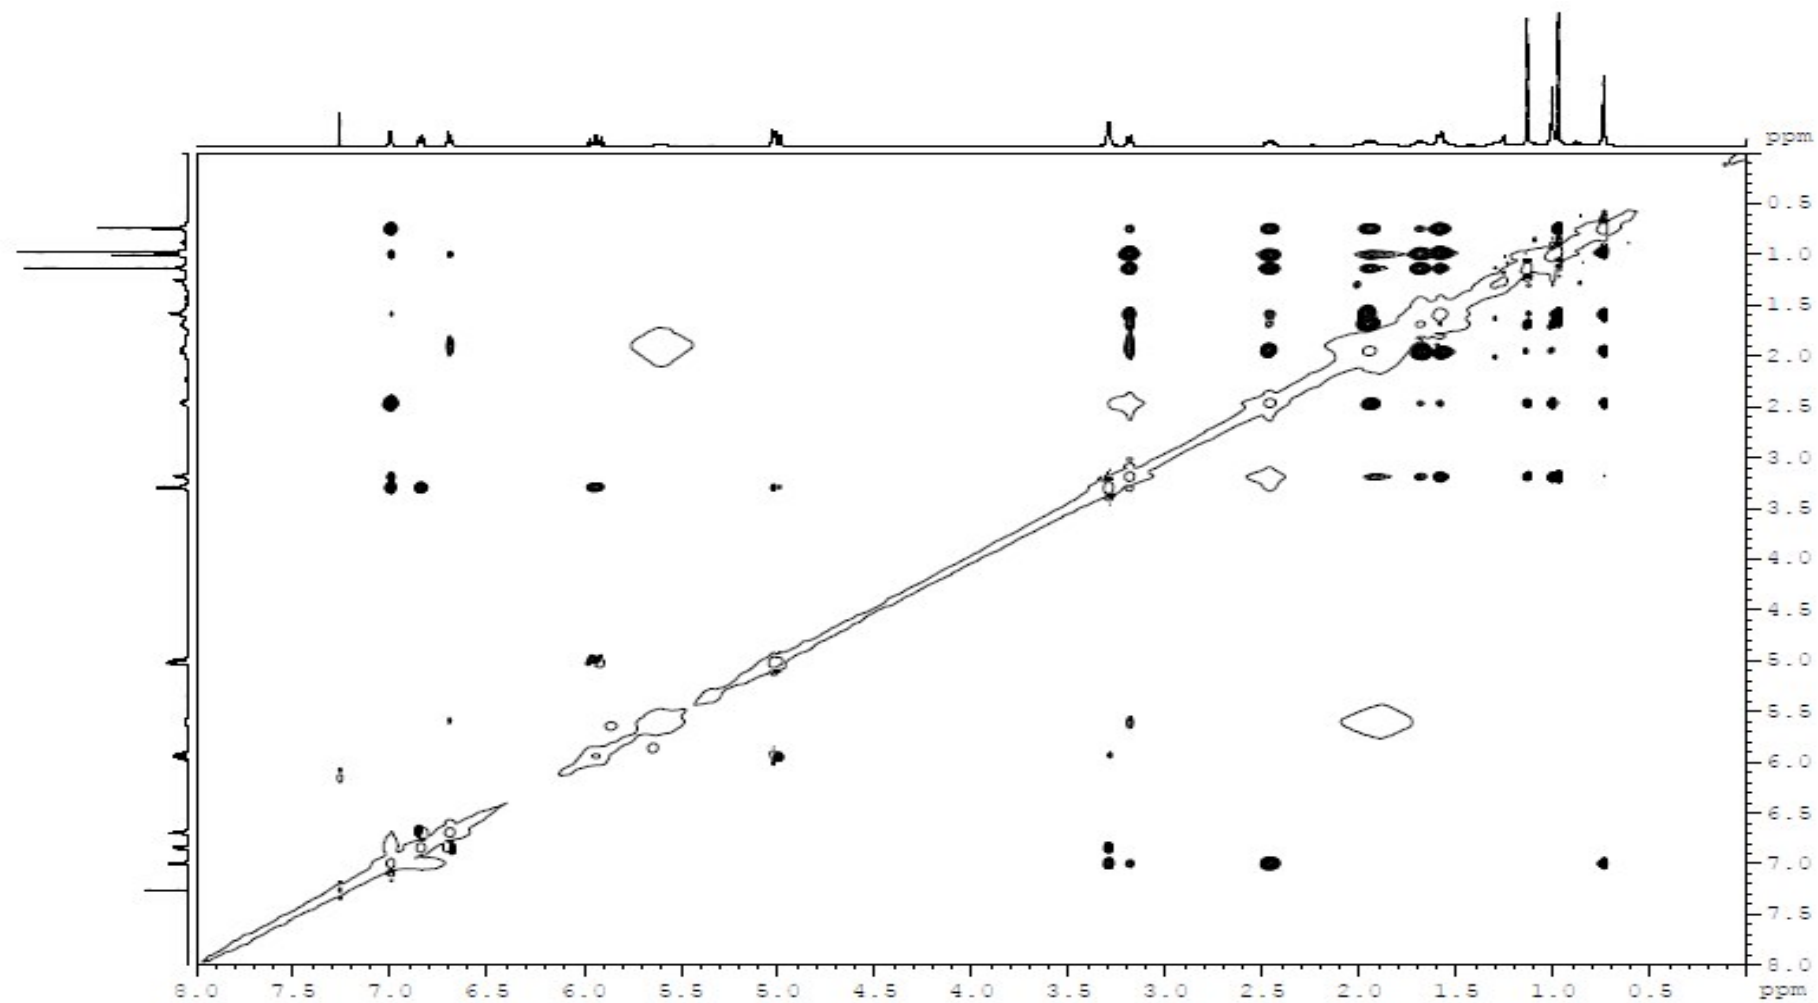

**Figure S11** Expanded NOESY NMR spectrum of compound **1** (500 MHz, CDCl<sub>3</sub>)

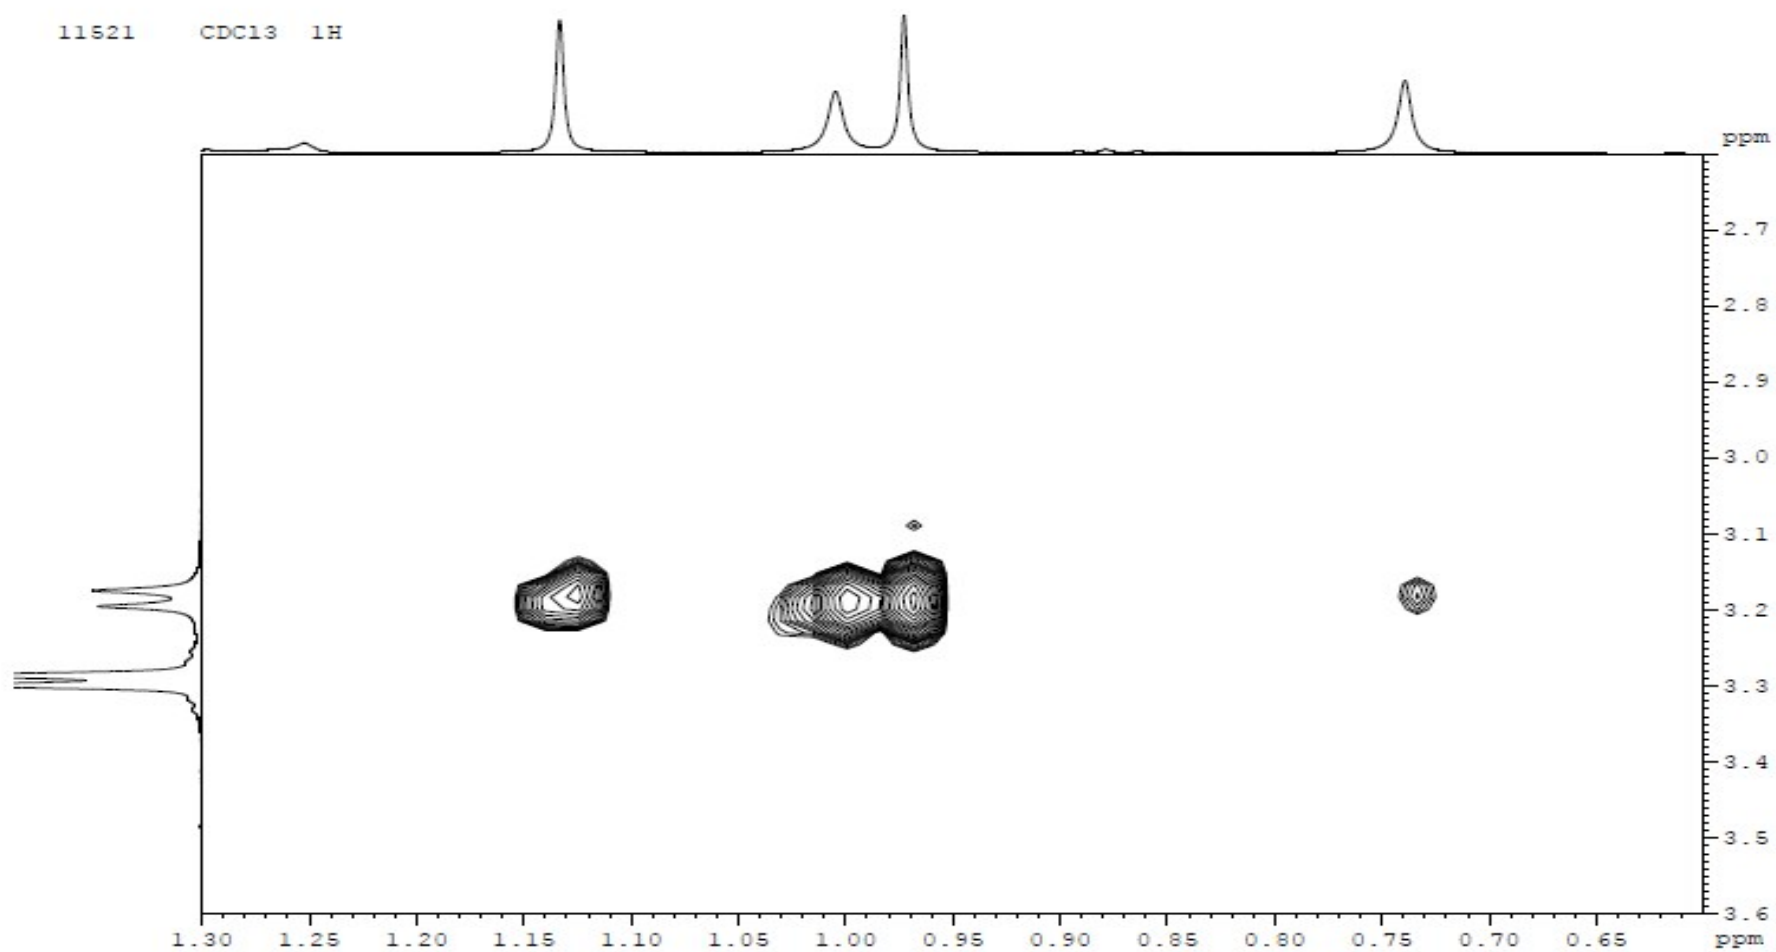

11521

NOESY

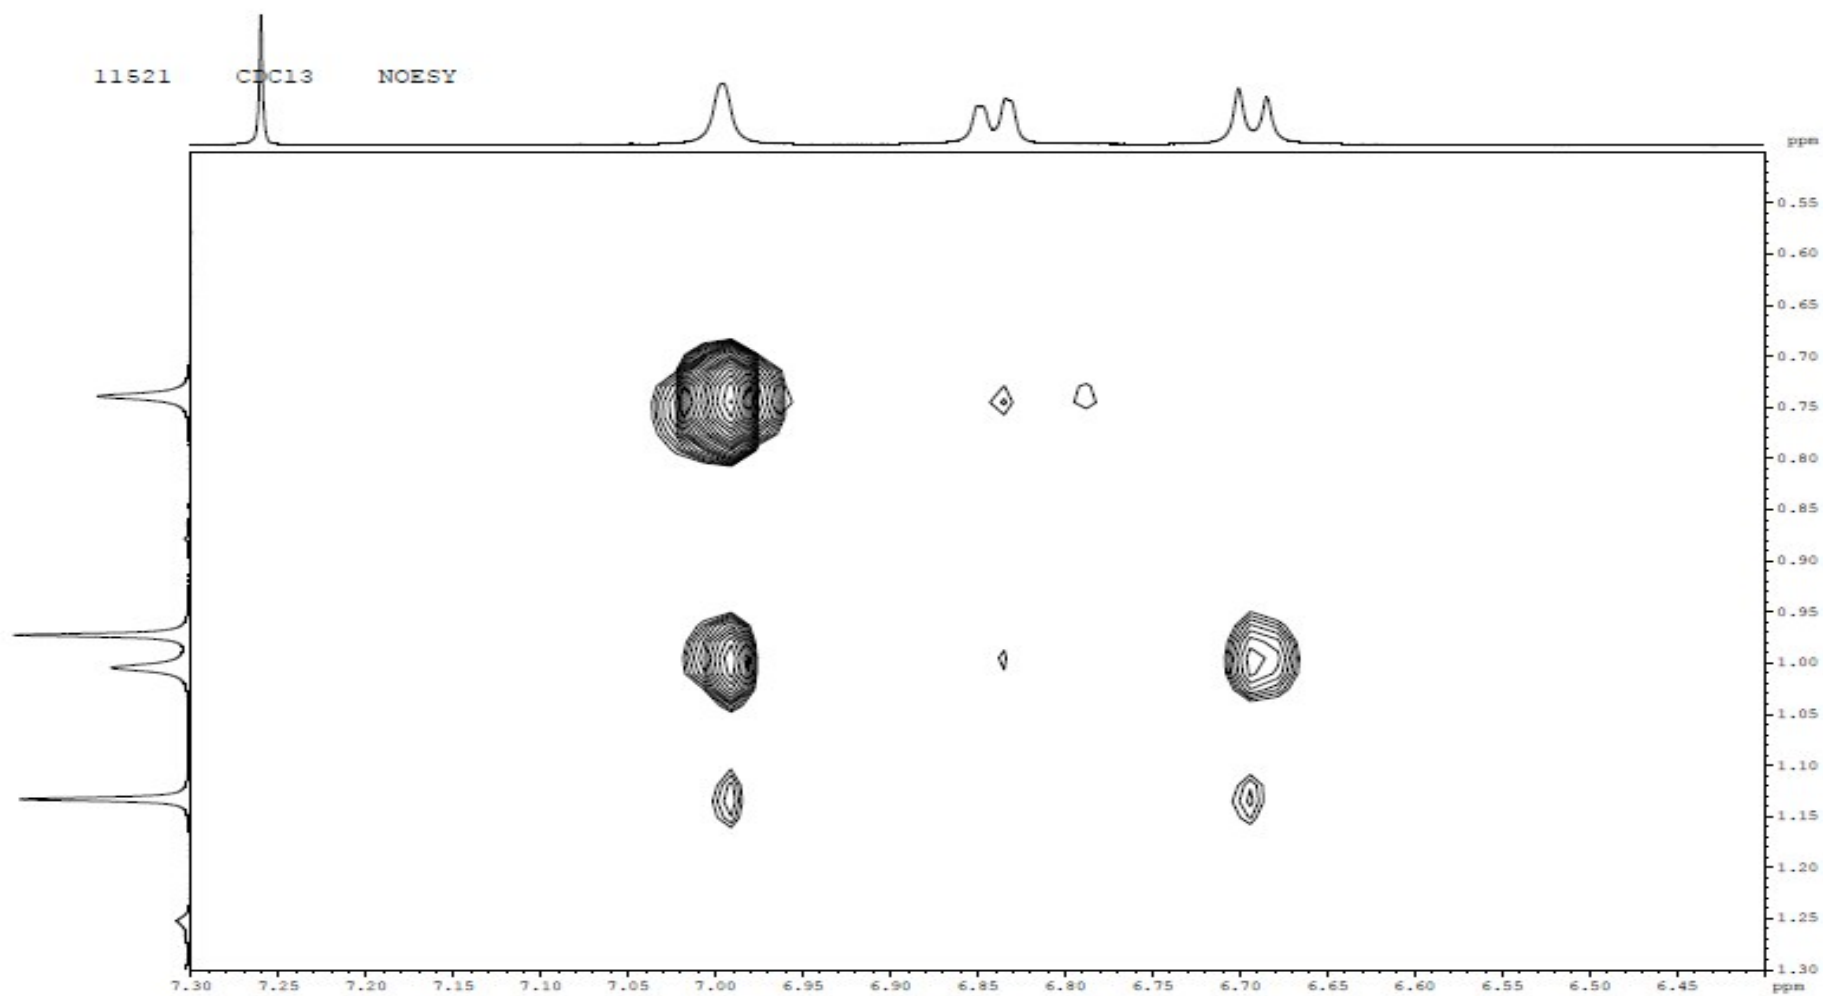

**Figure S13** HREIMS spectrum of compound **2**

|        |                                   |           |               |                     |    |
|--------|-----------------------------------|-----------|---------------|---------------------|----|
| LIST:  | h1610001-c1                       | 05-Jan-16 | Elapse:       | 03:24.9             | 16 |
| Sampl: | IM57                              |           | Start :       | 14:57:15            | 26 |
| Comm:  | Finnigan/MAT95/70eV/R:10000       |           |               |                     |    |
| Mode:  | EI +VE +LMR BSCAN (EXP) UP HR NRM |           | Study :       | S/N: FT200712-01-01 |    |
| Oper:  | SIMM.CAS                          | Client:   | S/N: PT001263 | Inlet :             |    |
| Limit: | 0                                 |           |               |                     |    |
|        | 18%   C21.H100.O2                 |           |               |                     |    |
| Peak:  | 1000.00 mmu                       | R+D:      | -2.0 > 60.0   |                     |    |
| Data:  | CMAS : converted                  |           |               |                     |    |

  

| Mass       | Intensity | AB     | ABR   | Delta | R+D | Composition |
|------------|-----------|--------|-------|-------|-----|-------------|
| 91.05489 * | 99789     | 7.92   | 0.87  | -0.1  | 4.5 | C7.H7       |
| 93.07056 * | 21683     | 1.72   | 0.19  | -0.1  | 3.5 | C7.H9       |
| 105.0352 * | 30663     | 2.43   | 0.27  | -1.2  | 5.5 | C7.H5.O     |
| 107.0086 * | 19378     | 1.54   | 0.17  |       |     |             |
| 107.0448 * | 42779     | 2.49   | 0.39  |       |     |             |
| 113.0606 * | 27295     | 2.17   | 0.24  | -0.3  | 2.5 | C6.H9.O2    |
| 115.0332 * | 68003     | 5.40   | 0.59  |       |     |             |
| 117.0608 * | 32554     | 2.58   | 0.28  |       |     |             |
| 119.0861 * | 26291     | 2.09   | 0.23  | 0.0   | 4.5 | C9.H11      |
| 121.1017 * | 138815    | 10.95  | 1.16  | 0.0   | 3.8 | C9.H12      |
| 122.1082 * | 30072     | 2.39   | 0.26  | 1.4   | 3.0 | C9.H14      |
| 127.0545 * | 24164     | 1.92   | 0.21  | 0.3   | 7.5 | C10.H7      |
| 128.0630 * | 58431     | 4.64   | 0.51  | -0.4  | 7.0 | C10.H8      |
| 129.0705 * | 43484     | 3.45   | 0.38  | -0.1  | 6.5 | C10.H9      |
| 131.0496 * | 60121     | 5.41   | 0.59  | 0.0   | 6.5 | C9.H7.O     |
| 141.0702 * | 31786     | 2.52   | 0.28  | 0.2   | 7.5 | C11.H9      |
| 144.0583 * | 32554     | 2.58   | 0.28  | -0.8  | 7.0 | C10.H8.O    |
| 145.0656 * | 66821     | 5.31   | 0.58  | -0.3  | 6.5 | C10.H9.O    |
| 147.0808 * | 329144    | 26.13  | 2.87  | 0.2   | 5.5 | C10.H11.O   |
| 148.0845 * | 31963     | 2.54   | 0.28  |       |     |             |
| 153.0712 * | 19674     | 1.56   | 0.17  | -0.7  | 8.5 | C12.H9      |
| 157.0693 * | 25523     | 2.03   | 0.22  | 0.1   | 7.5 | C11.H9.O    |
| 158.0725 * | 23100     | 1.83   | 0.20  | 0.6   | 7.0 | C11.H10.O   |
| 159.0454 * | 27354     | 2.17   | 0.24  | -0.8  | 7.5 | C10.H7.O2   |
| 159.0812 * | 44606     | 3.54   | 0.39  | -0.4  | 6.5 | C11.H11.O   |
| 165.0713 * | 27886     | 2.21   | 0.24  | -0.9  | 9.5 | C13.H9      |
| 169.0651 * | 52641     | 4.18   | 0.46  | 0.2   | 8.5 | C12.H9.O    |
| 171.0819 * | 1259505   | 100.00 | 10.97 | -0.9  | 7.5 | C12.H11.O   |
| 172.0853 * | 154912    | 12.30  | 1.35  |       |     |             |
| 173.0941 * | 23041     | 1.83   | 0.20  | 2.6   | 6.5 | C12.H13.O   |
| 183.0801 * | 56304     | 4.47   | 0.49  | 0.9   | 8.5 | C13.H11.O   |
| 184.0872 * | 148708    | 11.81  | 1.29  | 1.6   | 8.0 | C13.H12.O   |
| 185.0958 * | 229650    | 18.23  | 2.00  | 0.8   | 7.5 | C13.H13.O   |
| 186.1009 * | 34326     | 2.73   | 0.30  |       |     |             |
| 187.1116 * | 40411     | 3.21   | 0.35  | 0.7   | 6.5 | C13.H15.O   |
| 197.0945 * | 41475     | 3.29   | 0.36  | 2.1   | 8.5 | C14.H13.O   |
| 199.1107 * | 29068     | 2.31   | 0.25  | 1.6   | 7.5 | C14.H15.O   |
| 201.1276 * | 36512     | 2.90   | 0.32  | 0.3   | 6.5 | C14.H17.O   |
| 211.1108 * | 23573     | 1.87   | 0.21  | 1.5   | 8.5 | C15.H15.O   |
| 212.1189 * | 27709     | 2.20   | 0.24  | 1.2   | 8.0 | C15.H16.O   |
| 213.1272 * | 48919     | 3.88   | 0.43  | 0.8   | 7.5 | C15.H17.O   |
| 229.1271 * | 750043    | 59.55  | 6.53  | 0.8   | 8.5 | C16.H17.O   |
| 226.1311 * | 125548    | 9.97   | 1.09  |       |     |             |
| 227.1065 * | 47460     | 1.78   | 0.41  | 0.7   | 8.5 | C15.H15.O2  |
| 227.1415 * | 69184     | 5.49   | 0.60  | 2.0   | 7.5 | C16.H19.O   |
| 228.1509 * | 208381    | 16.54  | 1.81  | 0.5   | 7.0 | C16.H20.O   |
| 229.1546 * | 29659     | 2.35   | 0.26  |       |     |             |
| 243.1380 * | 132225    | 10.50  | 1.15  | 0.5   | 7.5 | C16.H19.O2  |
| 244.1420 * | 20202     | 1.60   | 0.18  |       |     |             |
| 253.1596 * | 93172     | 7.40   | 0.81  | -0.4  | 8.5 | C18.H21.O   |
| 268.1836 * | 67353     | 5.35   | 0.59  | -0.9  | 8.0 | C19.H24.O   |
| 286.1931 * | 141678    | 11.25  | 1.23  | 0.2   | 7.0 | C19.H26.O2  |
| 287.1954 * | 22096     | 1.75   | 0.19  |       |     |             |



**Figure S14** CD spectrum of compound 2

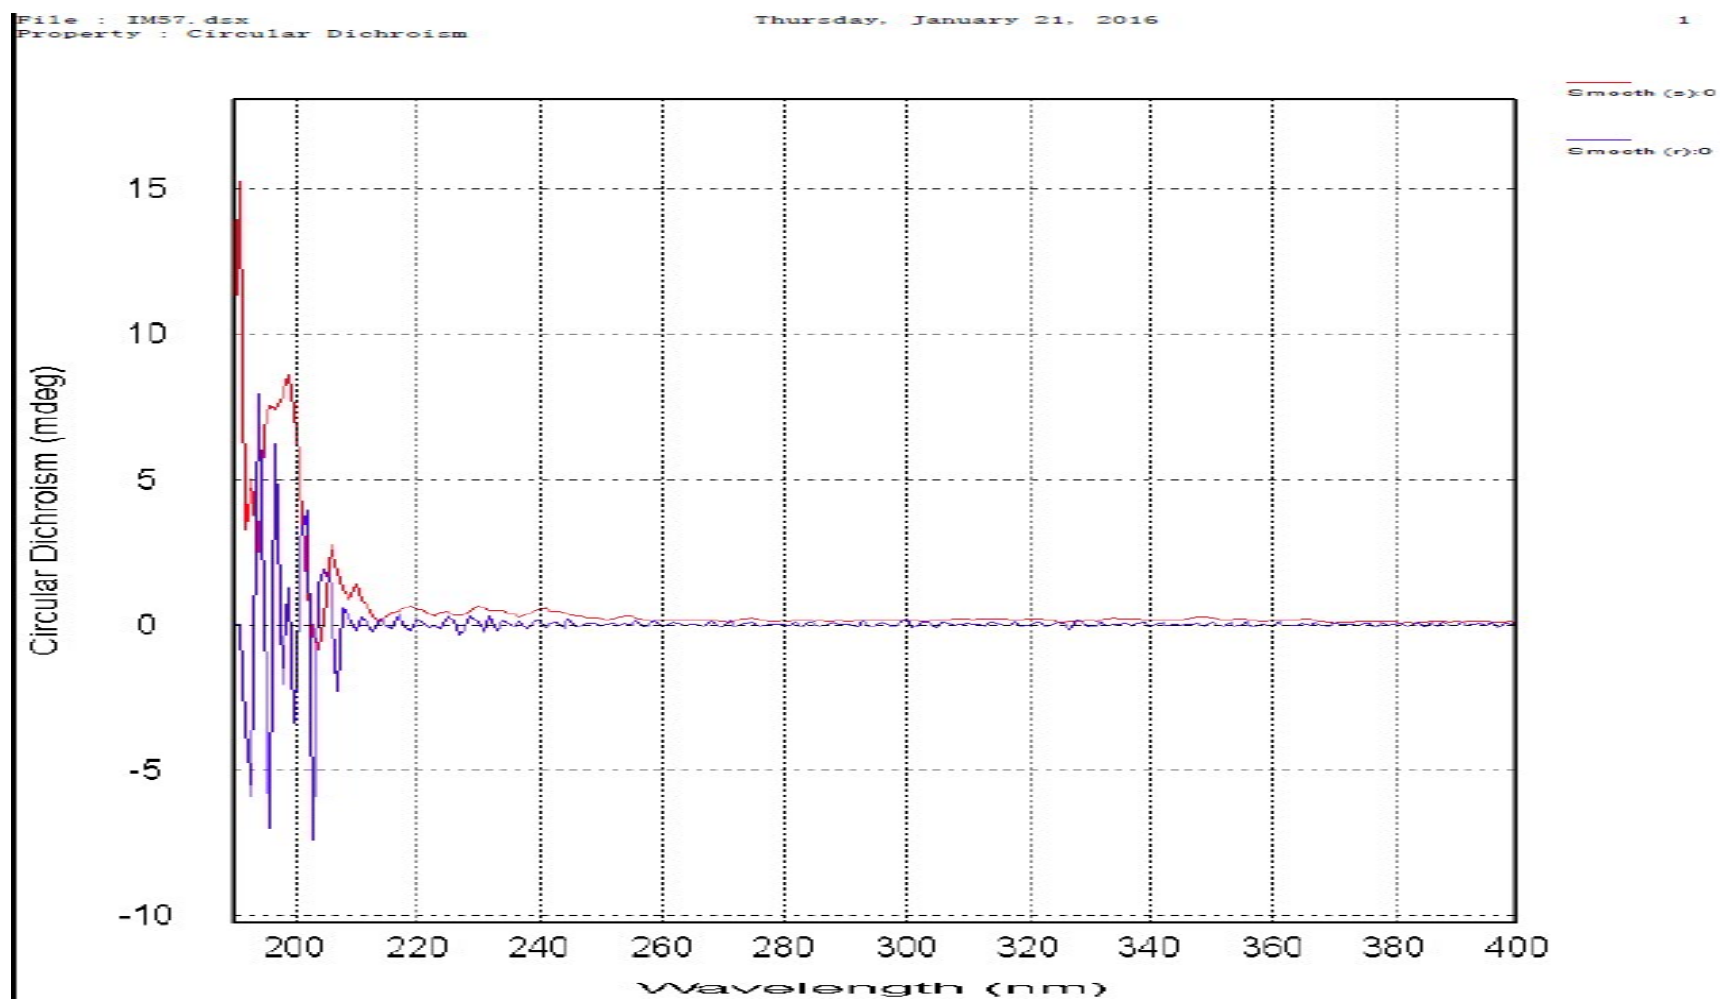

HL-IM-57 HNMR

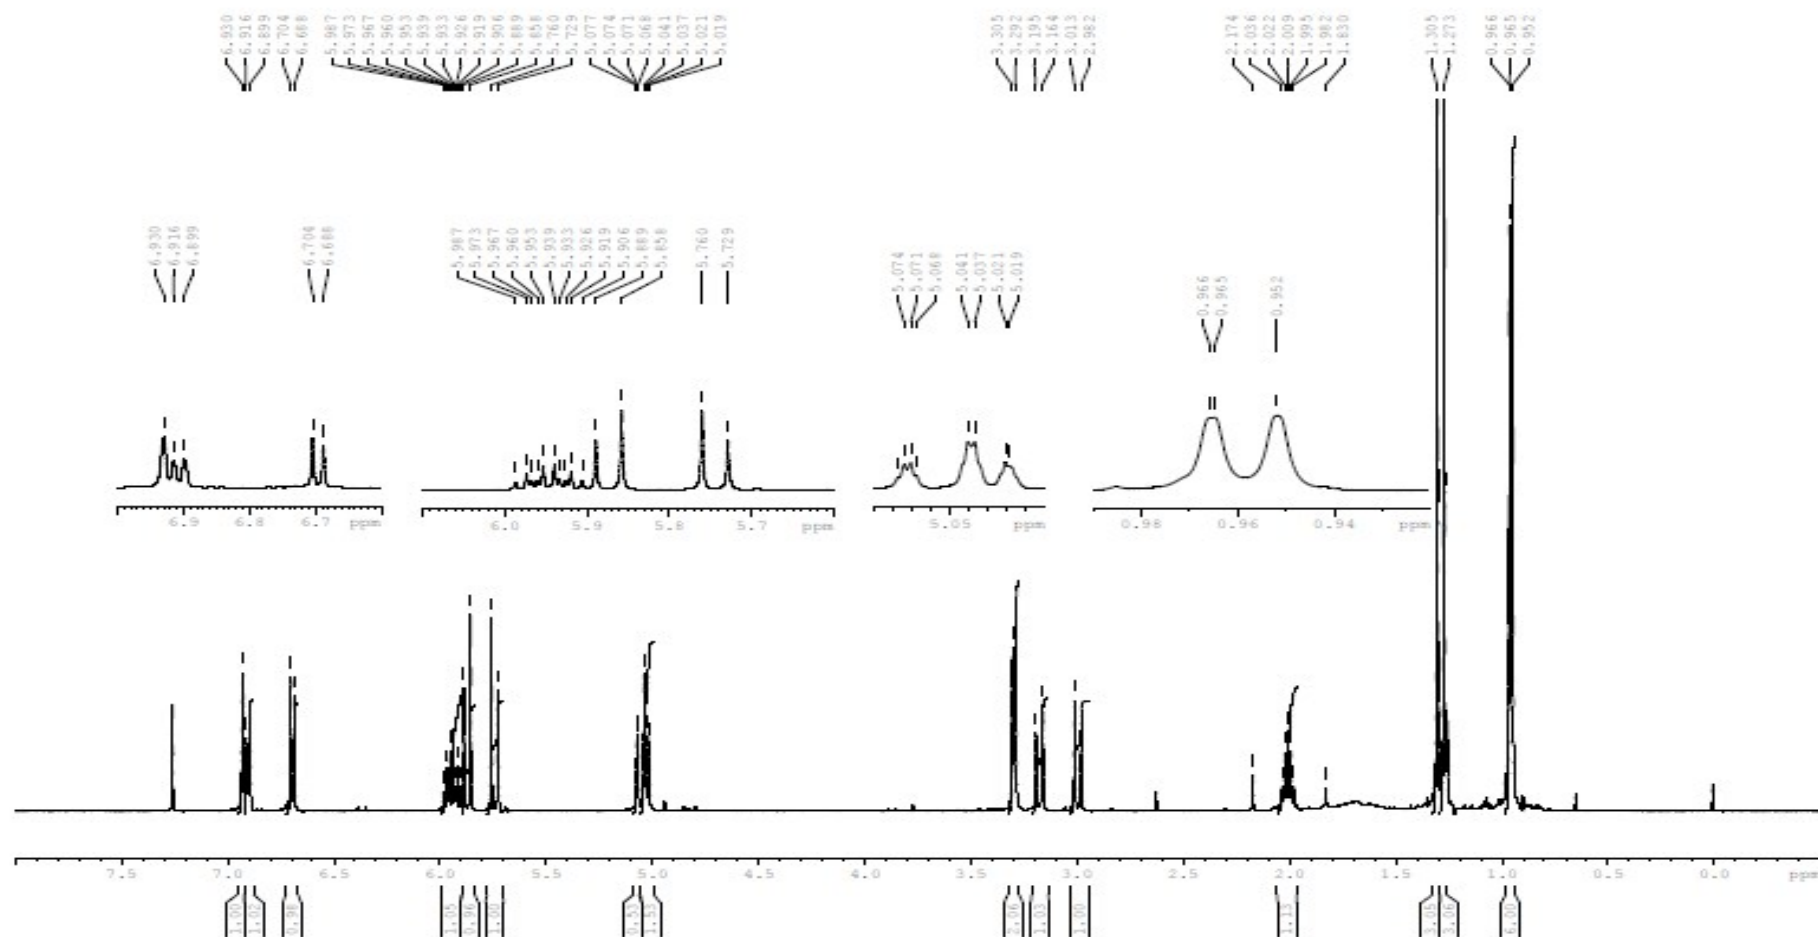

**Figure S16**  $^{13}\text{C}$  NMR spectrum of compound **2** (125 MHz,  $\text{CDCl}_3$ )

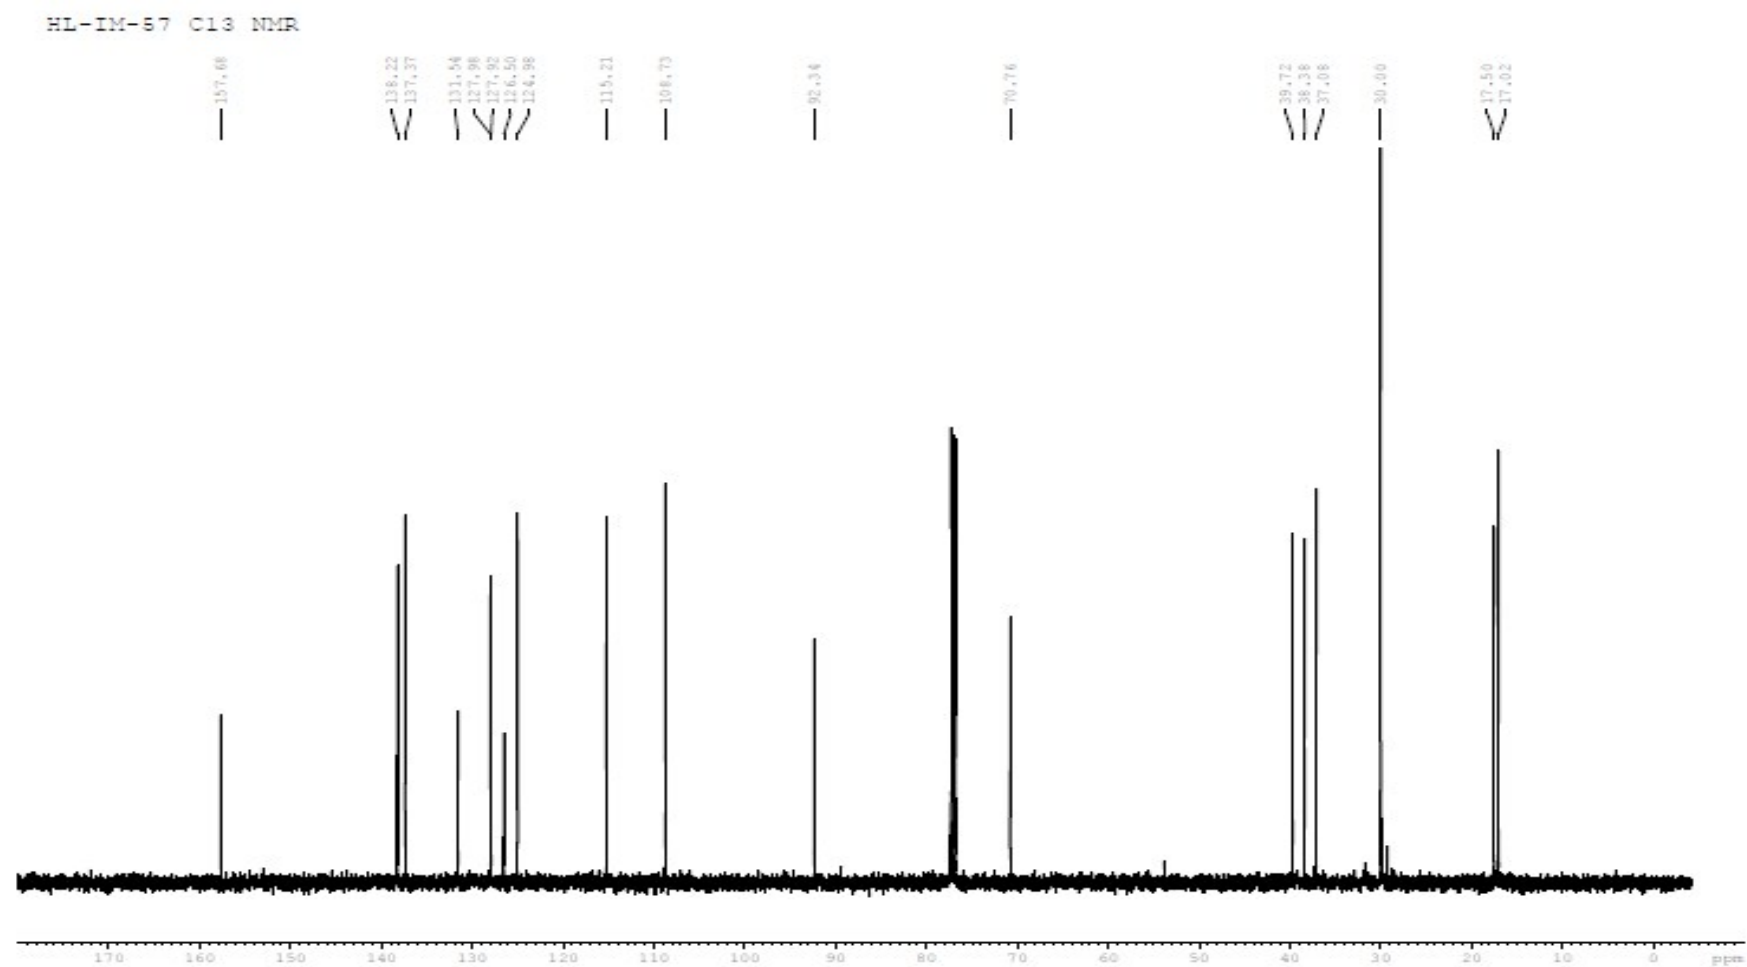

**Figure S17** DEPT NMR spectrum of compound **2** (125 MHz, CDCl<sub>3</sub>)

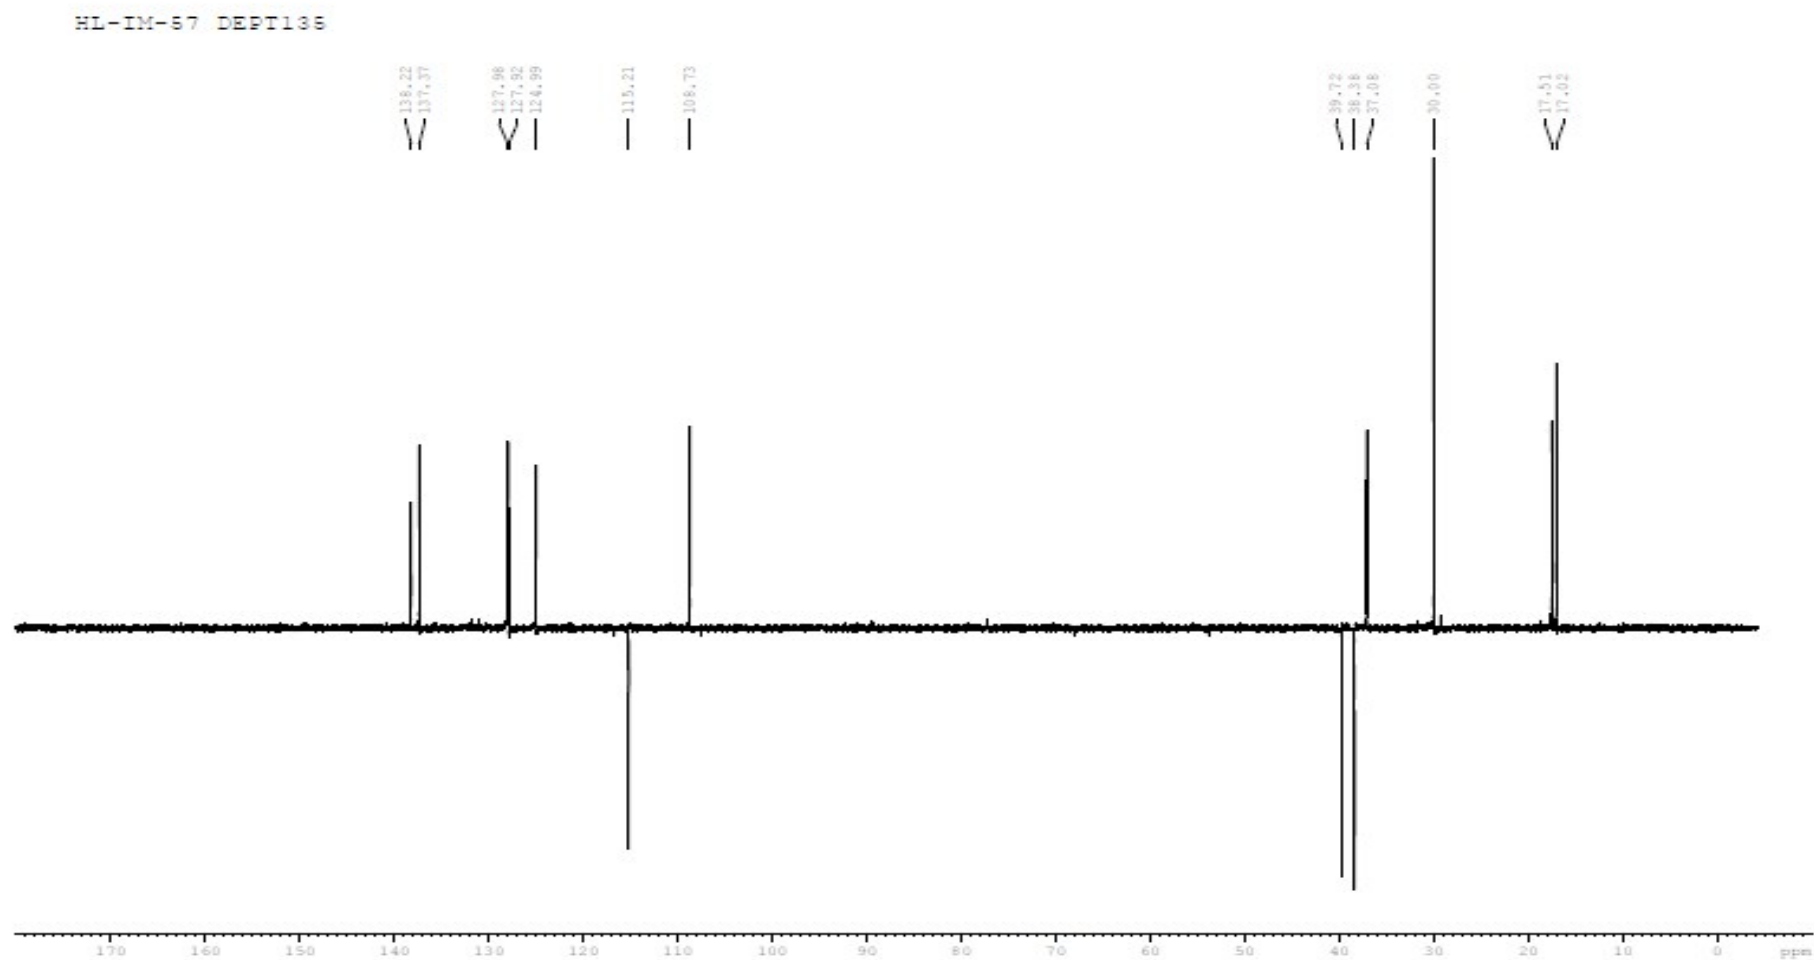

**Figure S18**  $^1\text{H}$ - $^1\text{H}$  COSY NMR spectrum of compound **2** (500 MHz,  $\text{CDCl}_3$ )

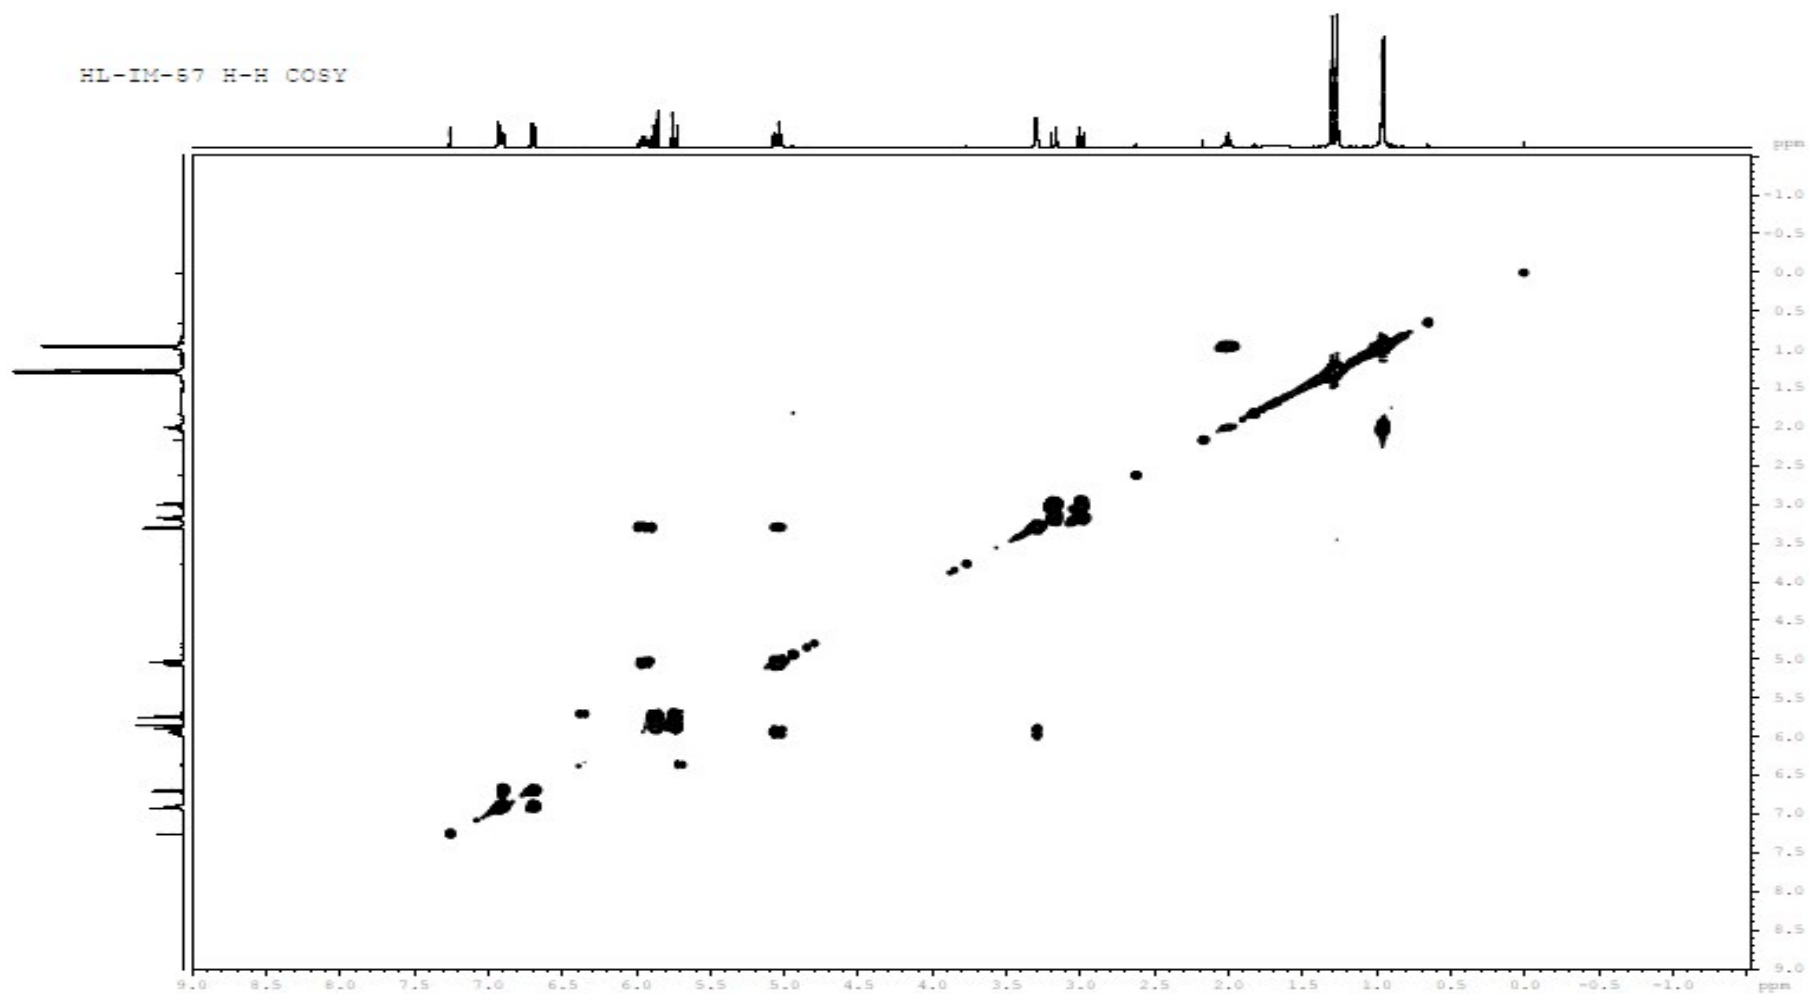

**Figure S19** HSQC NMR spectrum of compound **2** (500 MHz, CDCl<sub>3</sub>)

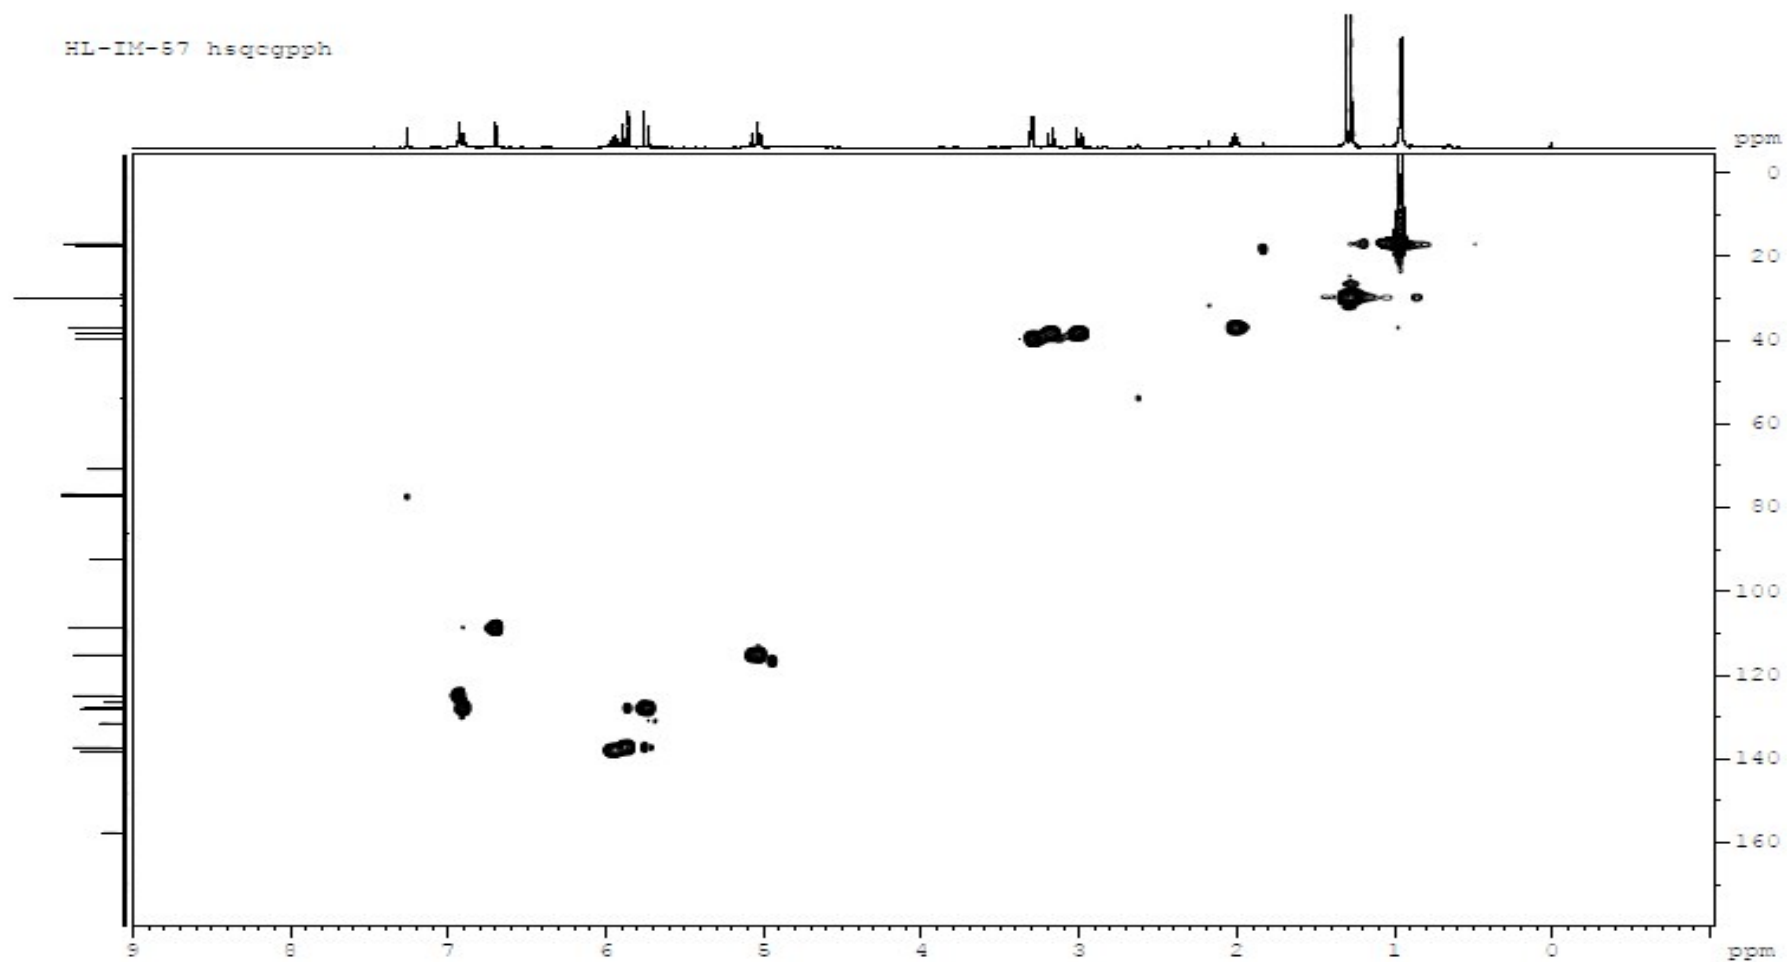

**Figure S20** HMBC NMR spectrum of compound **2** (500 MHz, CDCl<sub>3</sub>)

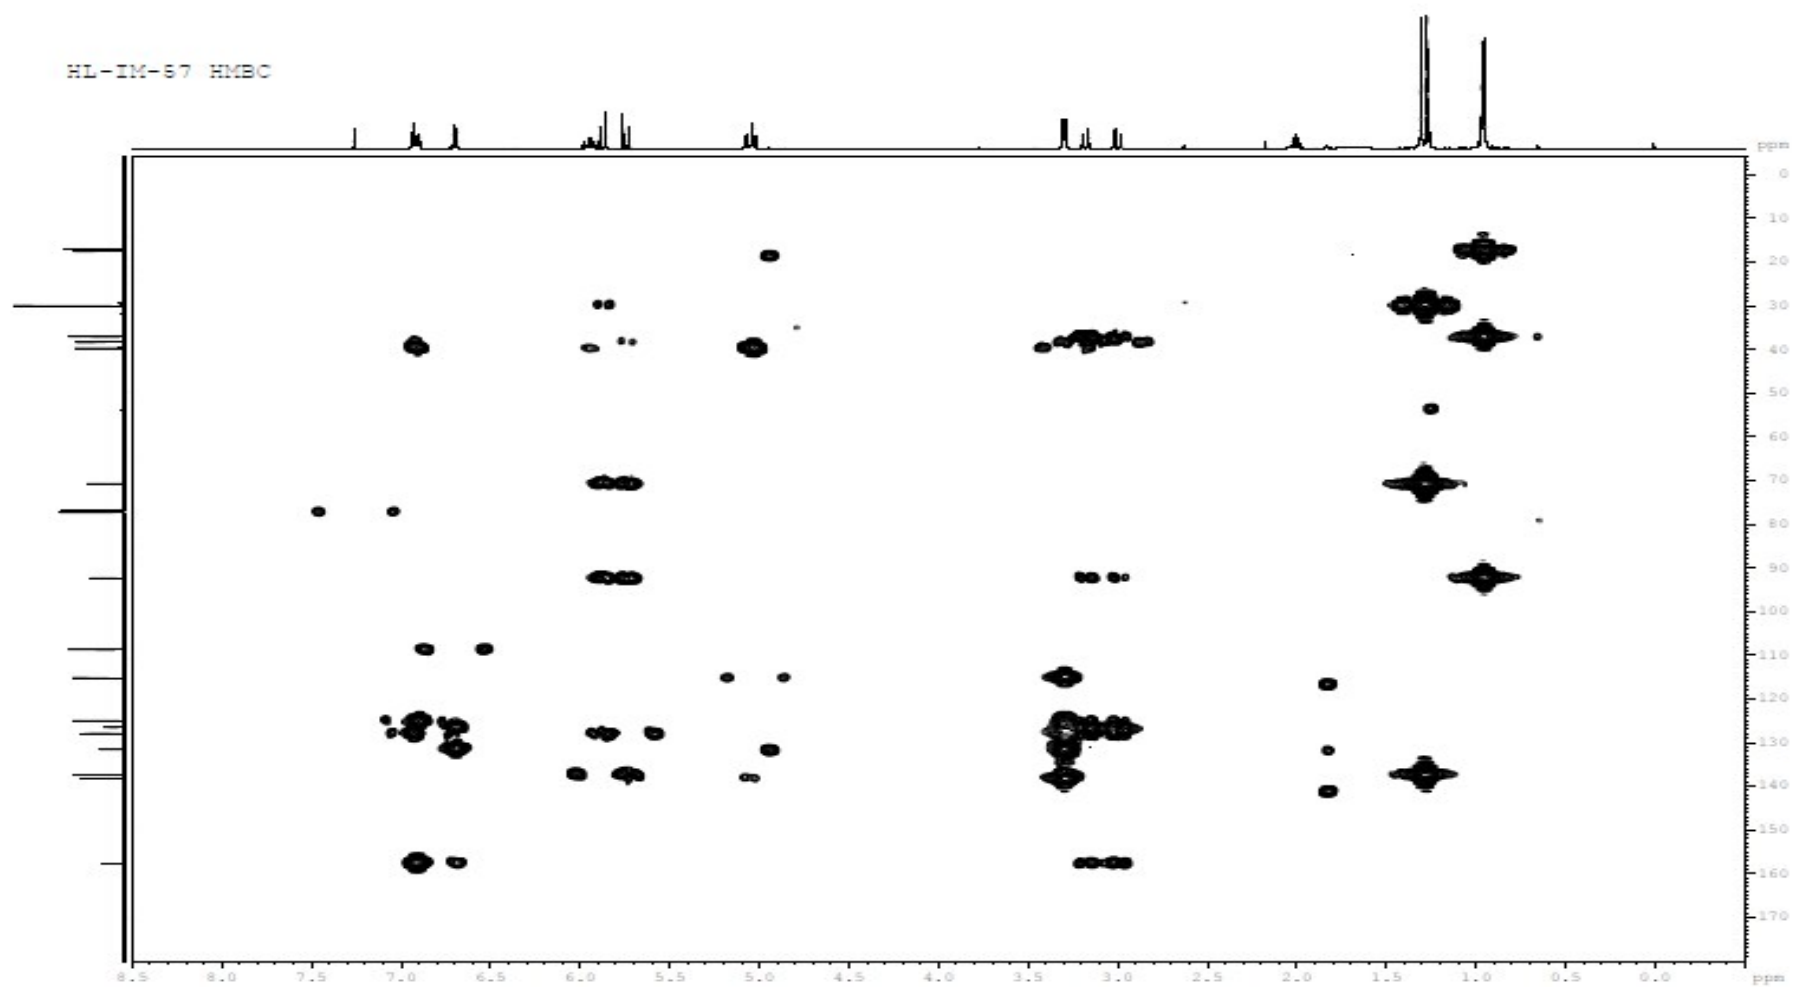

**Figure S21** NOESY NMR spectrum of compound **2** (500 MHz, CDCl<sub>3</sub>)

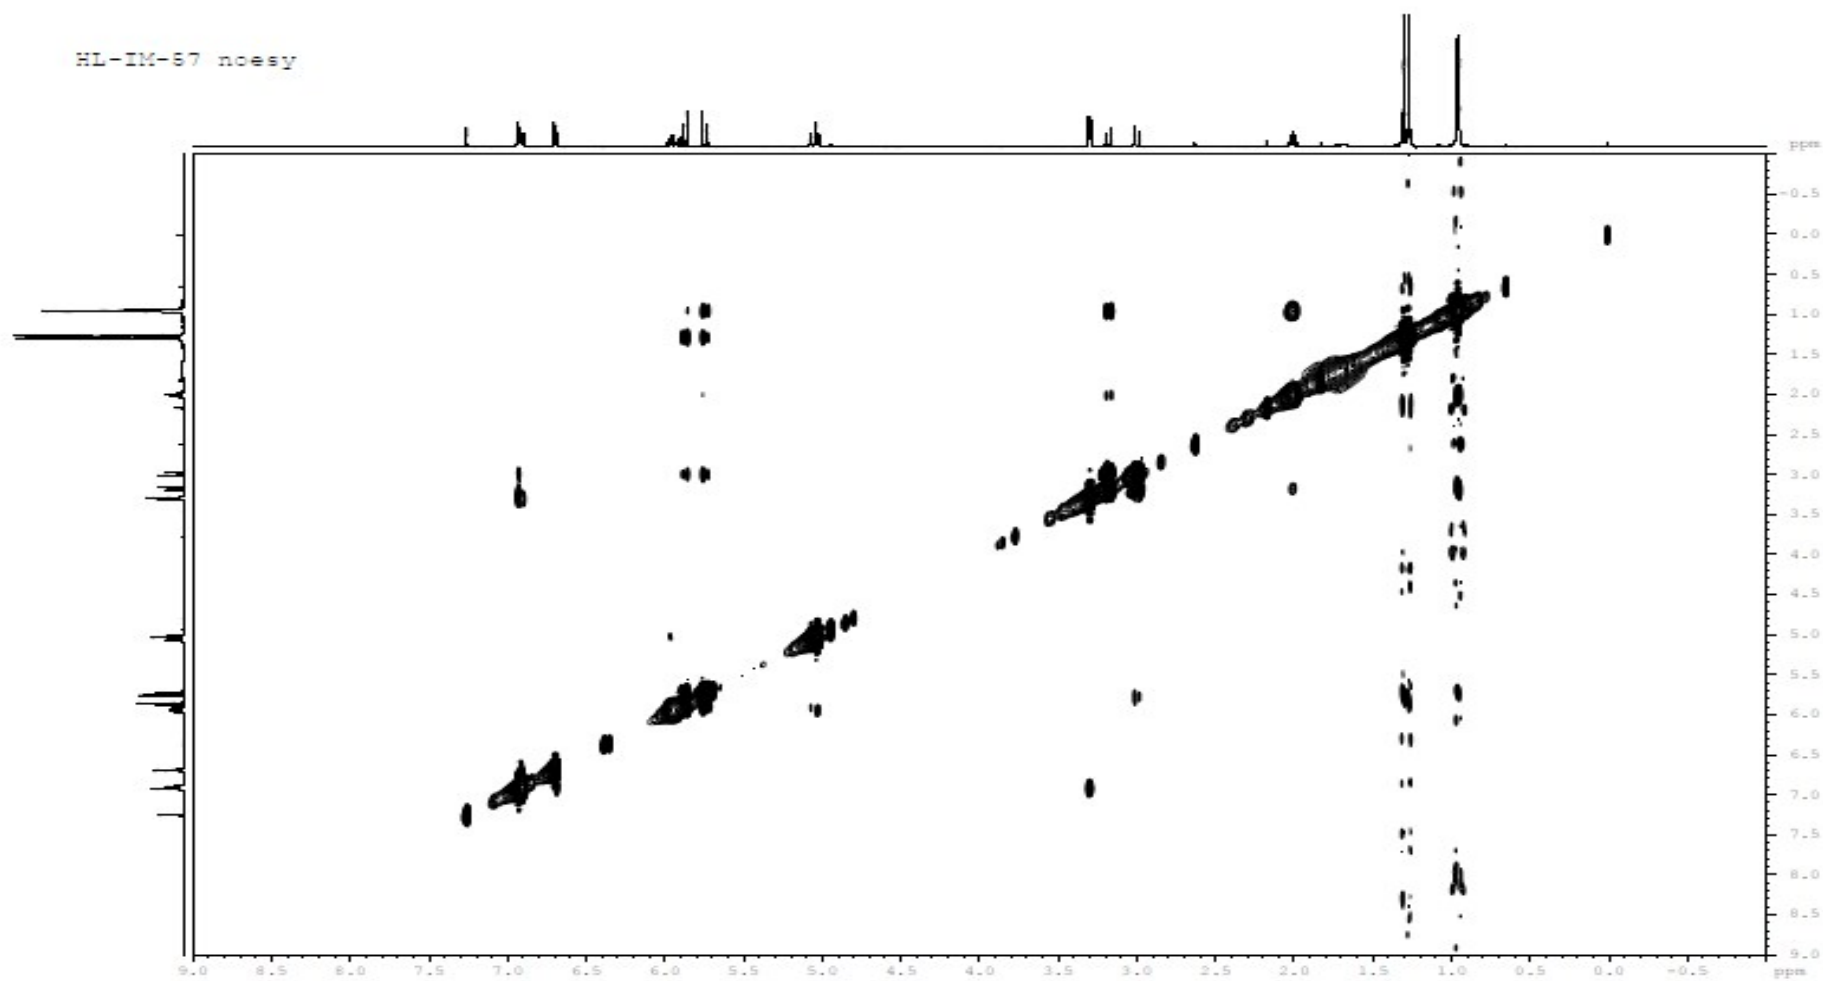



**Figure S22** HRESIMS spectrum of compound **3**

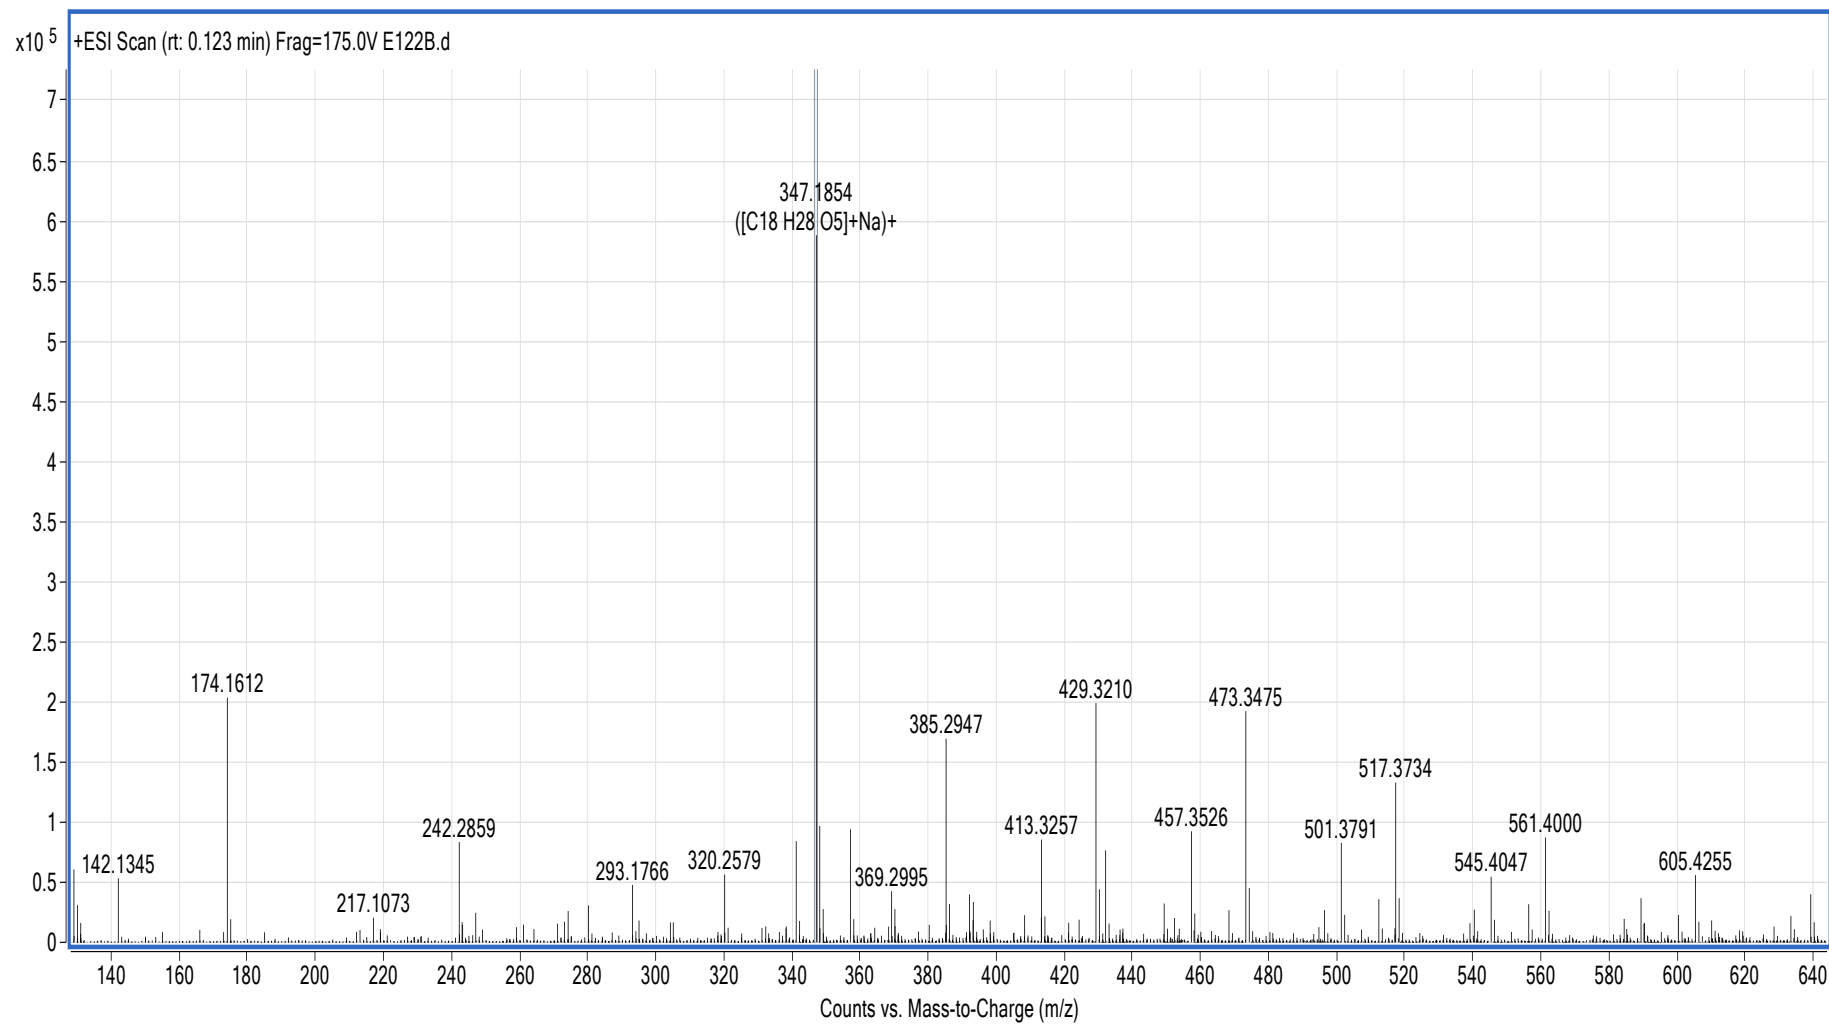

**Figure S23** CD spectrum of compound **3** (500 MHz, CDCl<sub>3</sub>)

File : E12200186.dsx  
Property : Circular Dichroism

Thursday, January 21, 2016

1

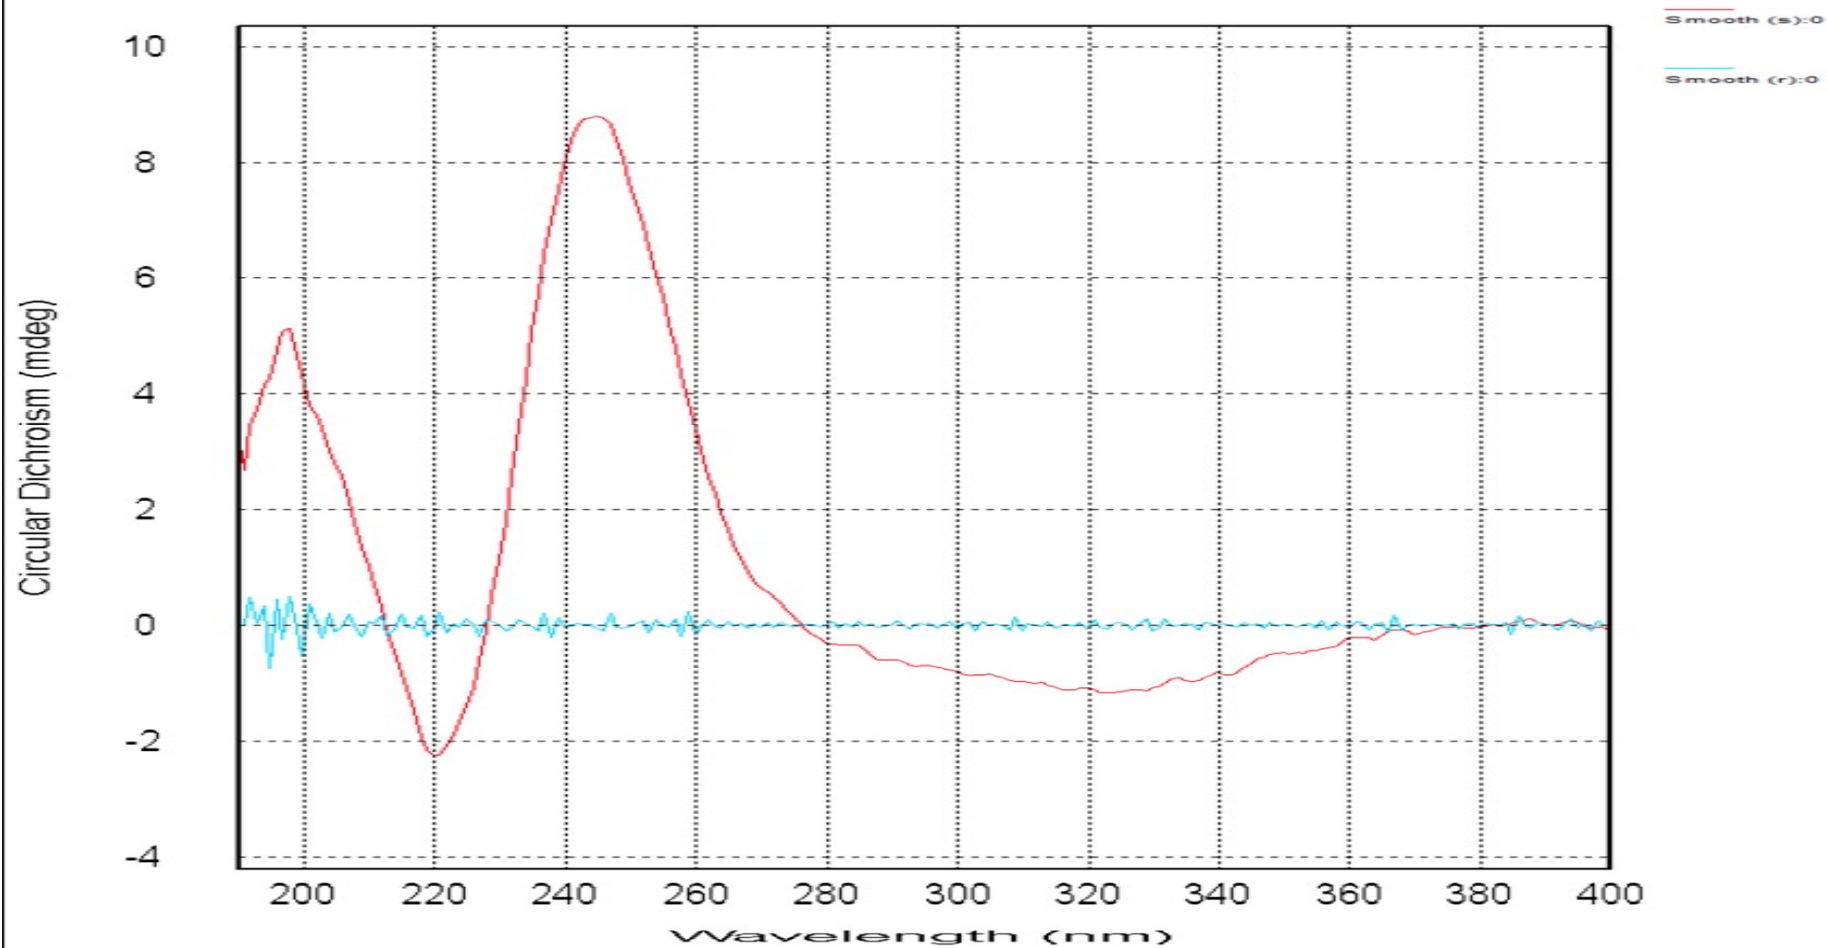

**Figure S24**  $^1\text{H}$  NMR spectrum of compound **3** (500 MHz,  $\text{CDCl}_3$ )

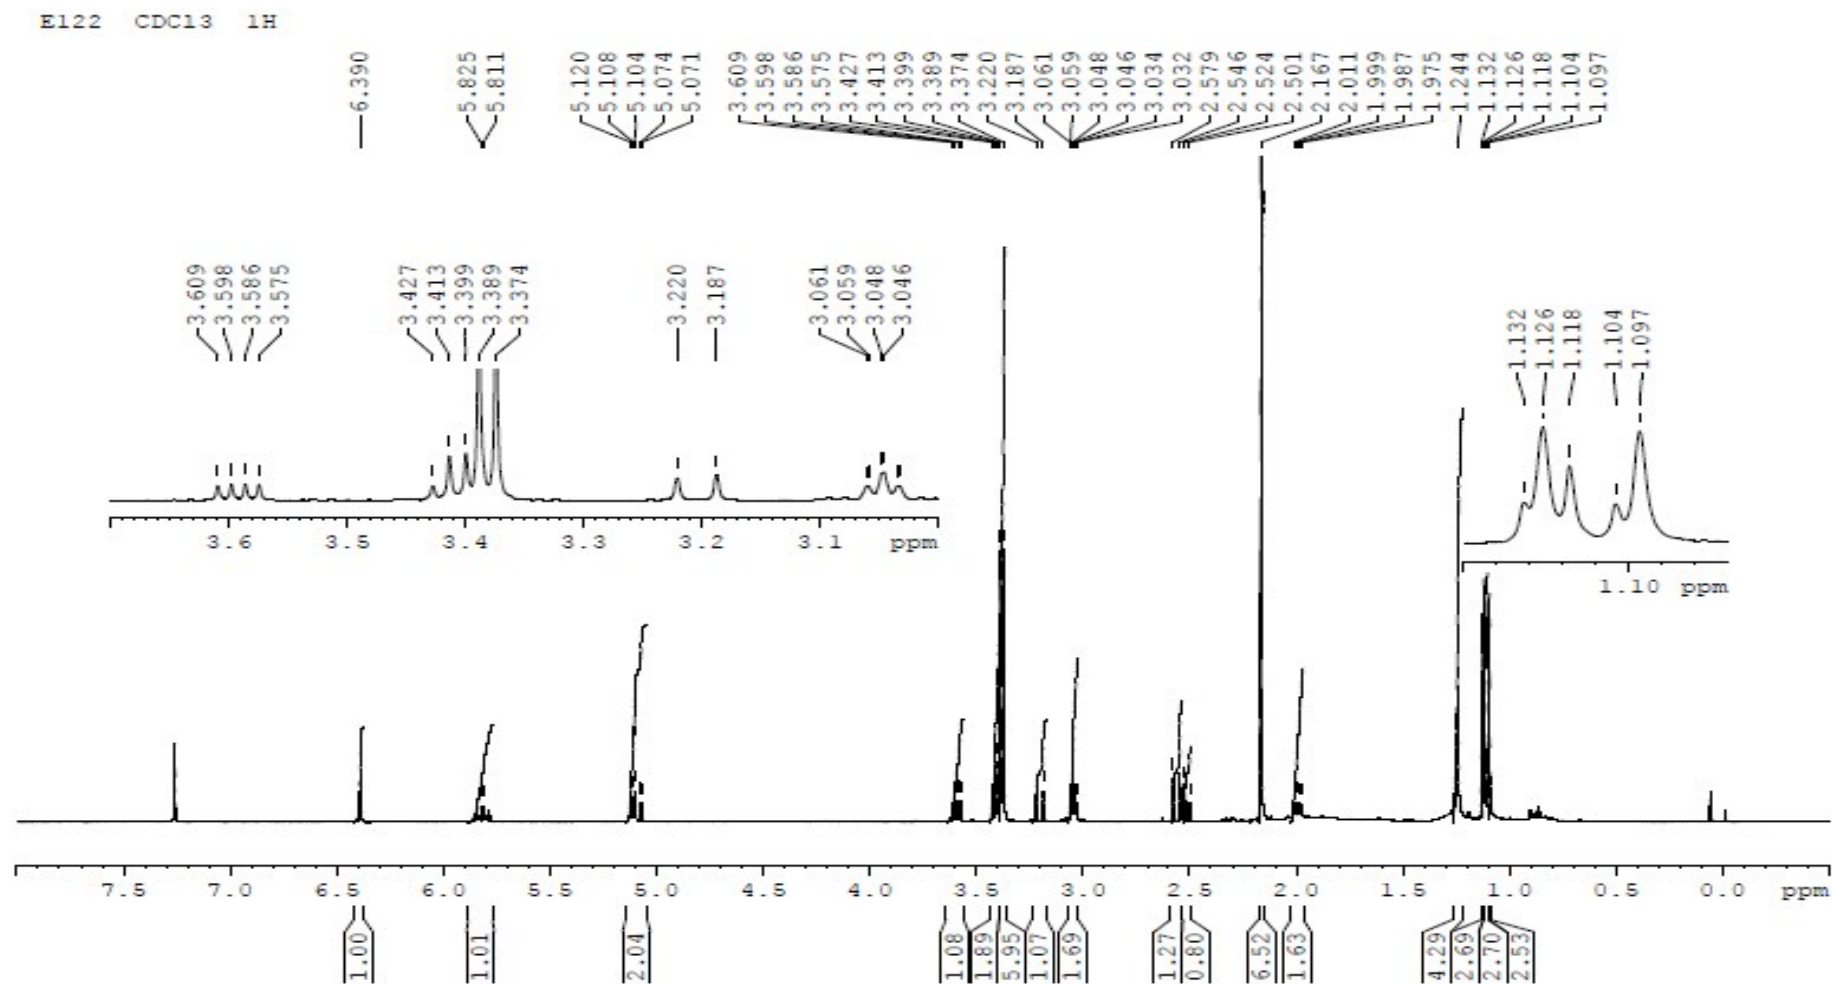

**Figure S25**  $^{13}\text{C}$  NMR spectrum of compound **3** (125 MHz,  $\text{CDCl}_3$ )

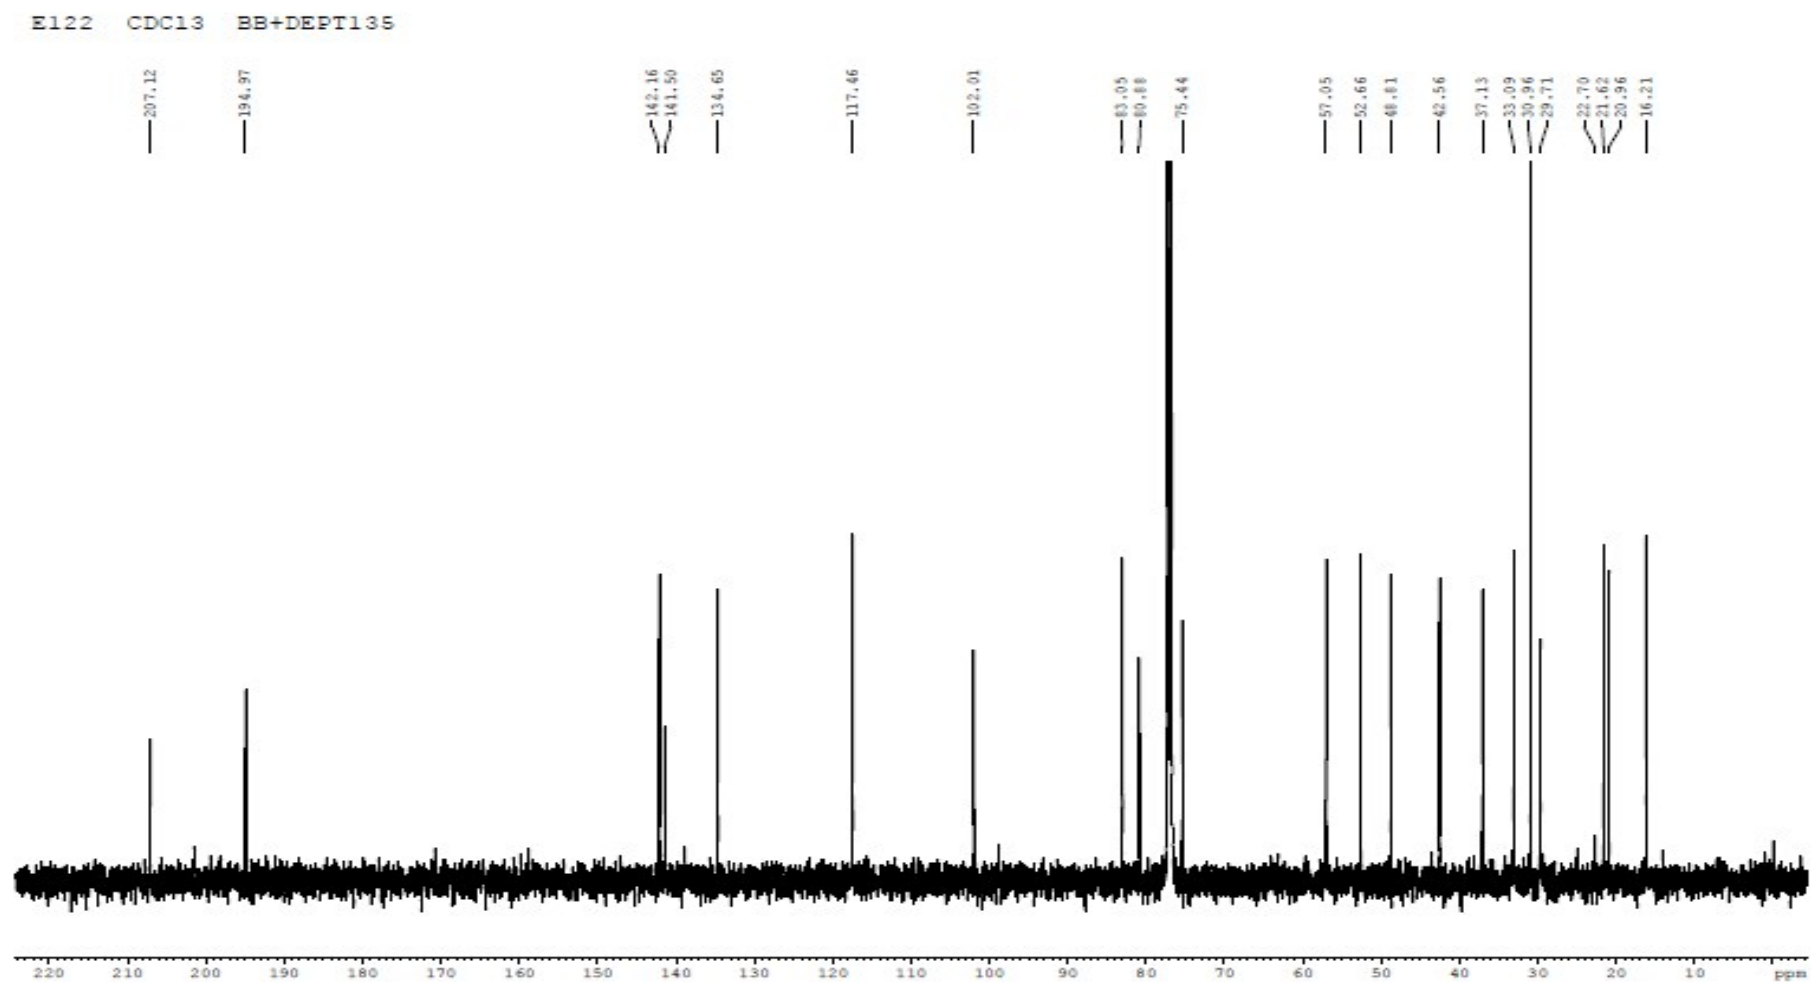

**Figure S26** DEPT NMR spectrum of compound **3** (125 MHz, CDCl<sub>3</sub>)

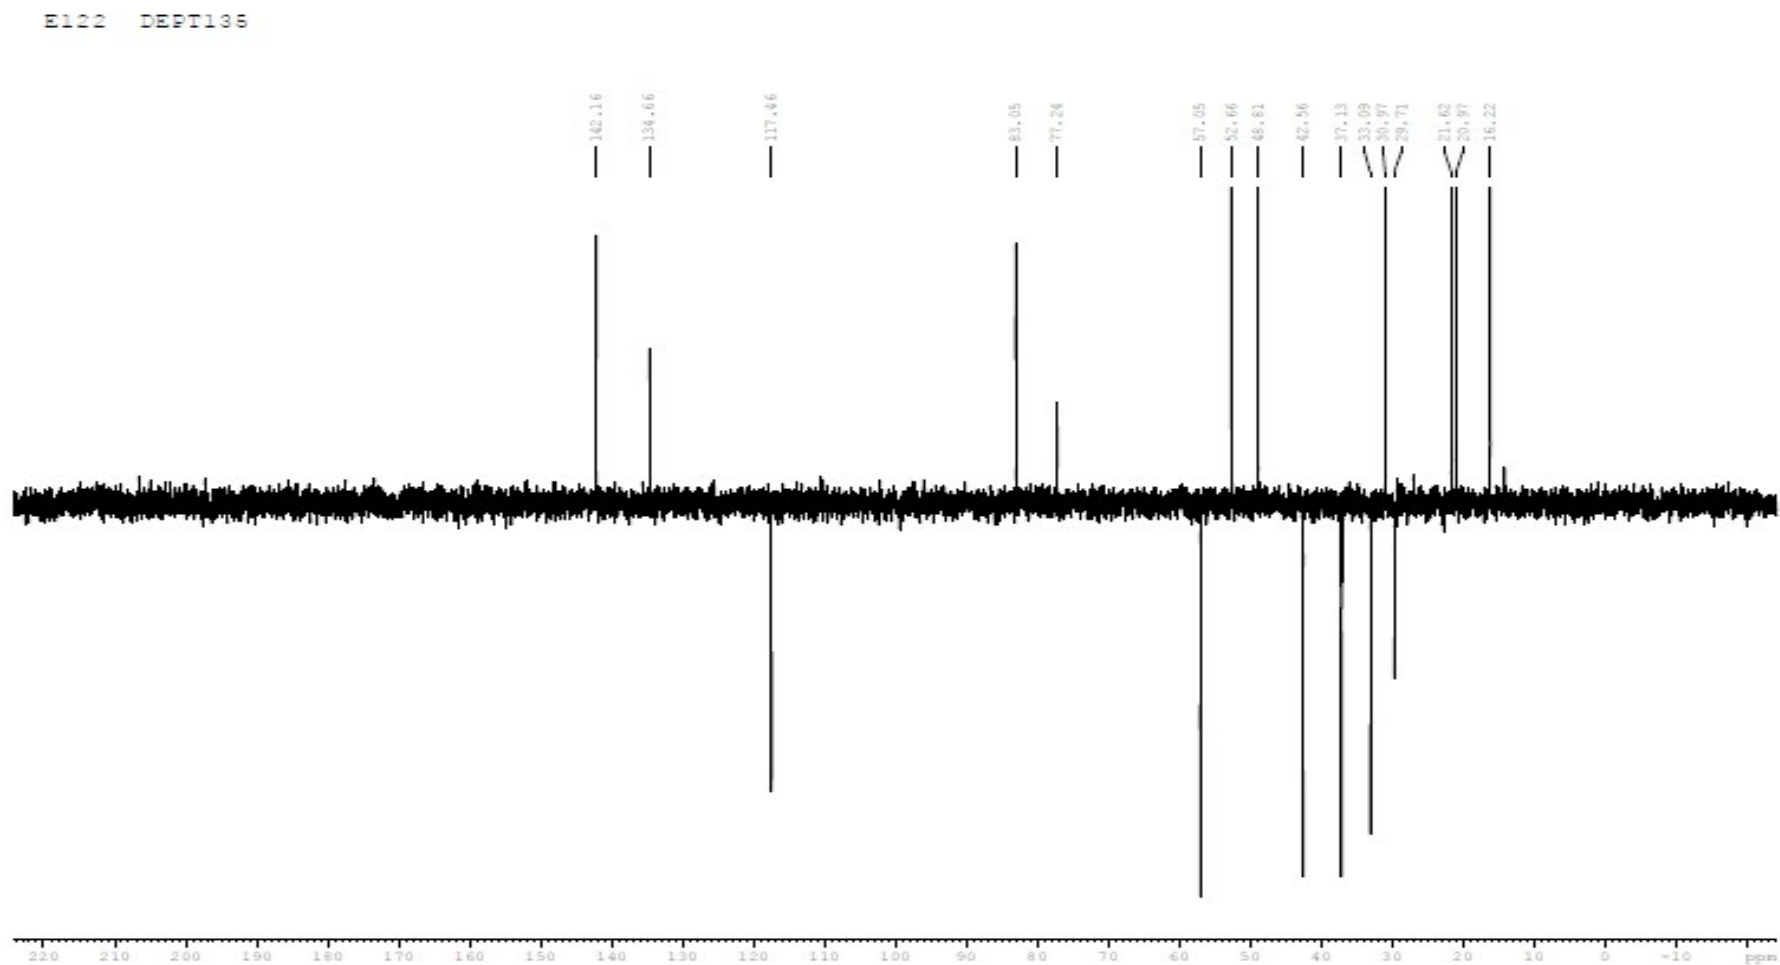

**Figure S27**  $^1\text{H}$ - $^1\text{H}$  COSY NMR spectrum of compound **3** (500 MHz,  $\text{CDCl}_3$ )

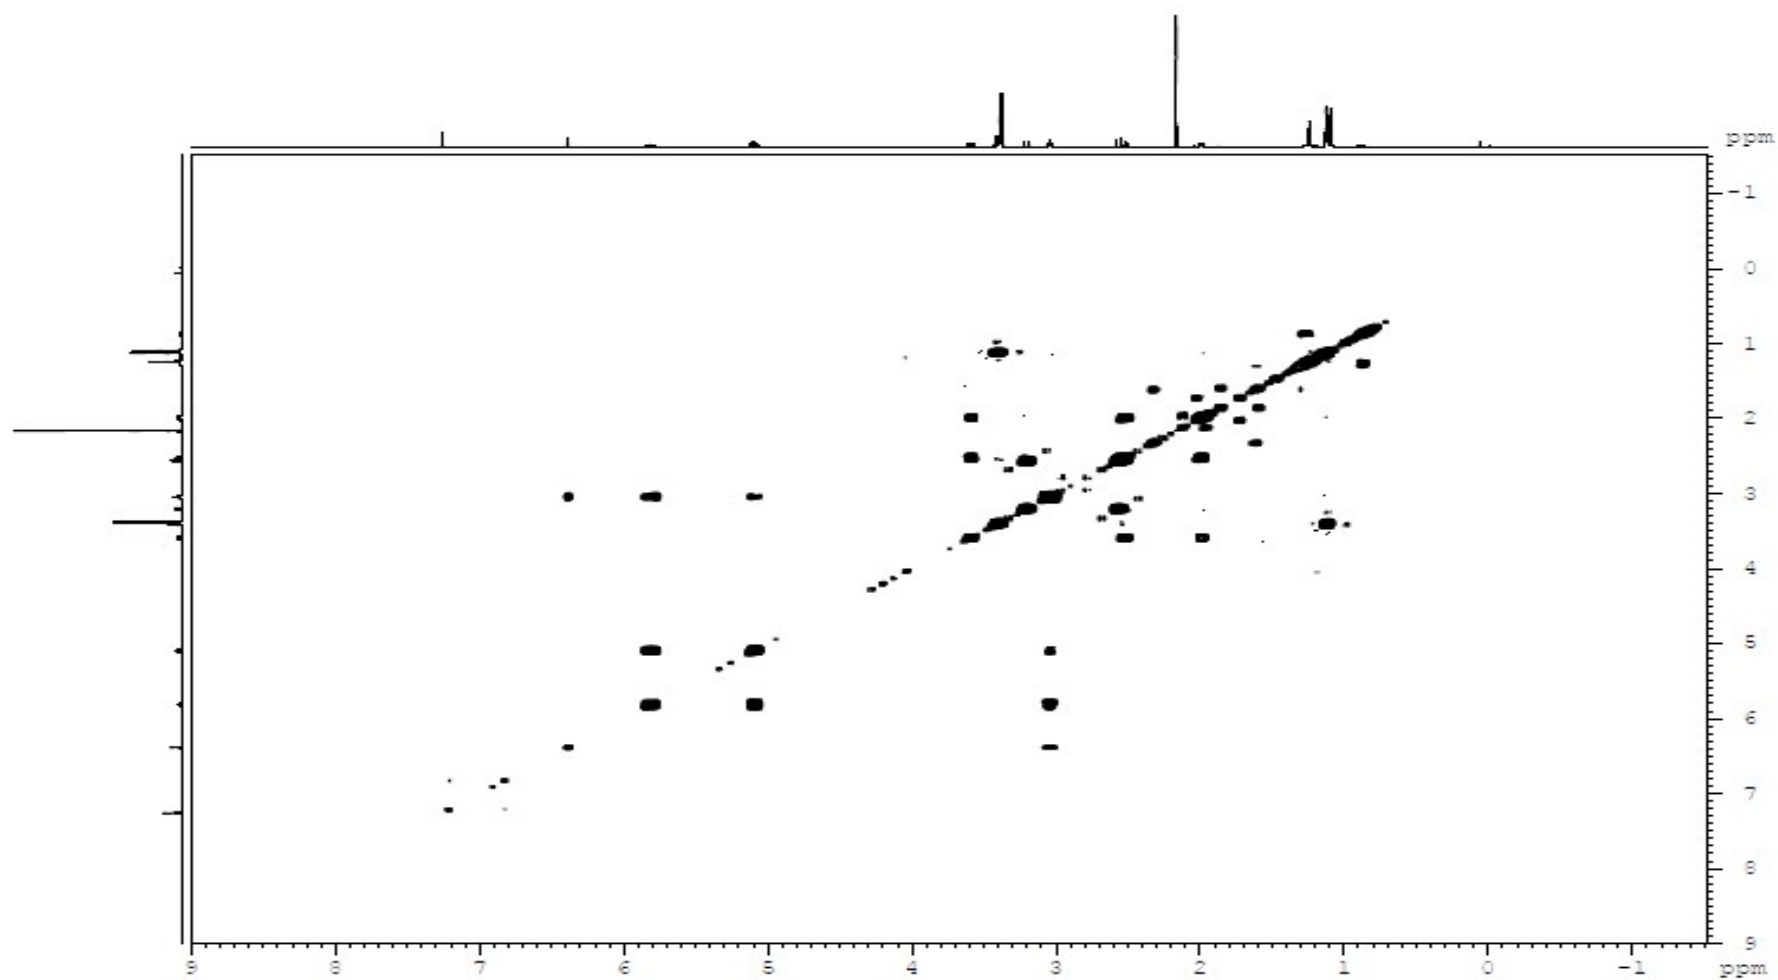

**Figure S28** HSQC NMR spectrum of compound **3** (500 MHz, CDCl<sub>3</sub>)

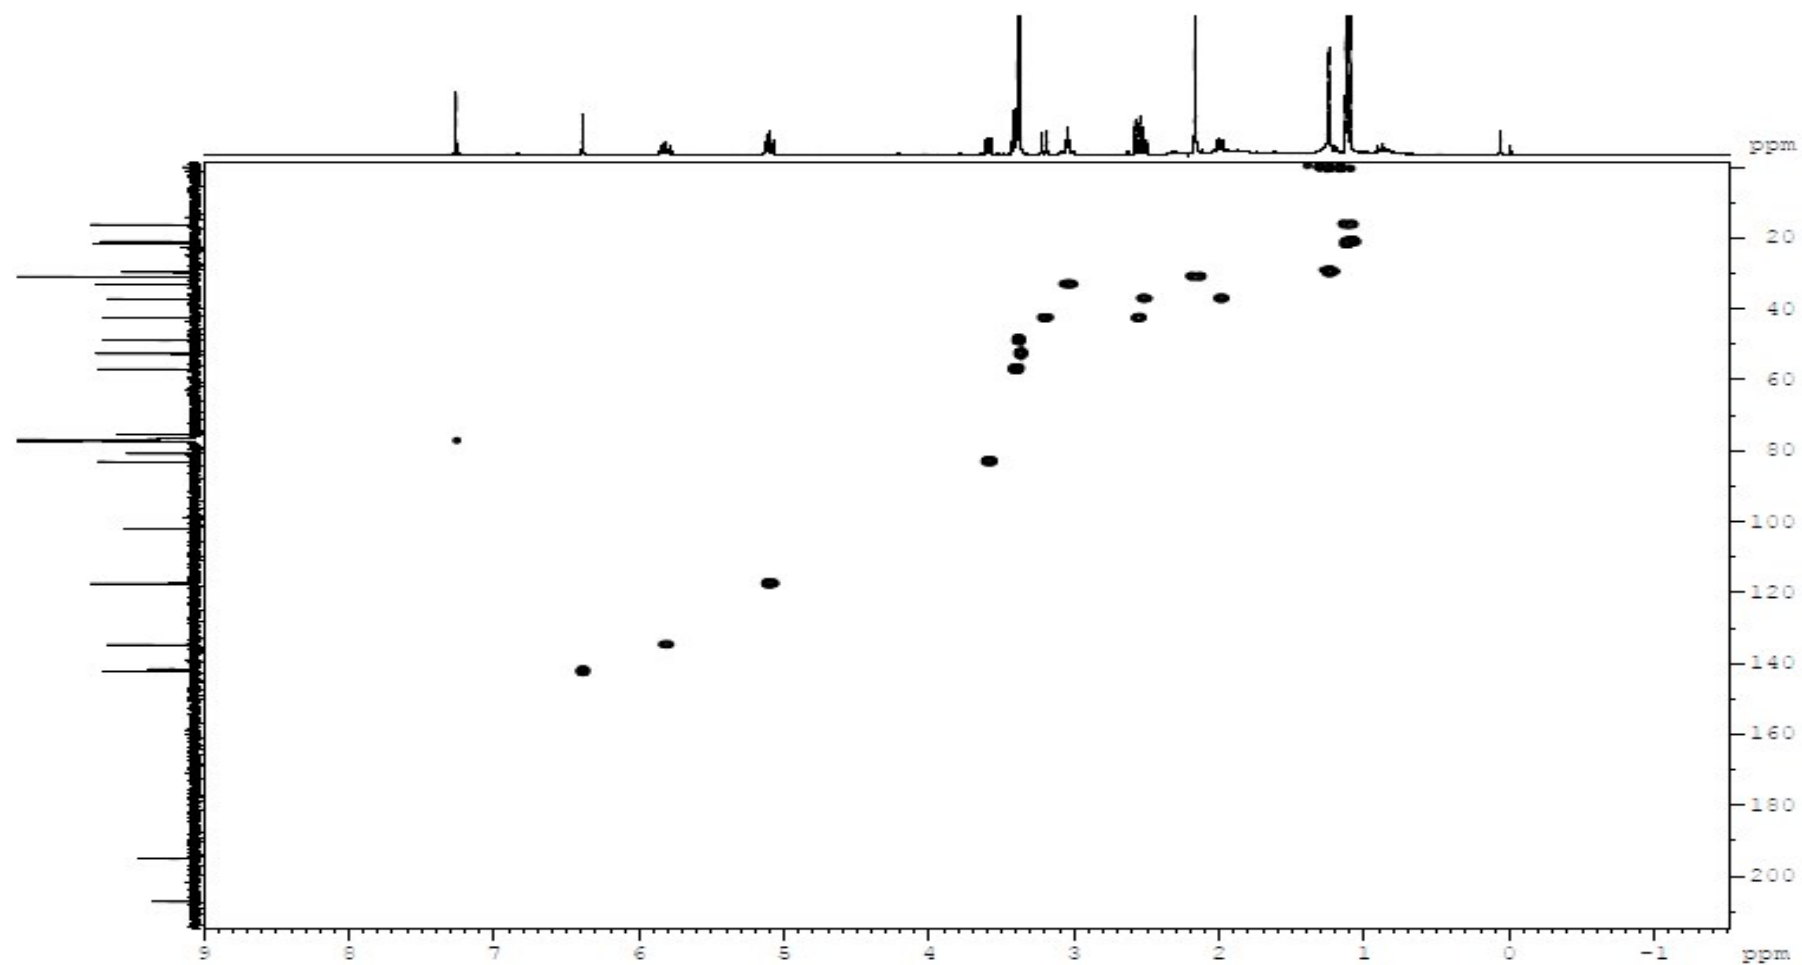

**Figure S29** HMBC NMR spectrum of compound **3** (500 MHz, CDCl<sub>3</sub>)

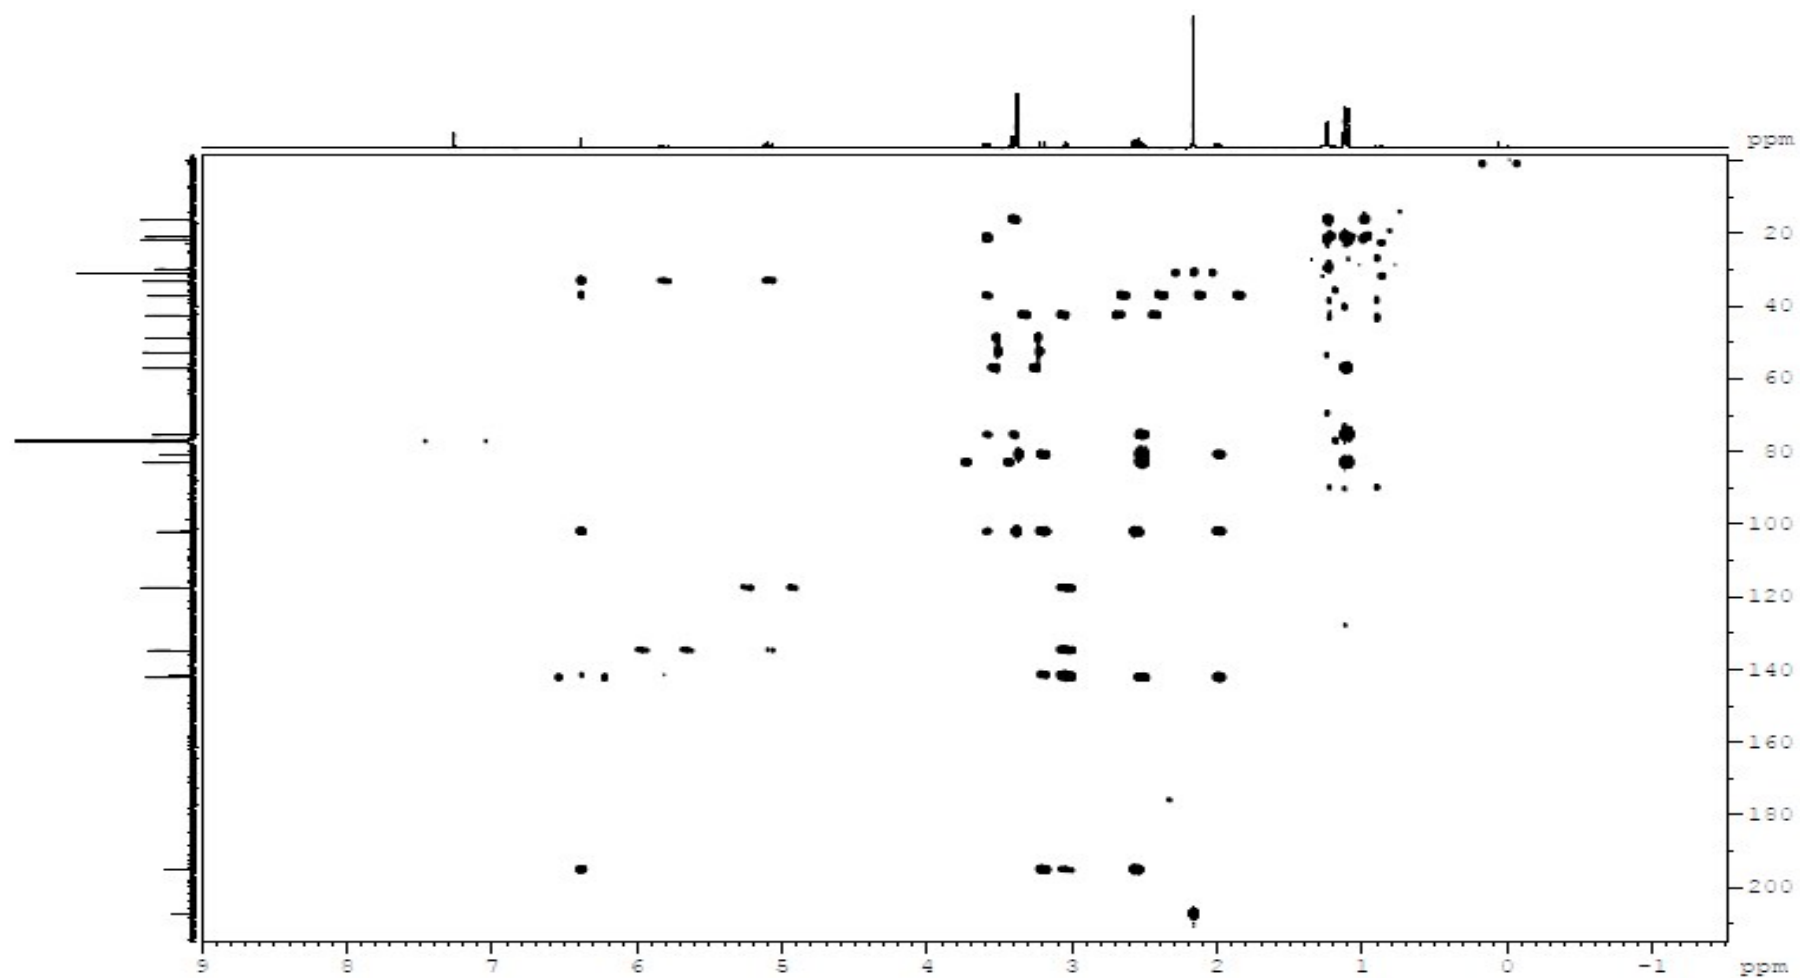



**Figure S30** NOESY NMR spectrum of compound **3** (500 MHz,  $\text{CDCl}_3$ )

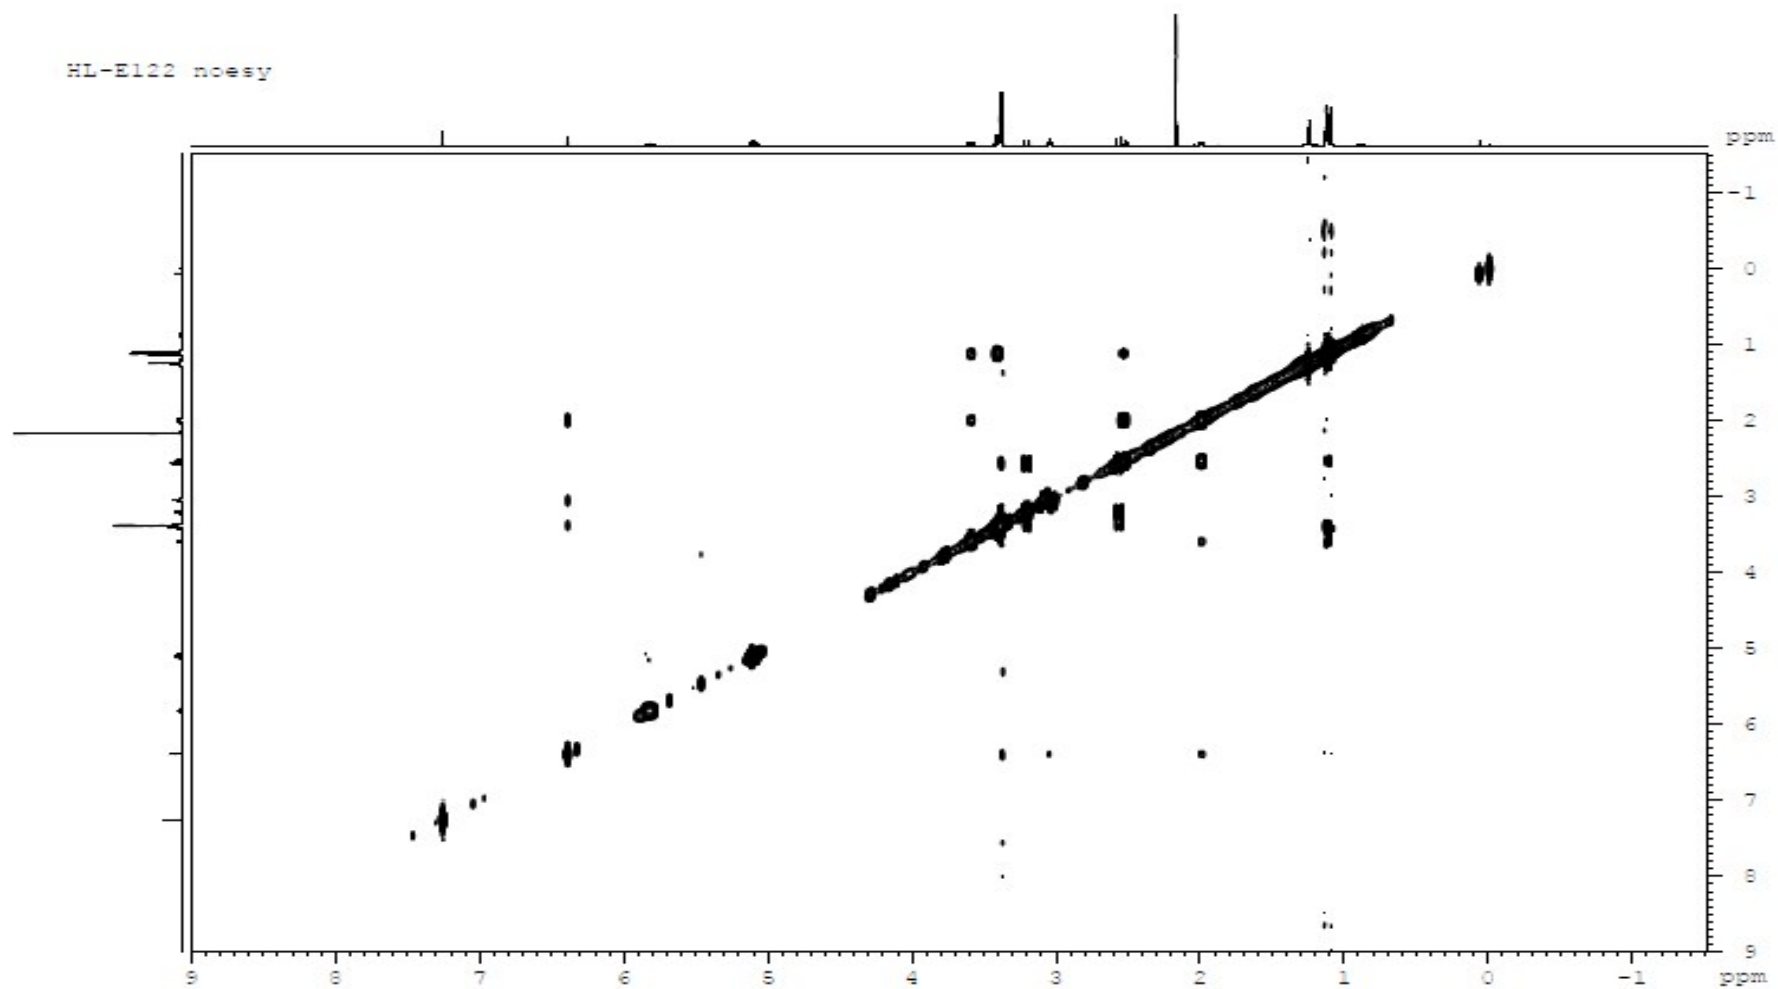

**Figure S31** HRESIMS spectrum of compound **4**

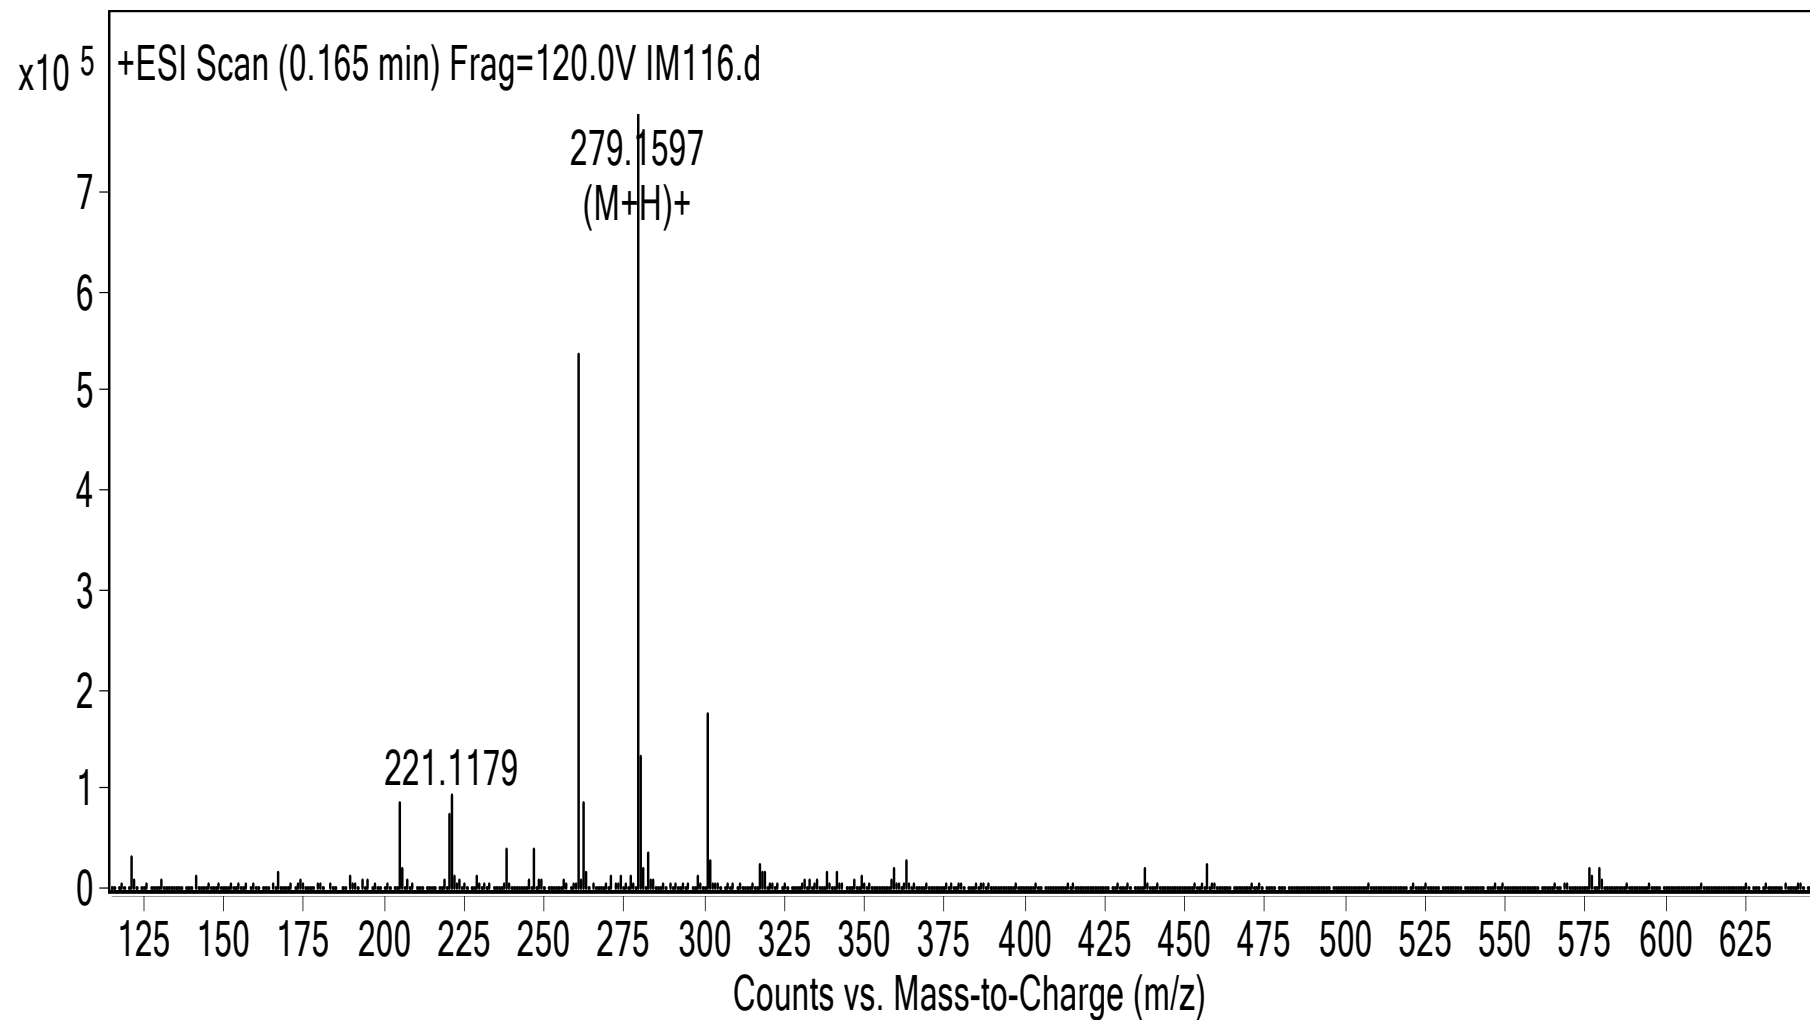

**Figure S32** CD spectrum of compound **4**

File : IM116.dsx  
Property : Circular Dichroism

Thursday, January 21, 2016

1

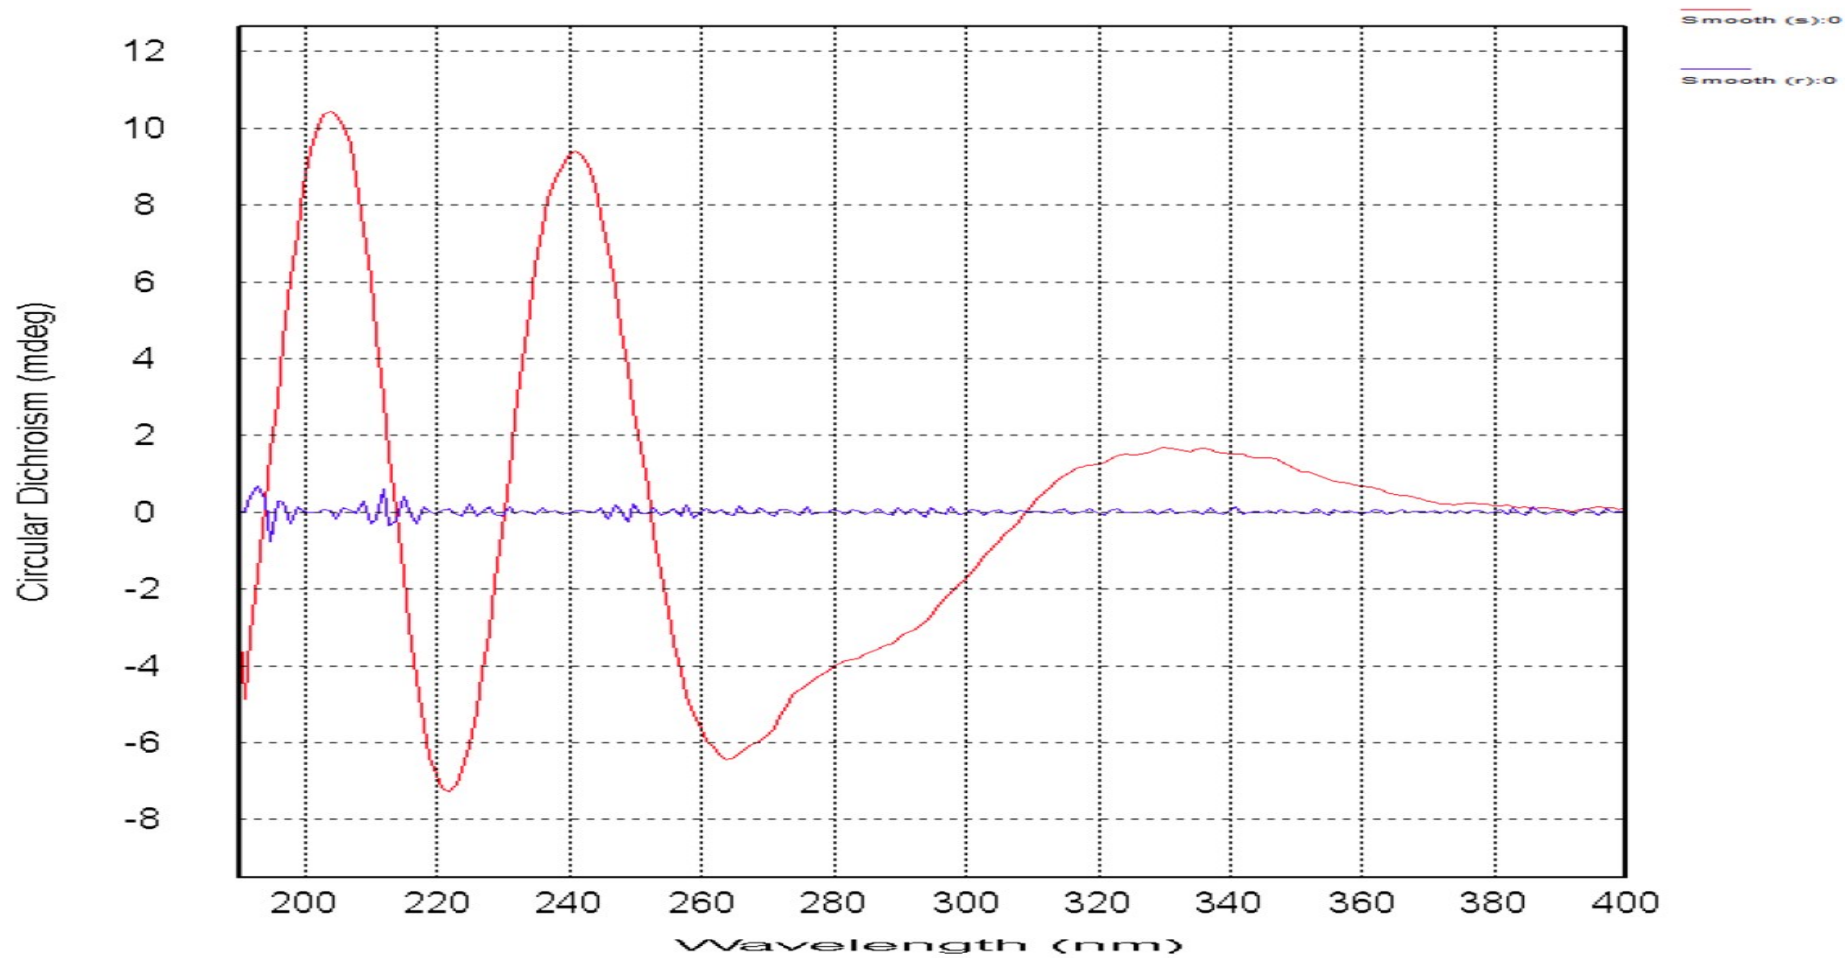

**Figure S33**  $^1\text{H}$  NMR spectrum of compound **4** (500 MHz,  $\text{CDCl}_3$ )

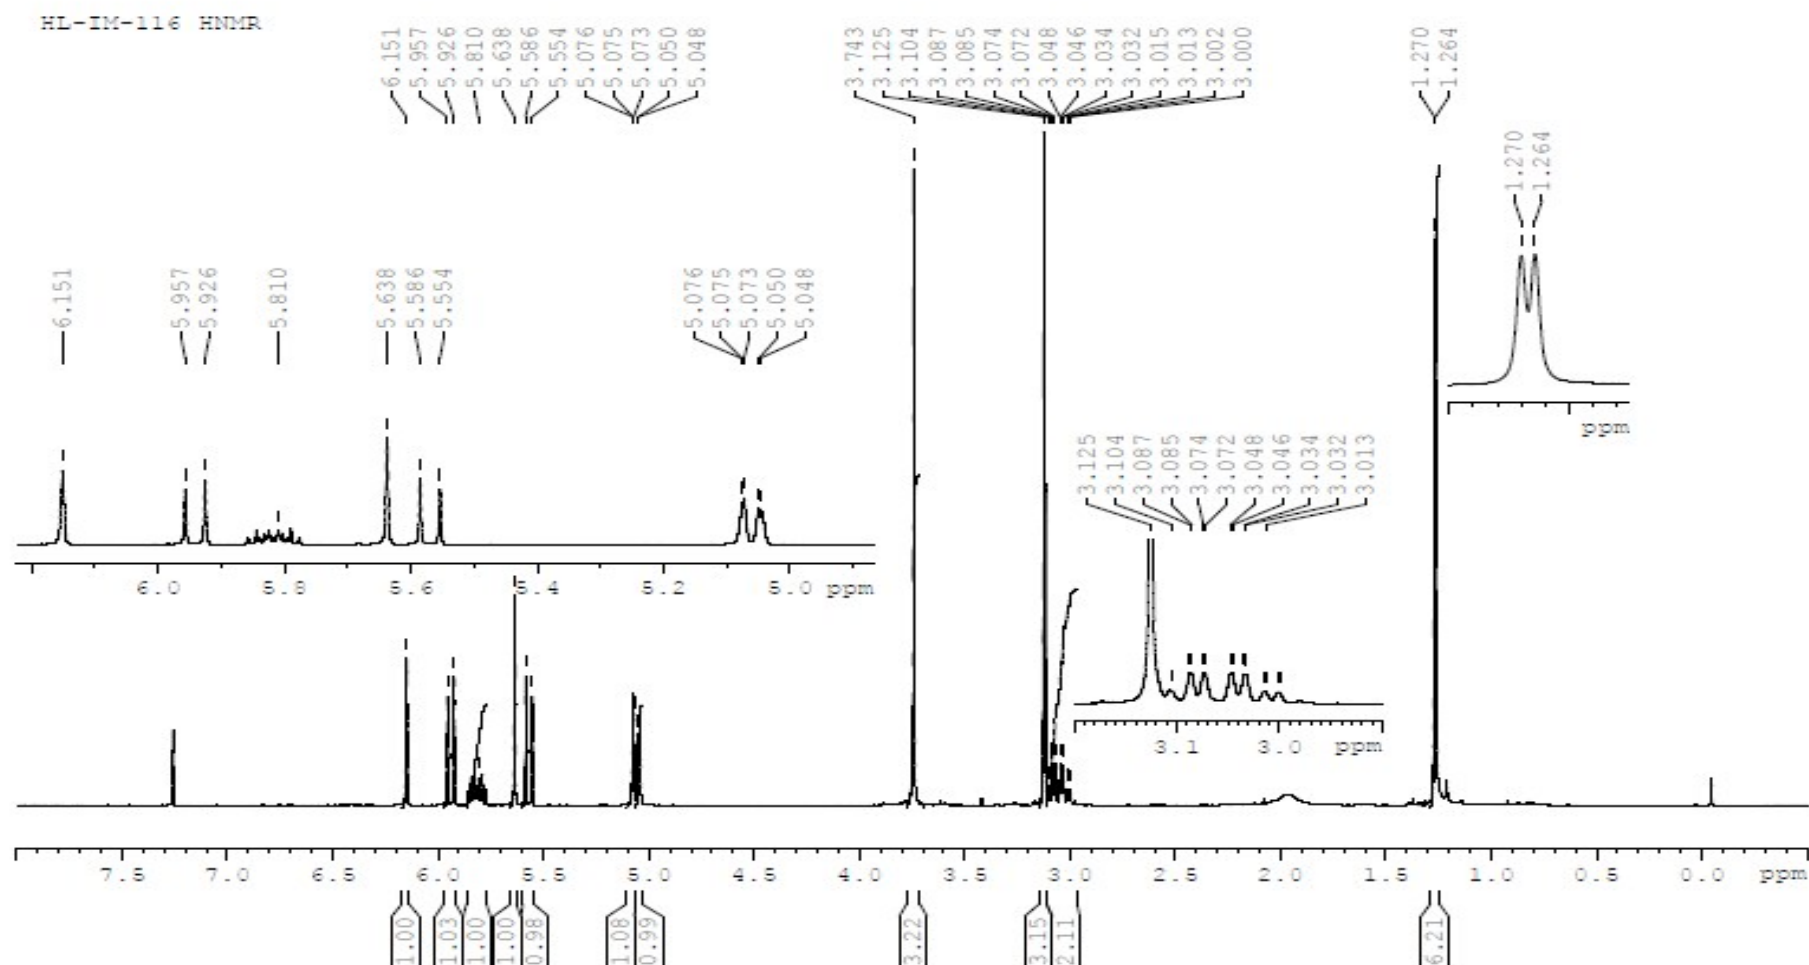

**Figure S34**  $^{13}\text{C}$  NMR spectrum of compound **4** (125 MHz,  $\text{CDCl}_3$ )

HL-IM-116 C13 NMR

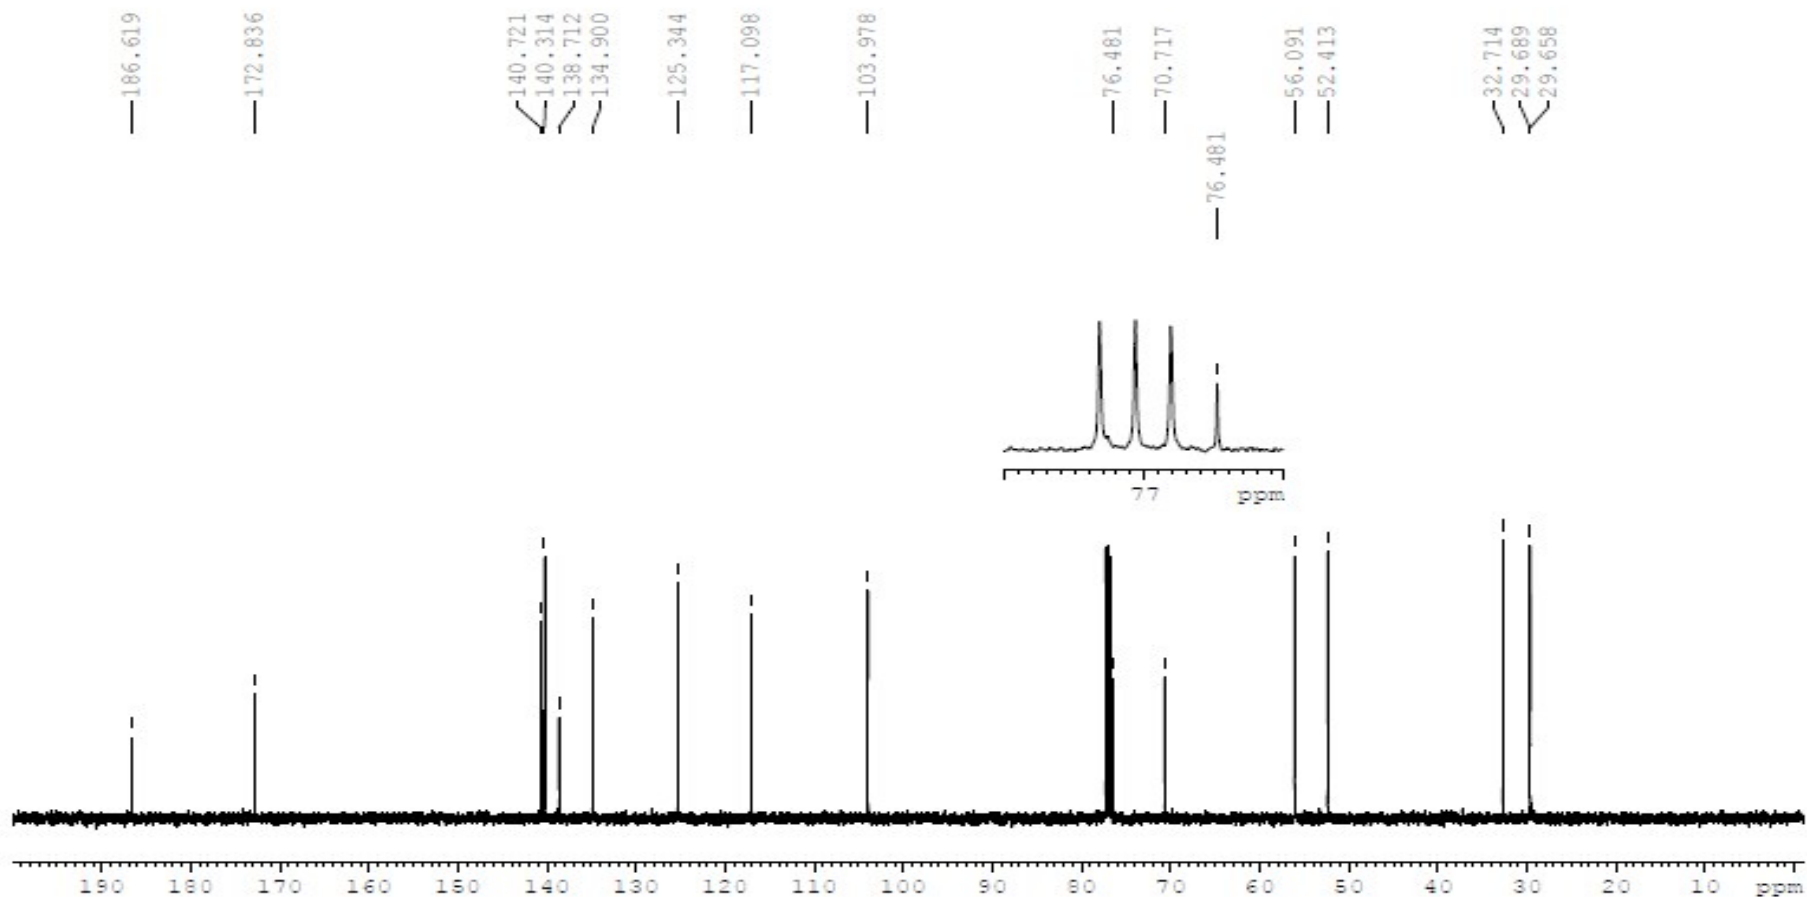

**Figure S35** DEPT NMR spectrum of compound **4** (125 MHz, CDCl<sub>3</sub>)

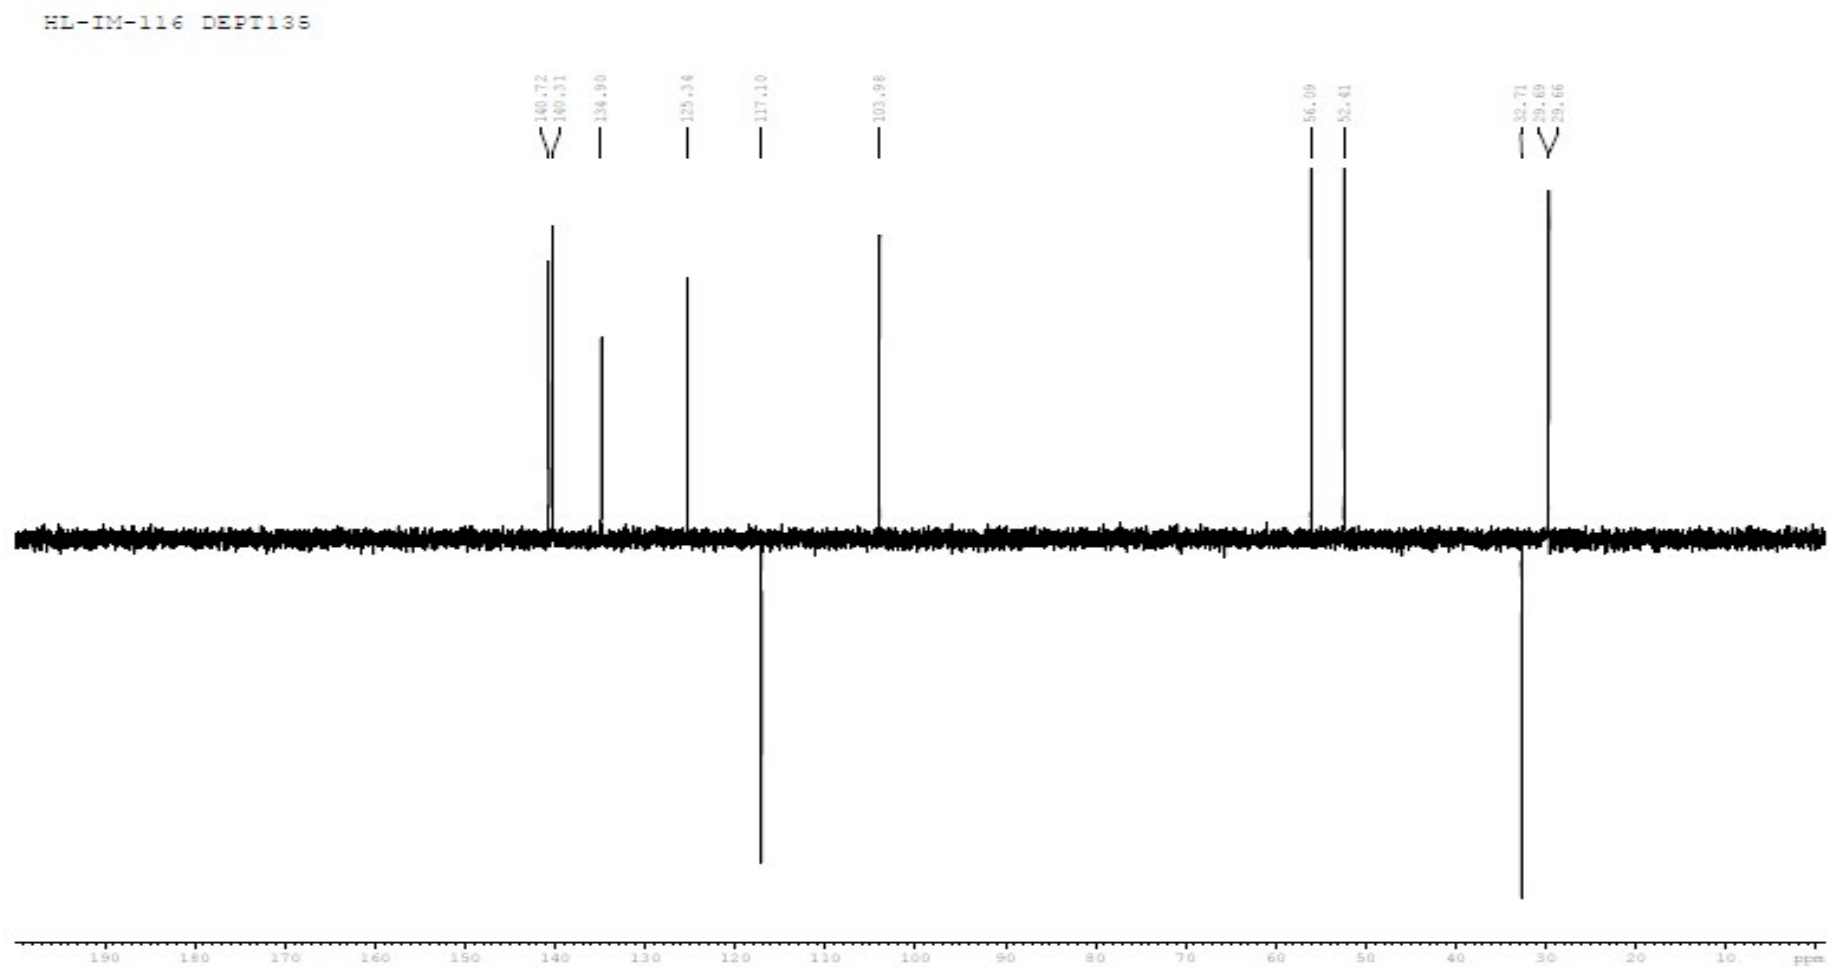

**Figure S36**  $^1\text{H}$ - $^1\text{H}$  COSY NMR spectrum of compound **4** (500 MHz,  $\text{CDCl}_3$ )

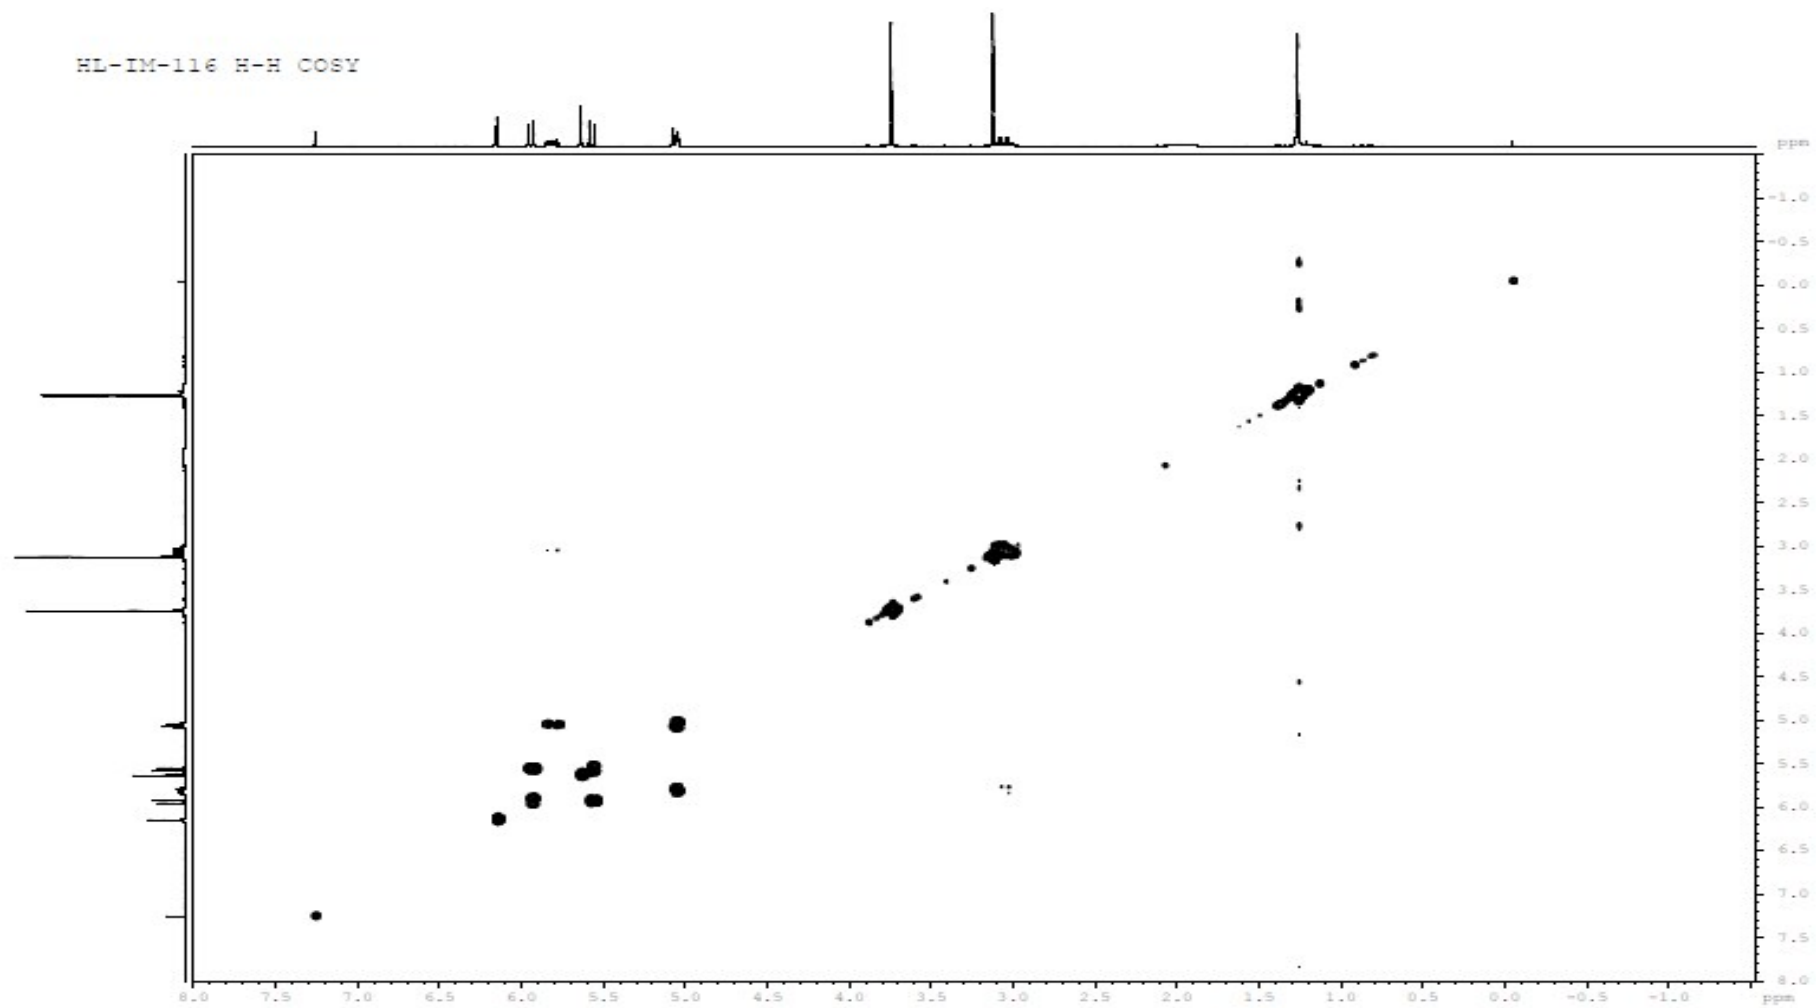

**Figure S37** HSQC NMR spectrum of compound **4** (500 MHz, CDCl<sub>3</sub>)

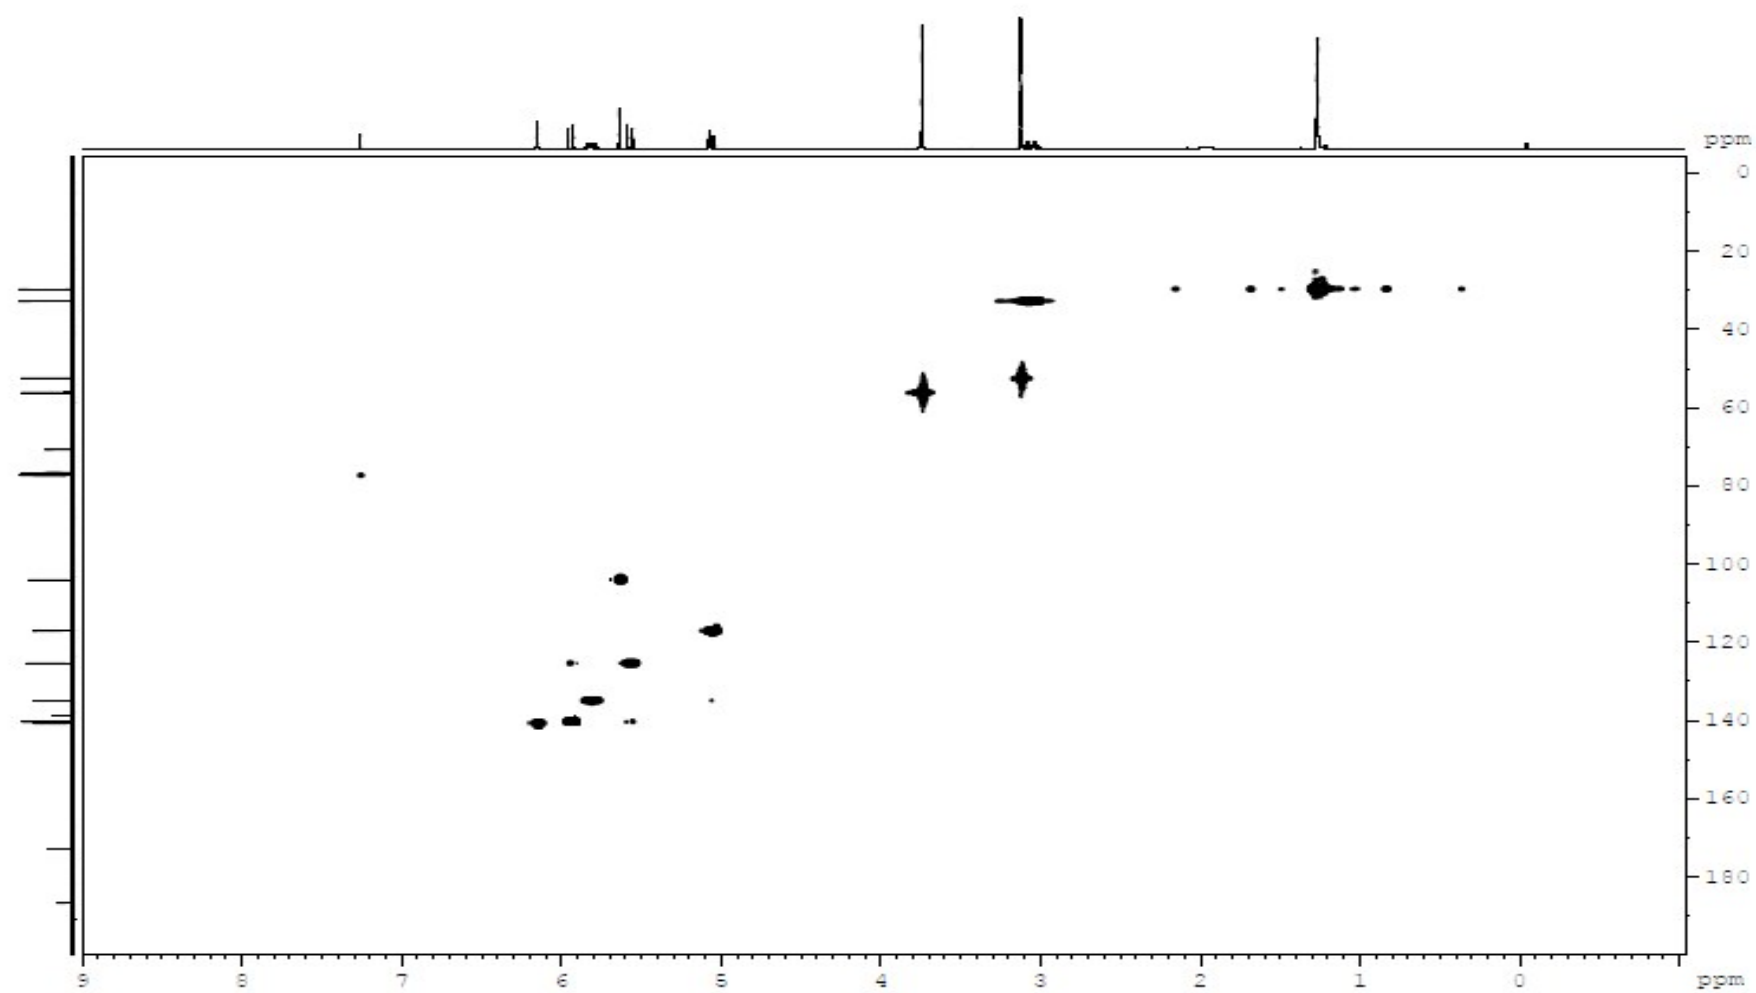



**Figure S38** HMBC NMR spectrum of compound **4** (500 MHz, CDCl<sub>3</sub>)

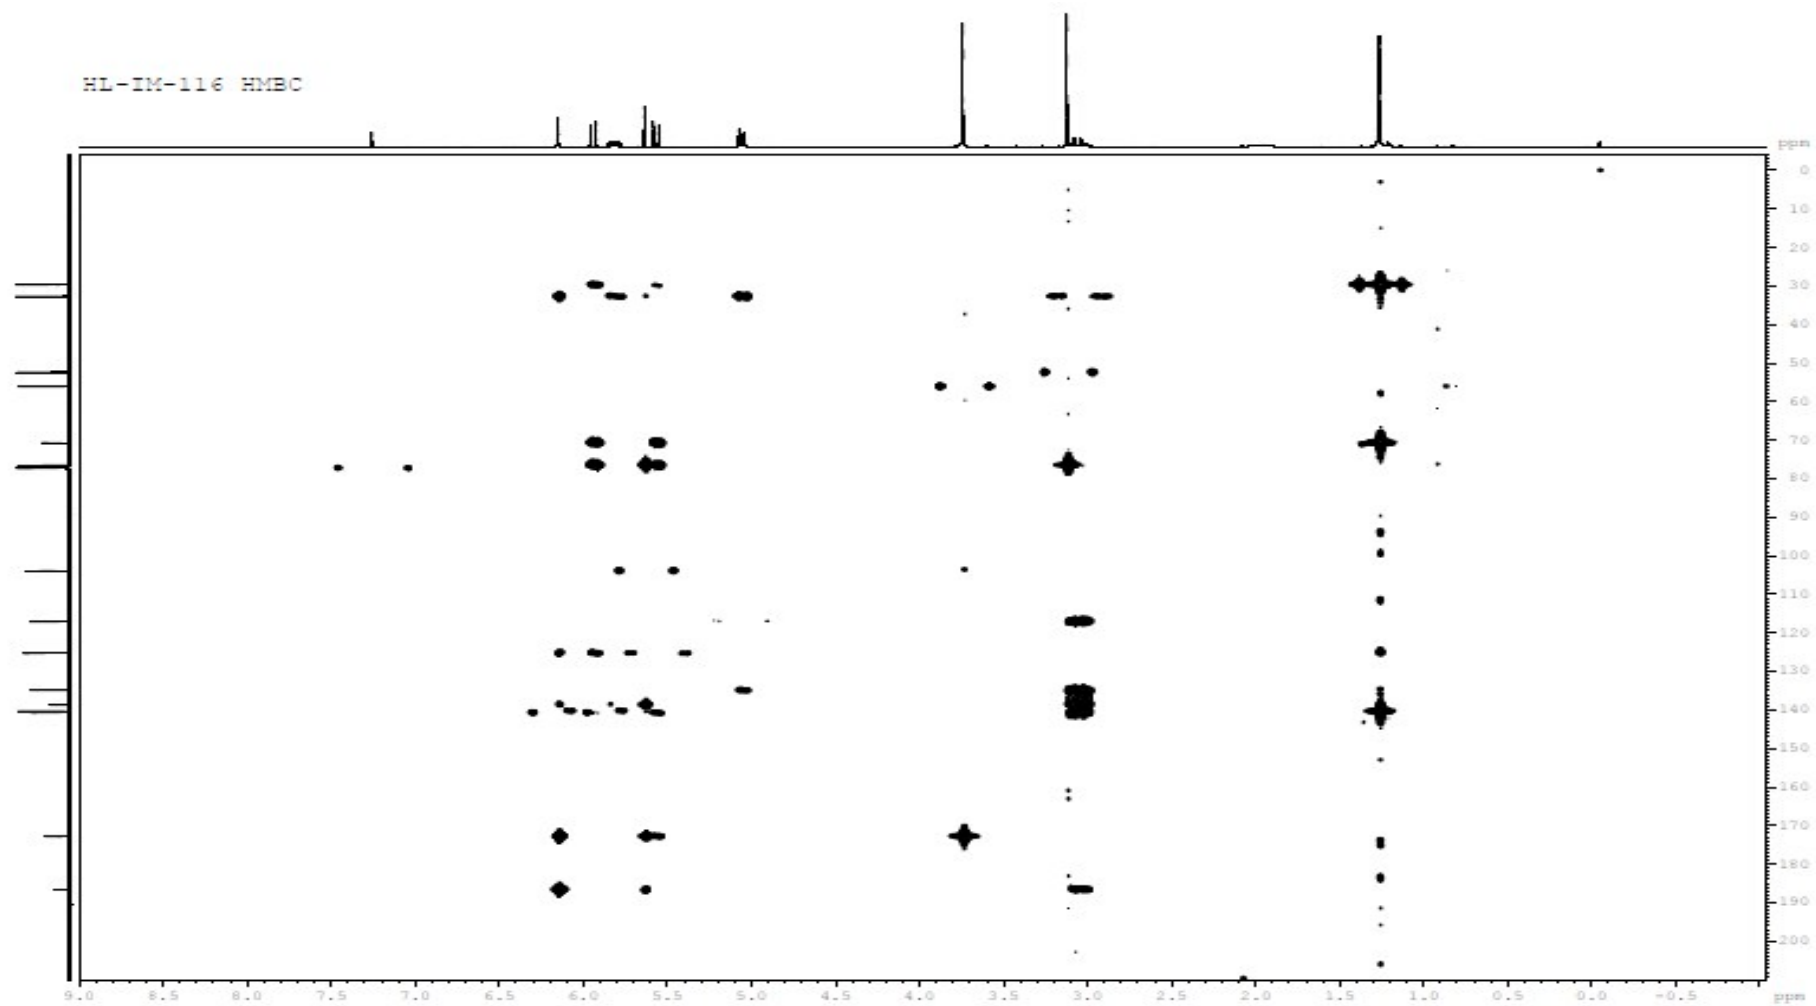

**Figure S39** NOESY NMR spectrum of compound **4** (500 MHz, CDCl<sub>3</sub>)

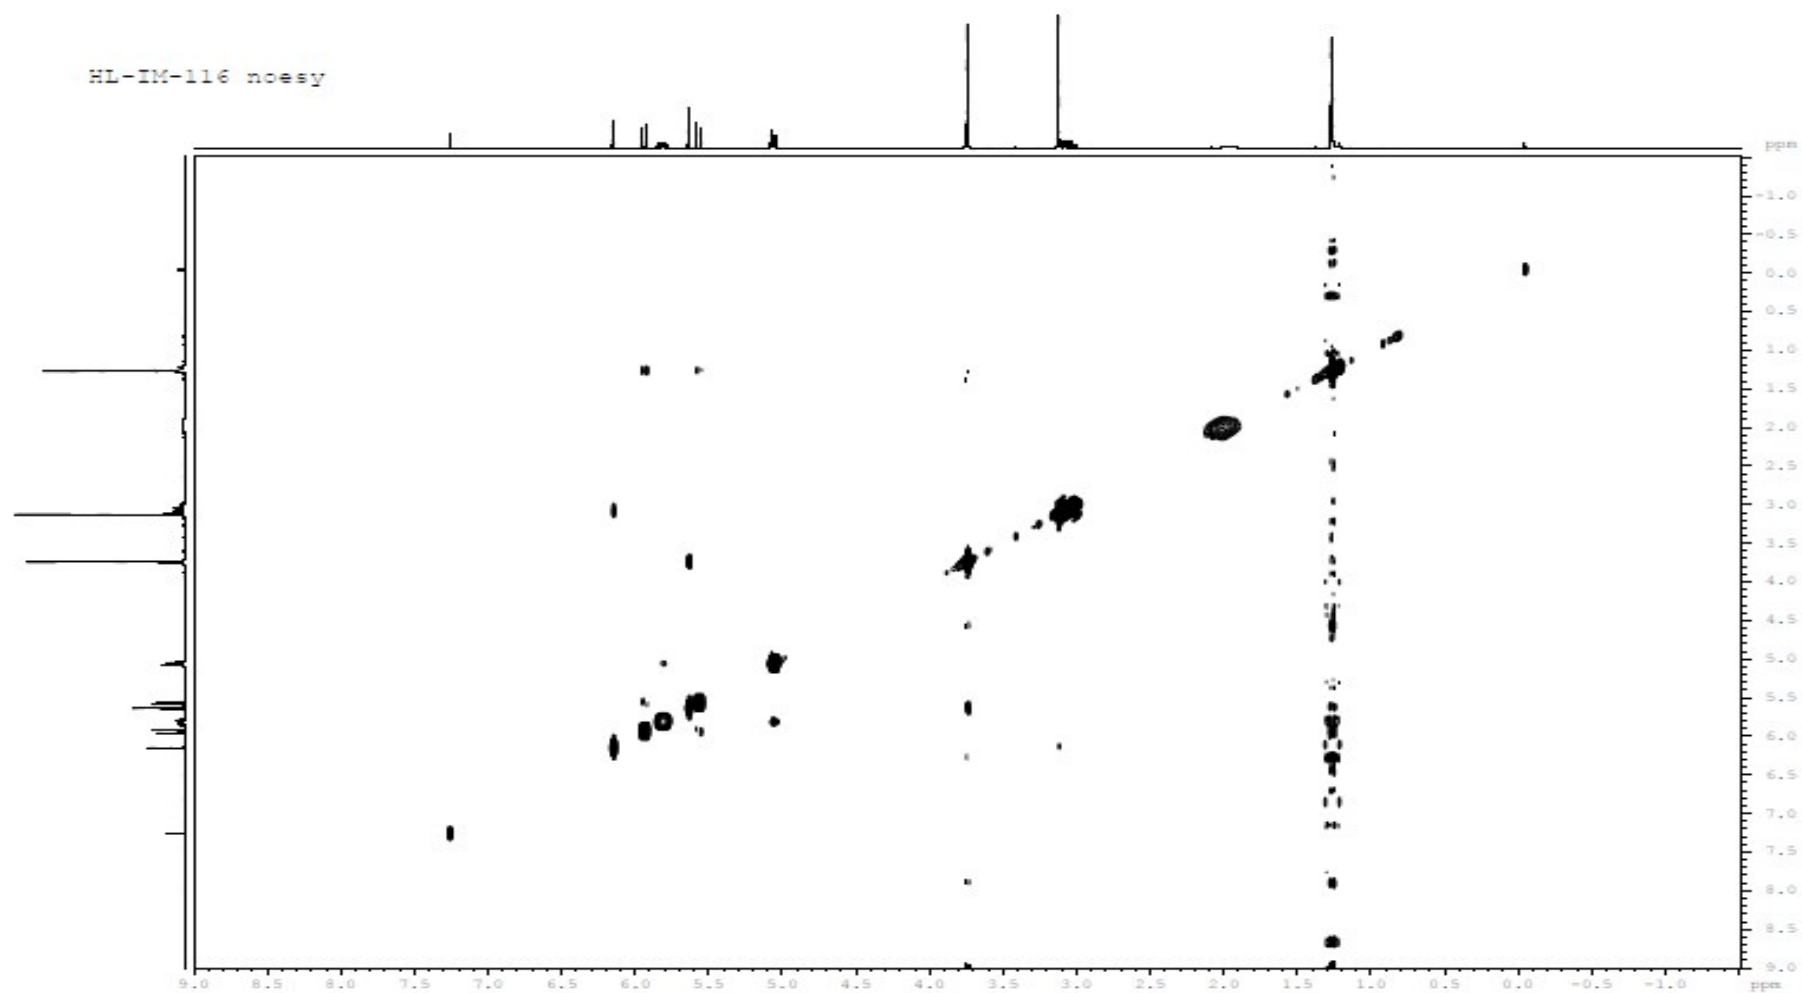

**Figure S40** HRESIMS spectrum of compound **5**

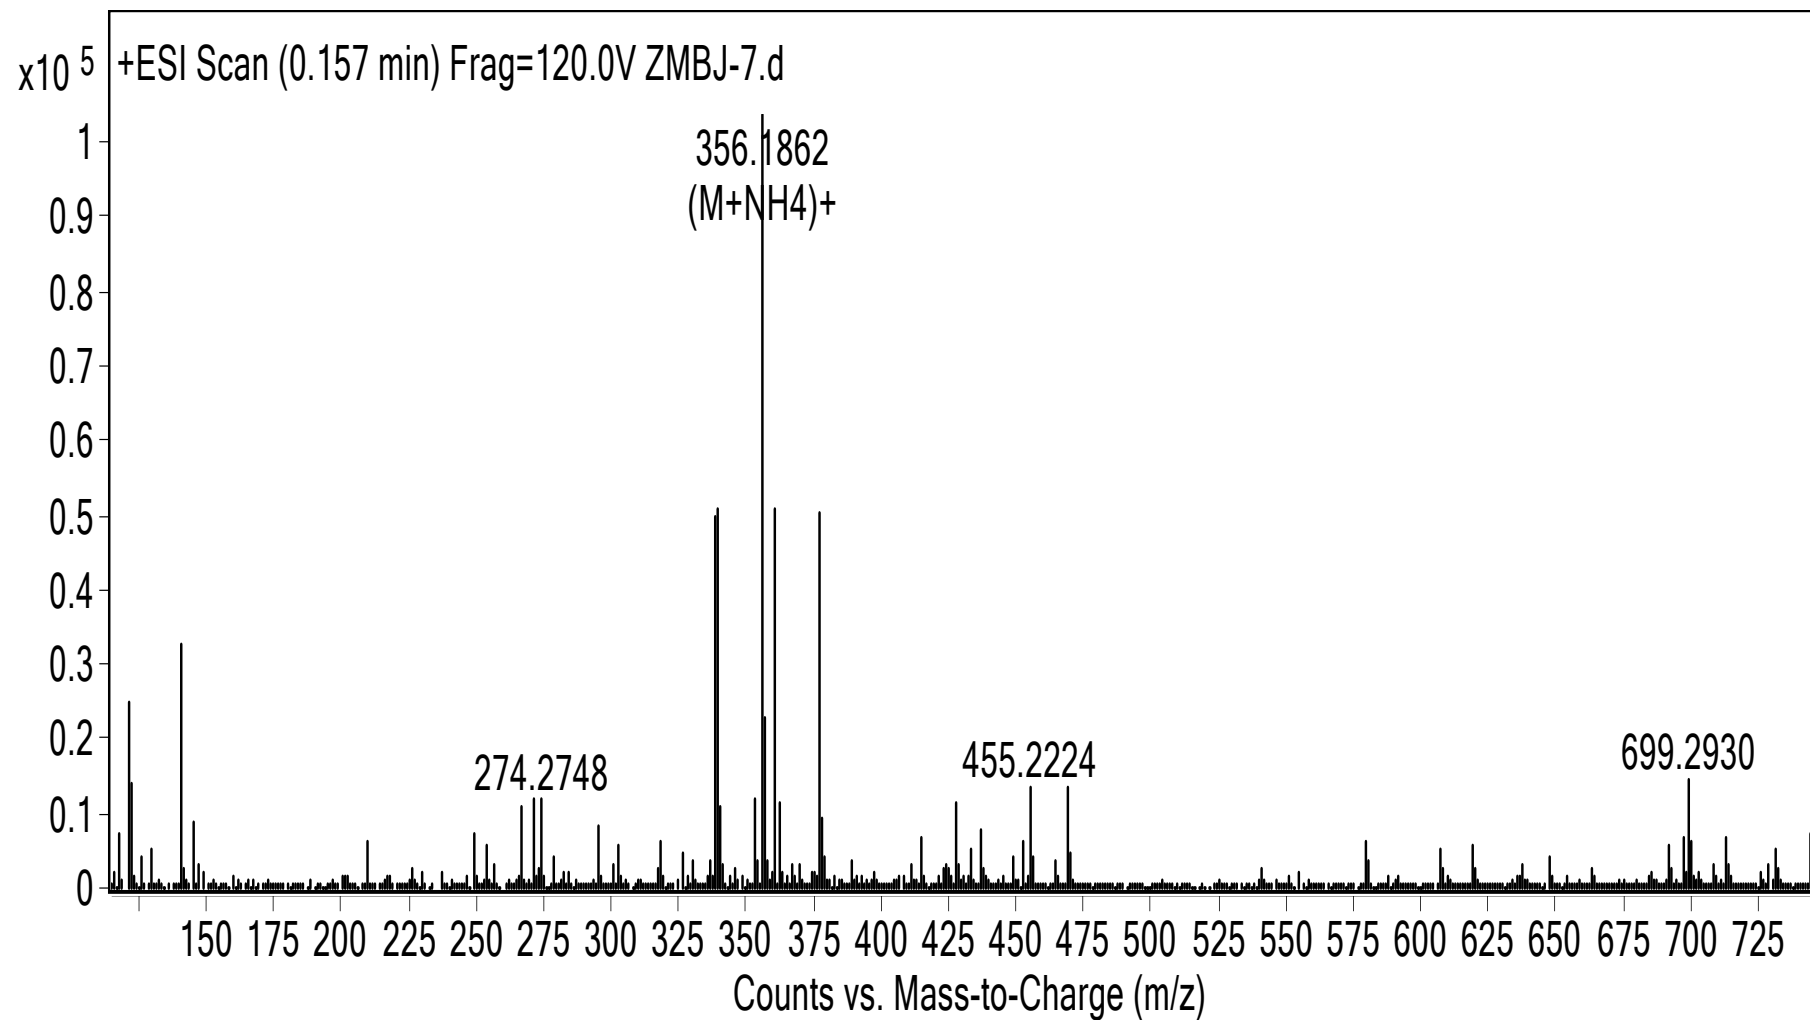

**Figure S41**  $^1\text{H}$  NMR spectrum of compound **5** (500 MHz,  $\text{CDCl}_3$ )

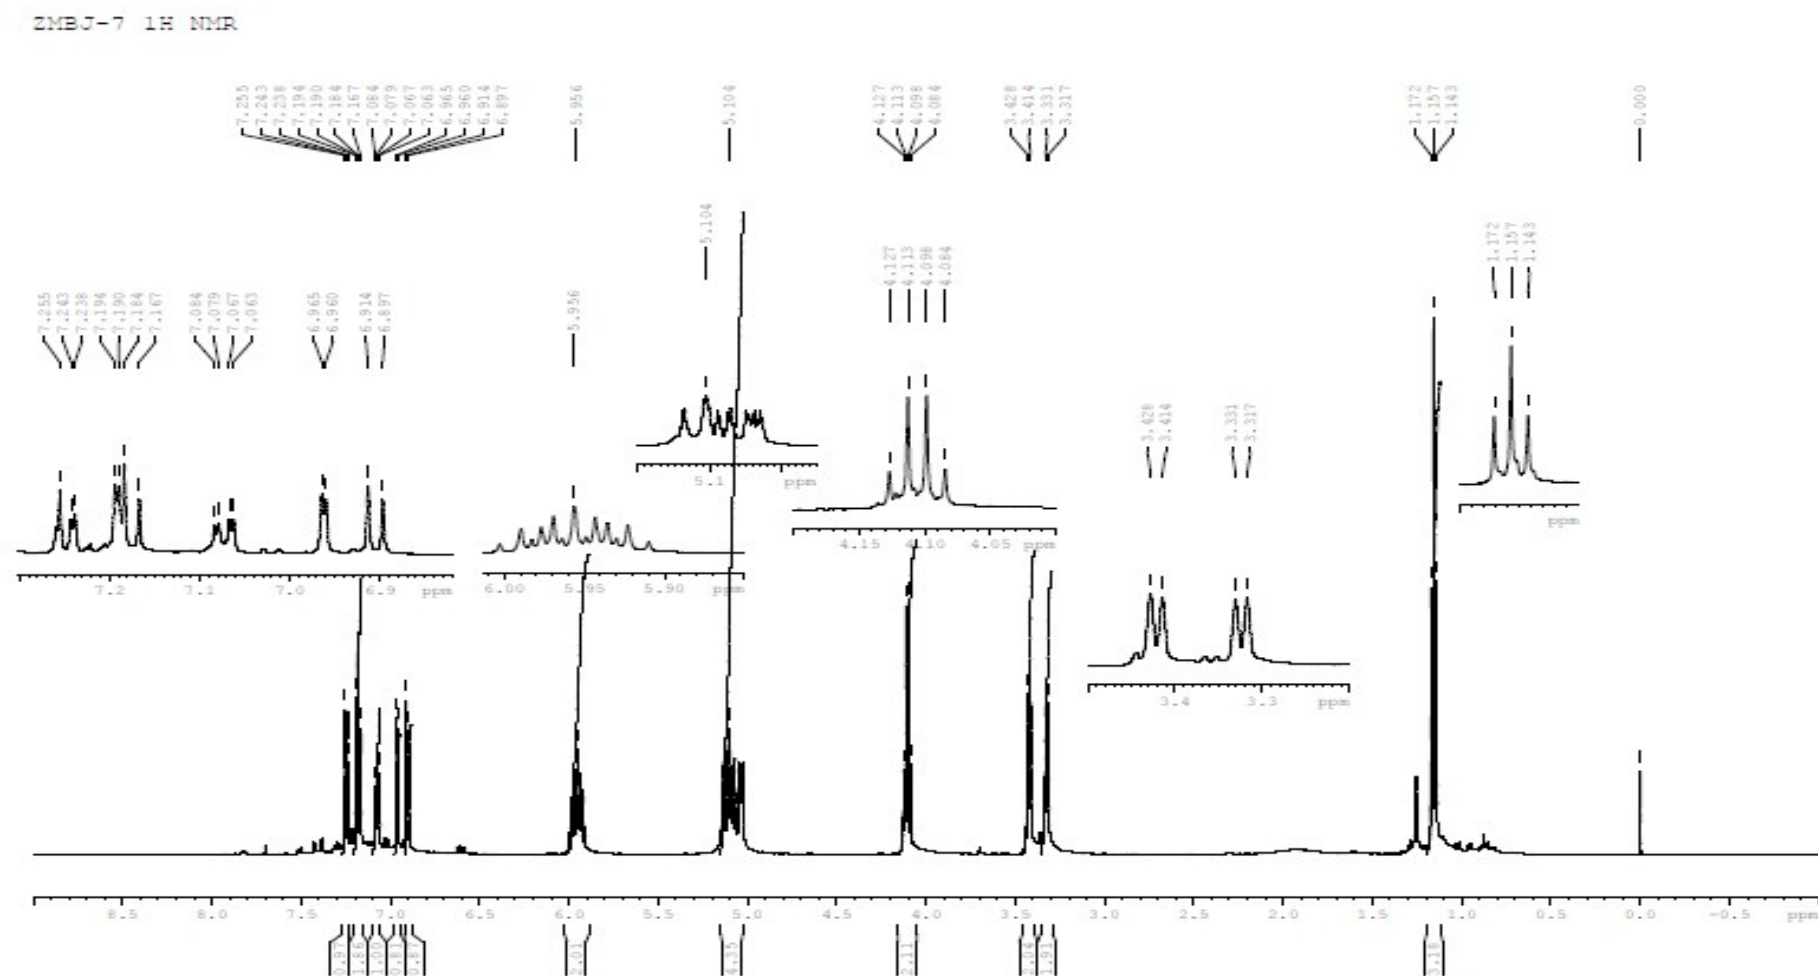

**Figure S42**  $^{13}\text{C}$  NMR spectrum of compound **5** (125 MHz,  $\text{CDCl}_3$ )

ZMBJ-7  $^{13}\text{C}$  NMR

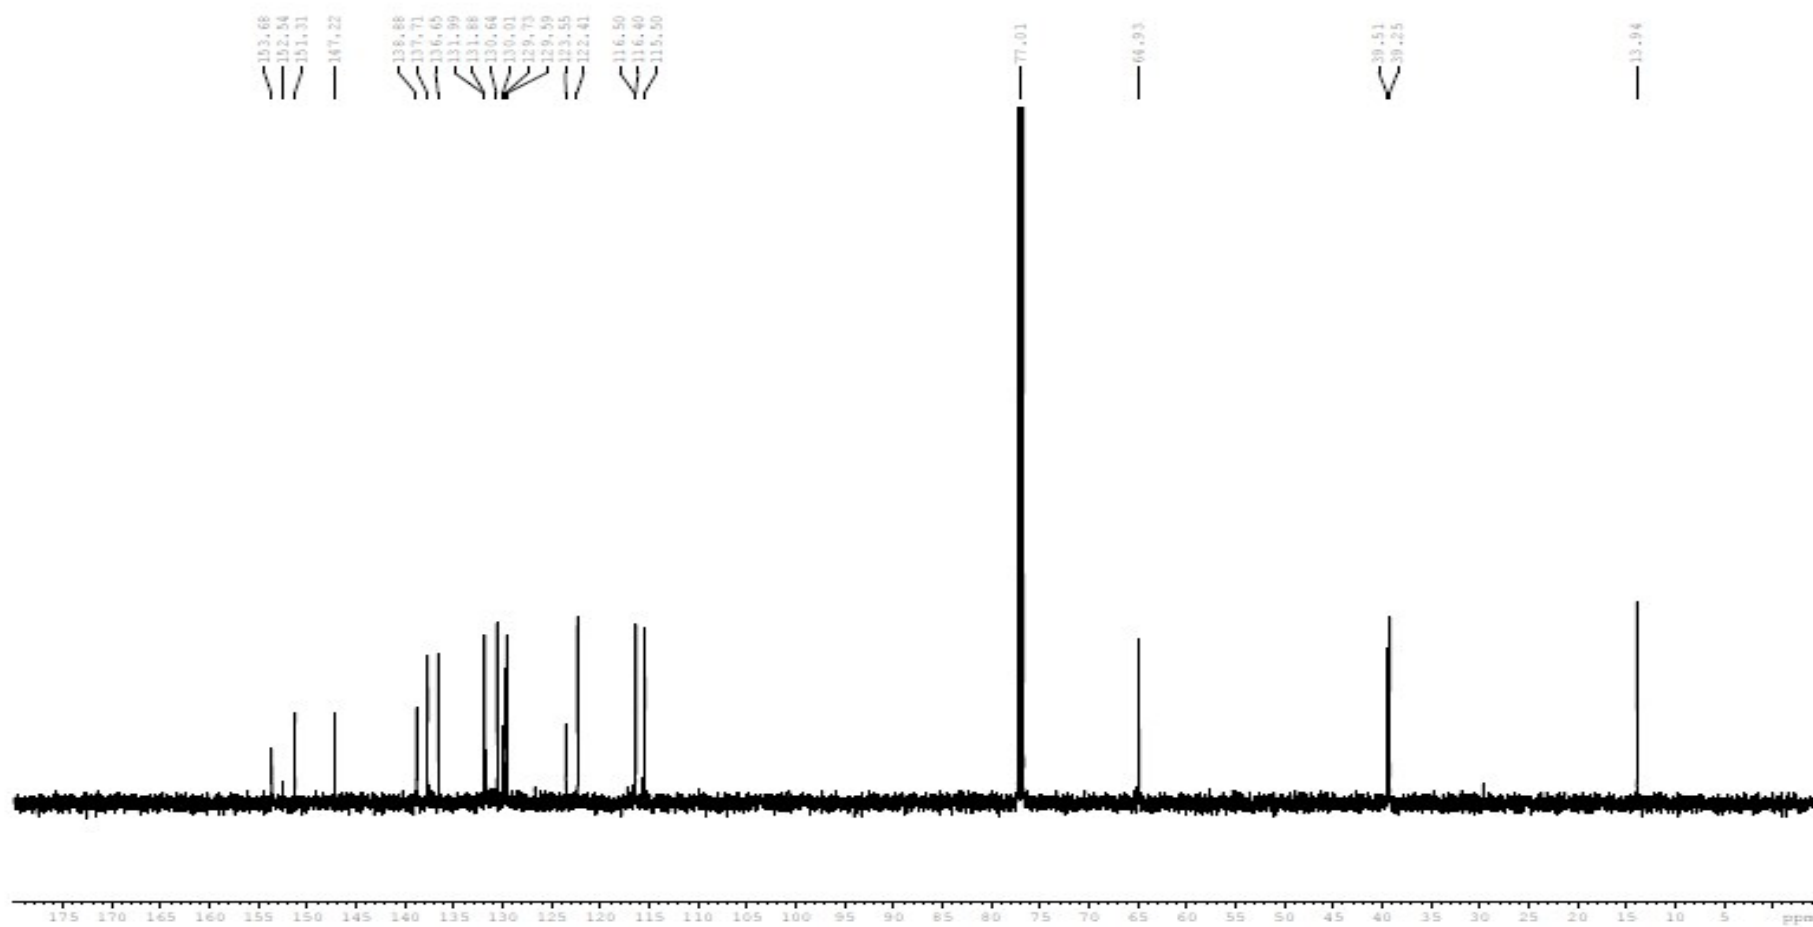

**Figure S43** DEPT NMR spectrum of compound **5** (125 MHz, CDCl<sub>3</sub>)

ZMBJ-7 136 DEPT

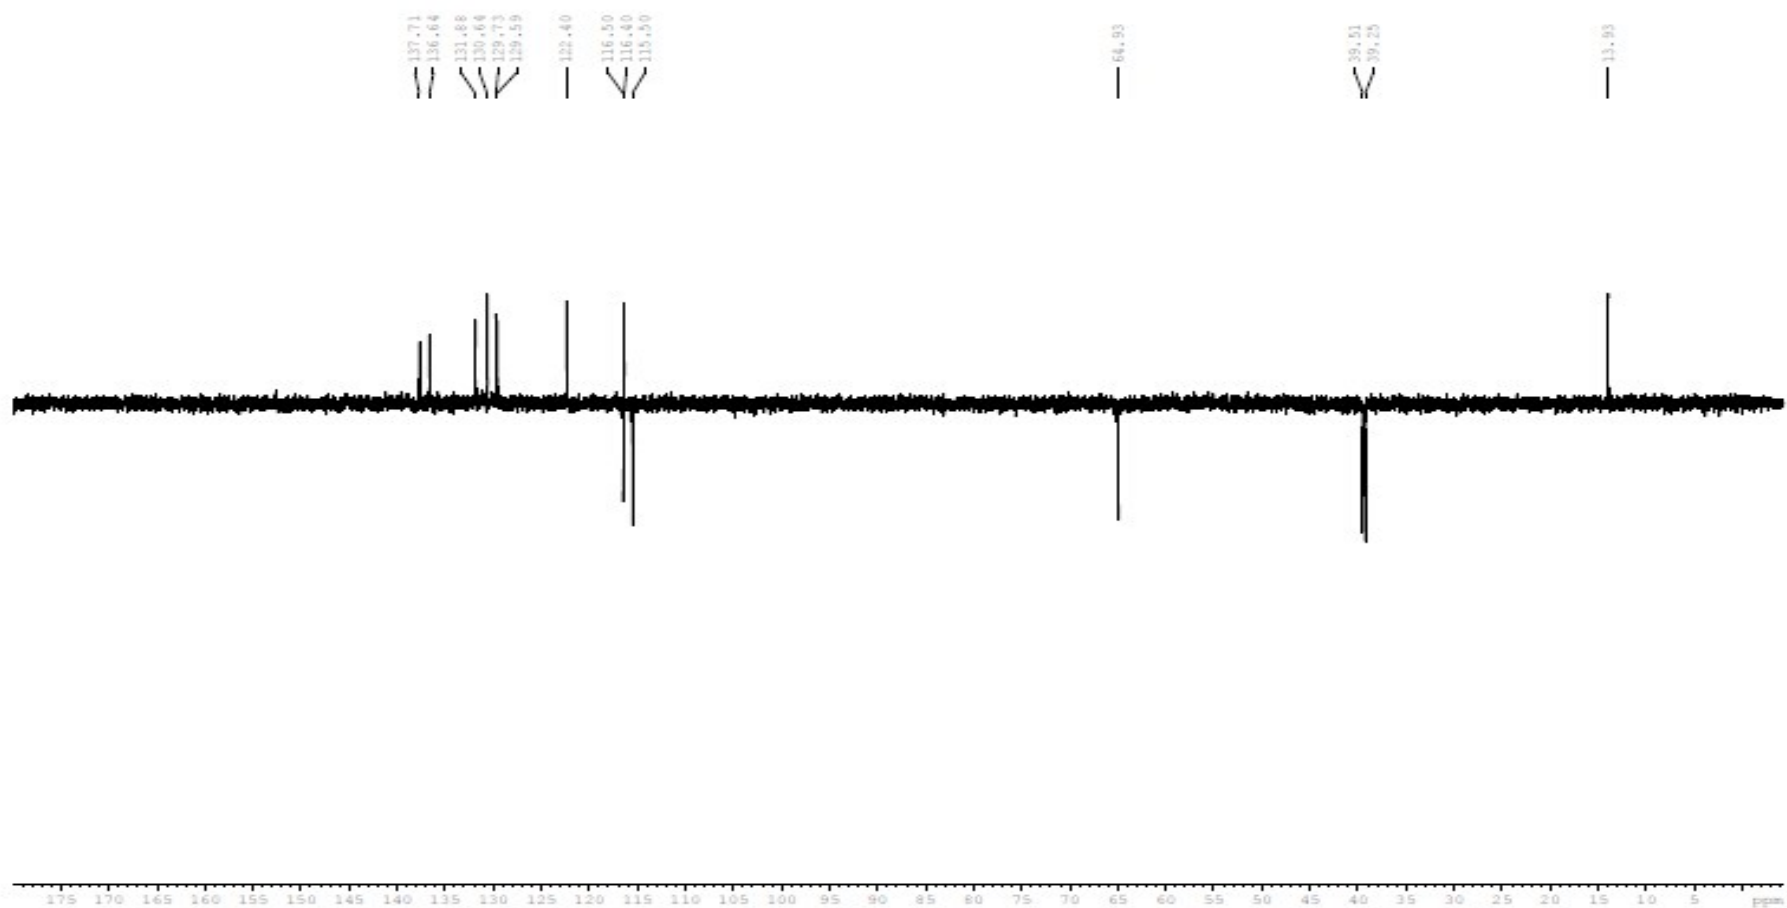

**Figure S44**  $^1\text{H}$ - $^1\text{H}$  COSY NMR spectrum of compound **5** (500 MHz,  $\text{CDCl}_3$ )

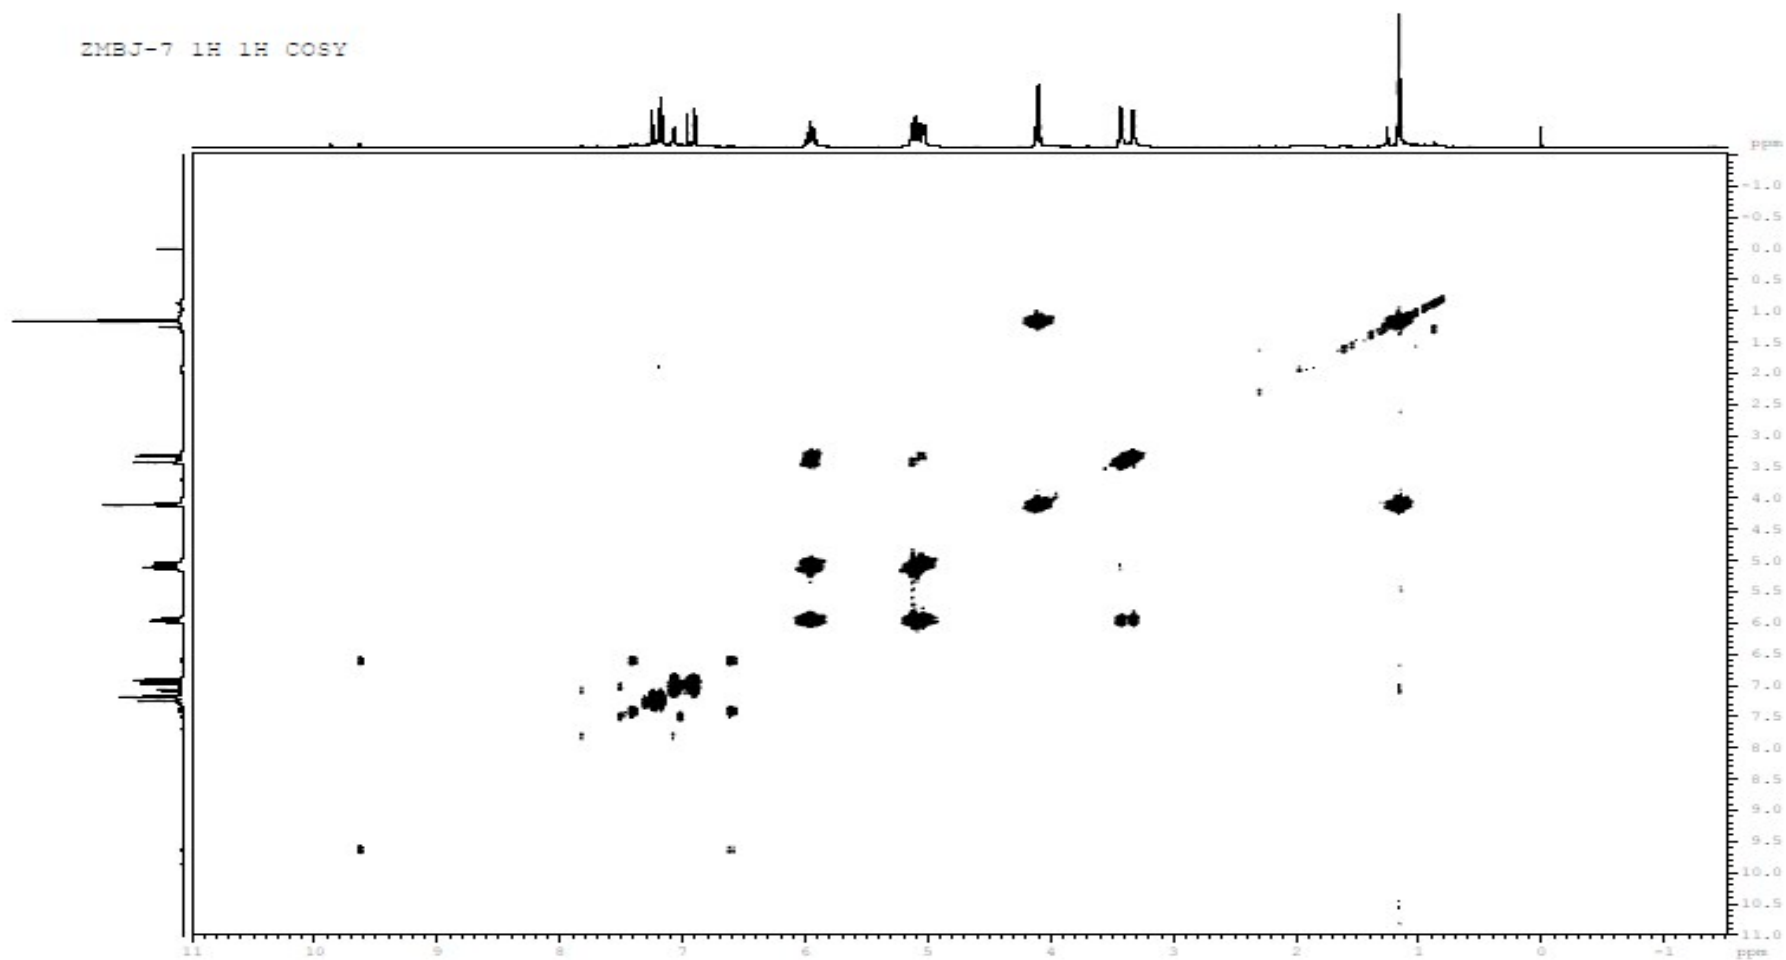

**Figure S45** HSQC NMR spectrum of compound **5** (500 MHz, CDCl<sub>3</sub>)

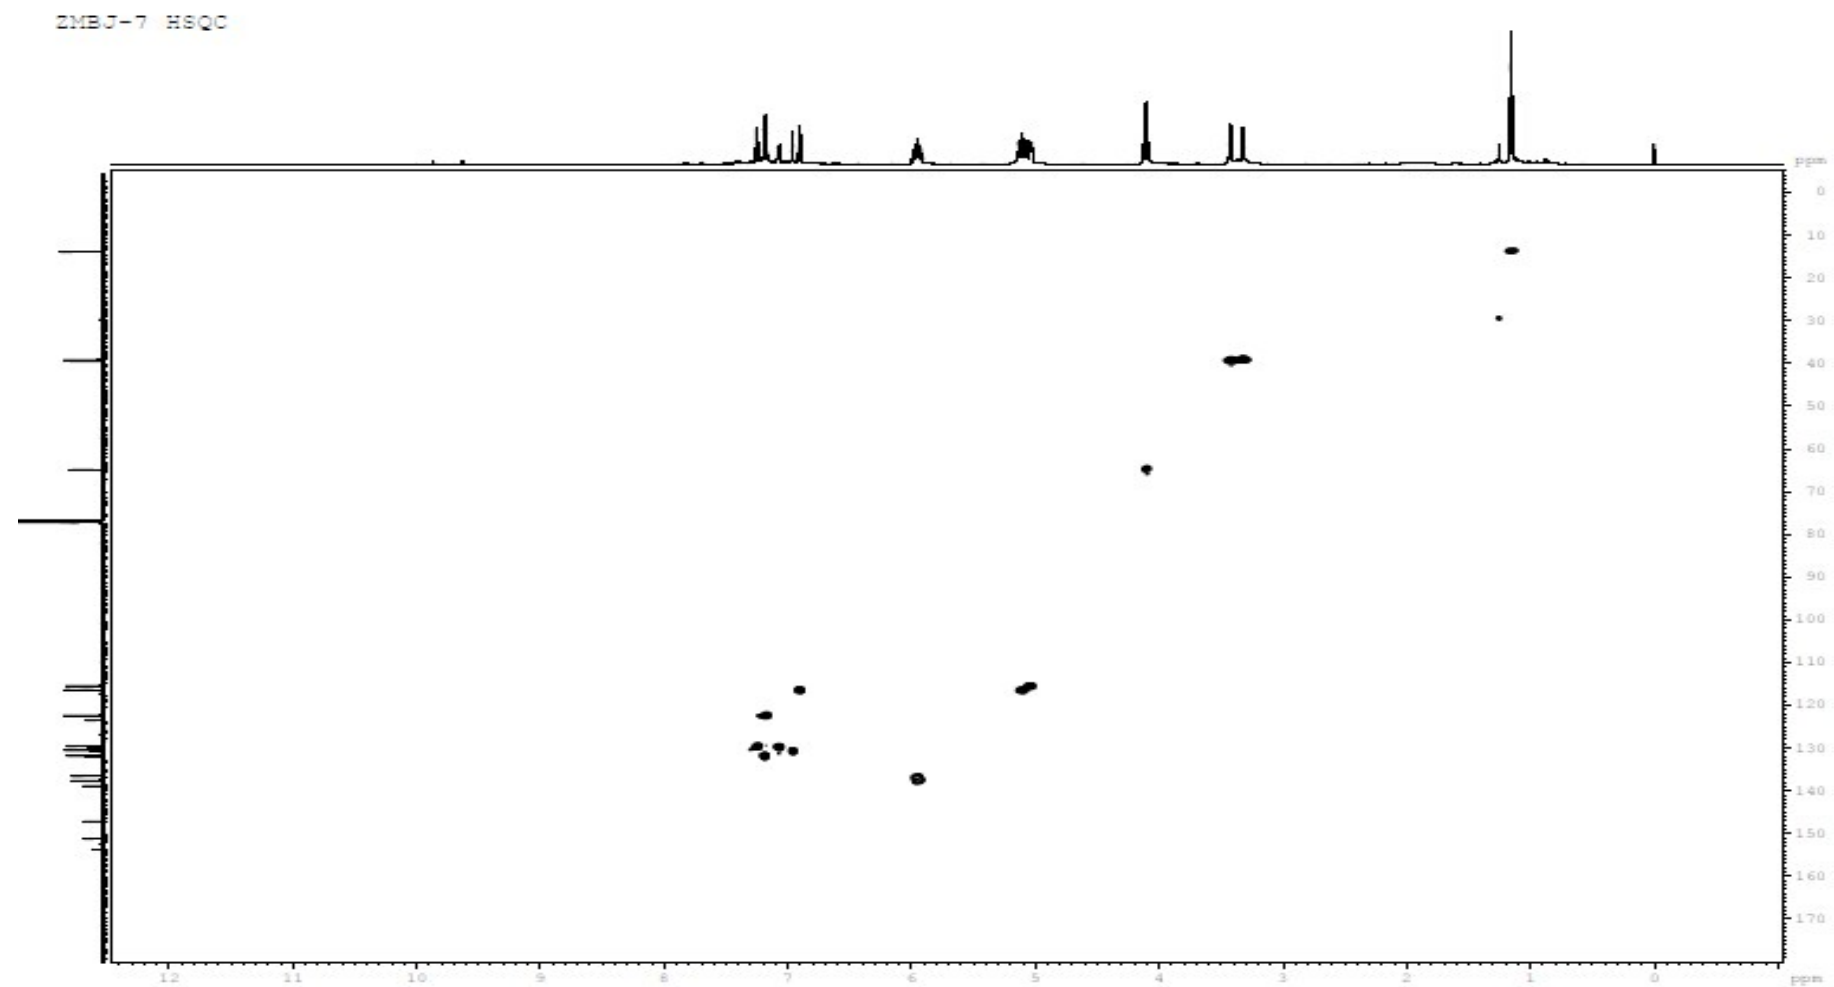



**Figure S46** HMBC NMR spectrum of compound **5** (500 MHz, CDCl<sub>3</sub>)

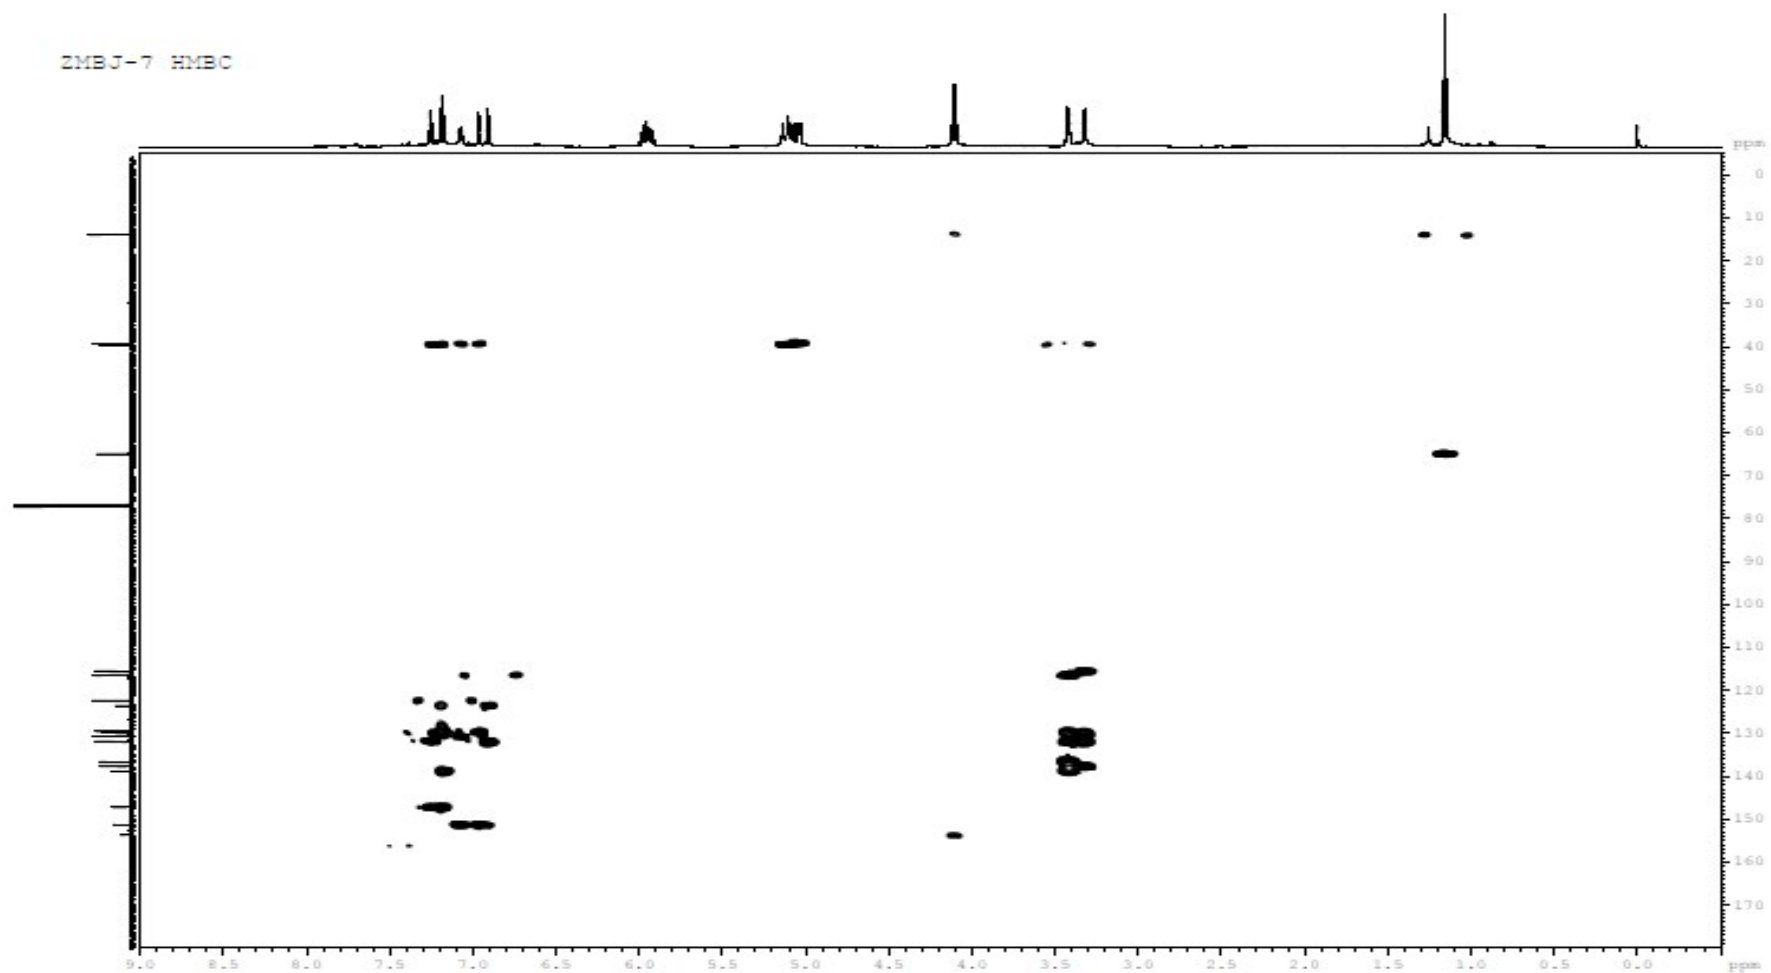

**Figure S47** NOESY NMR spectrum of compound **5** (500 MHz,  $\text{CDCl}_3$ )

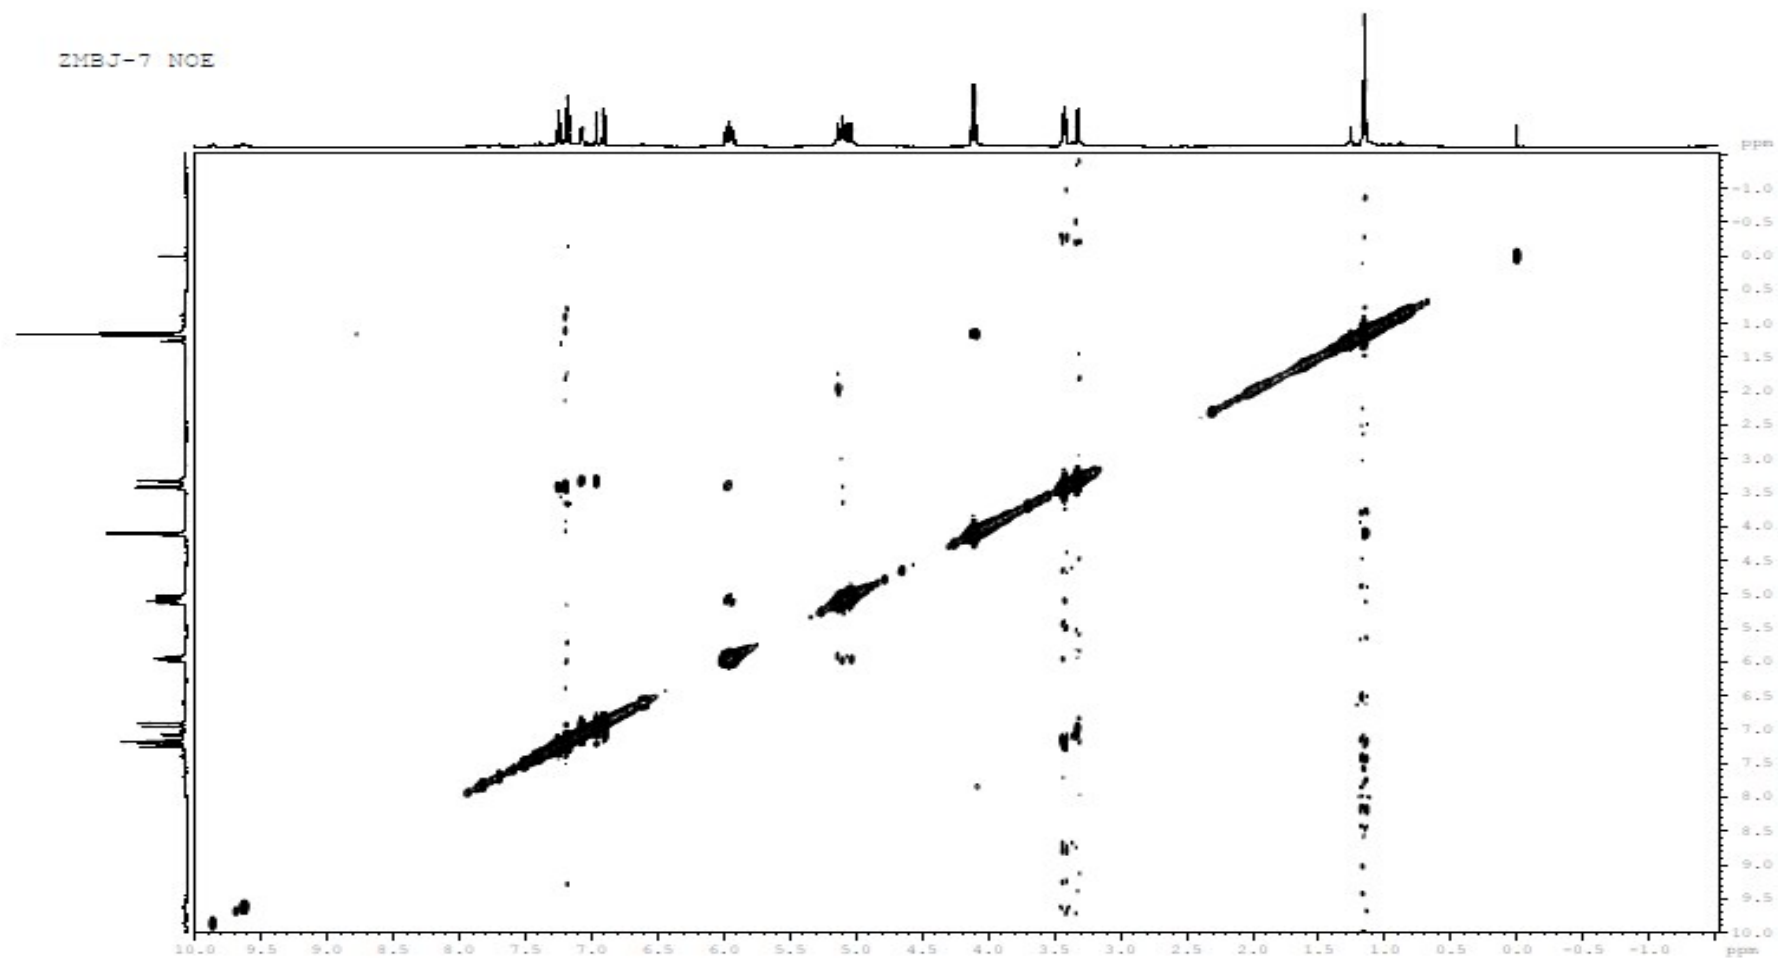

**Figure S48** ESIMS spectrum of compound 7

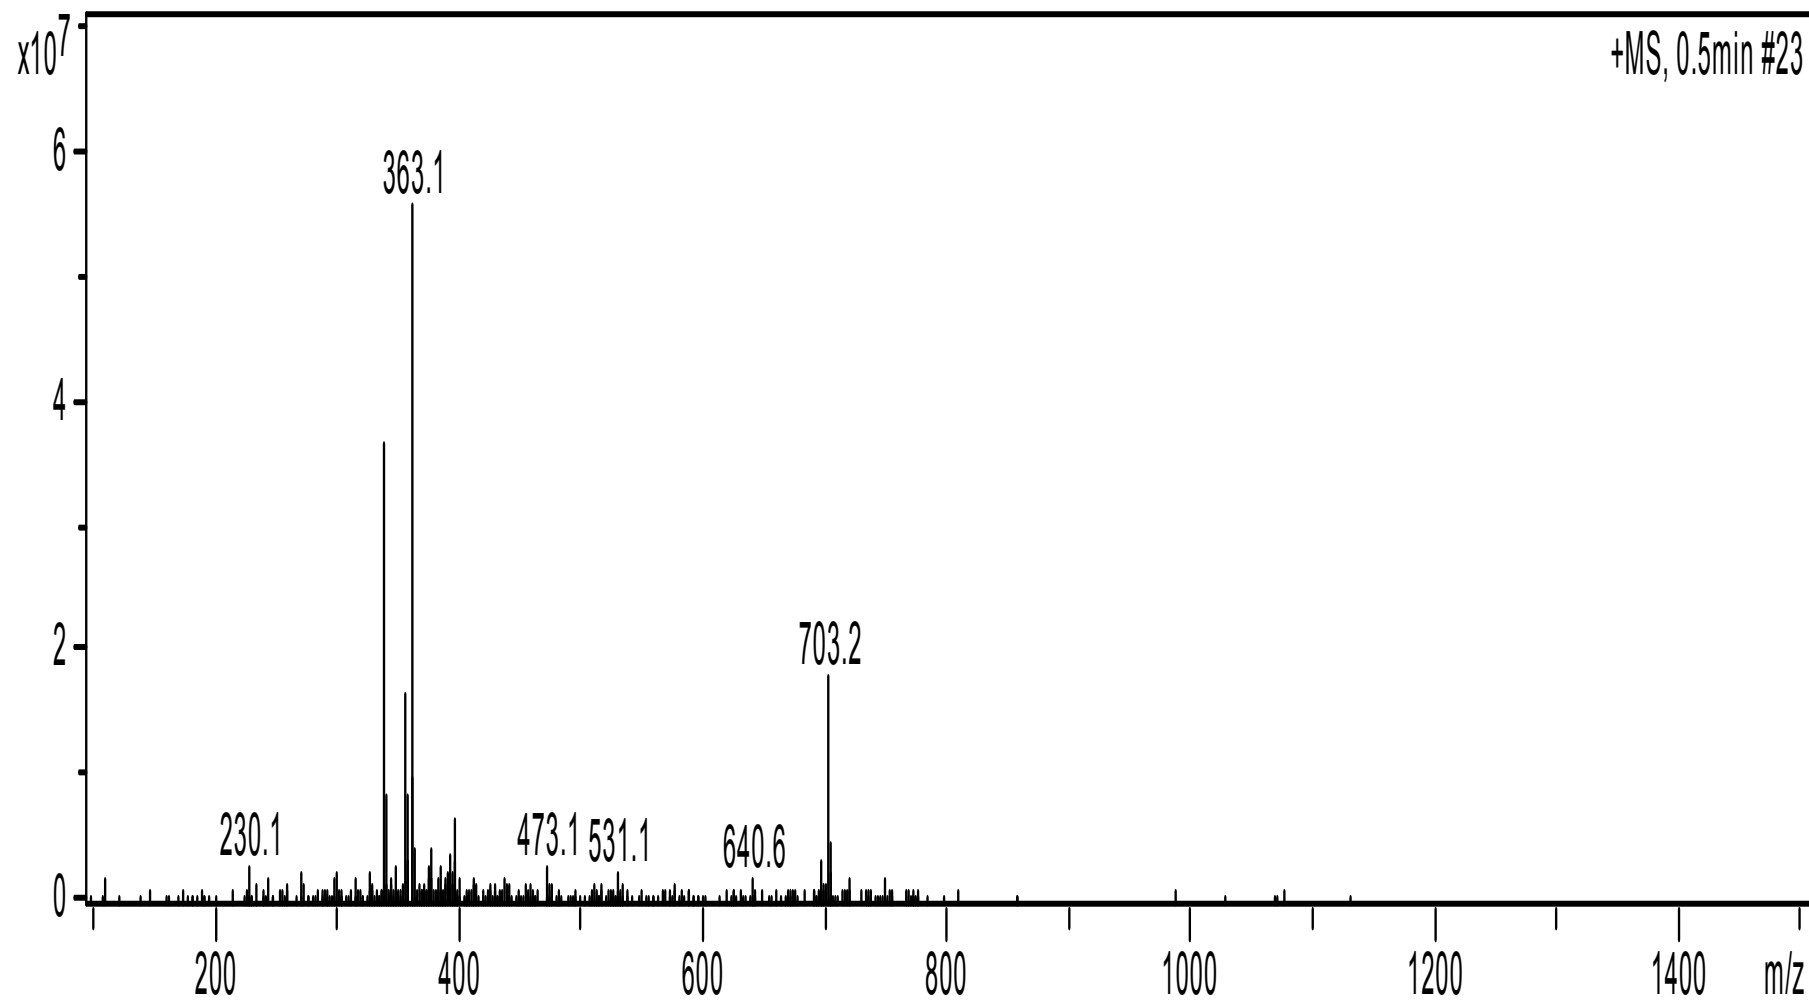

**Figure S49**  $^1\text{H}$  NMR spectrum of compound **7**

HL-IM-2 HNMR

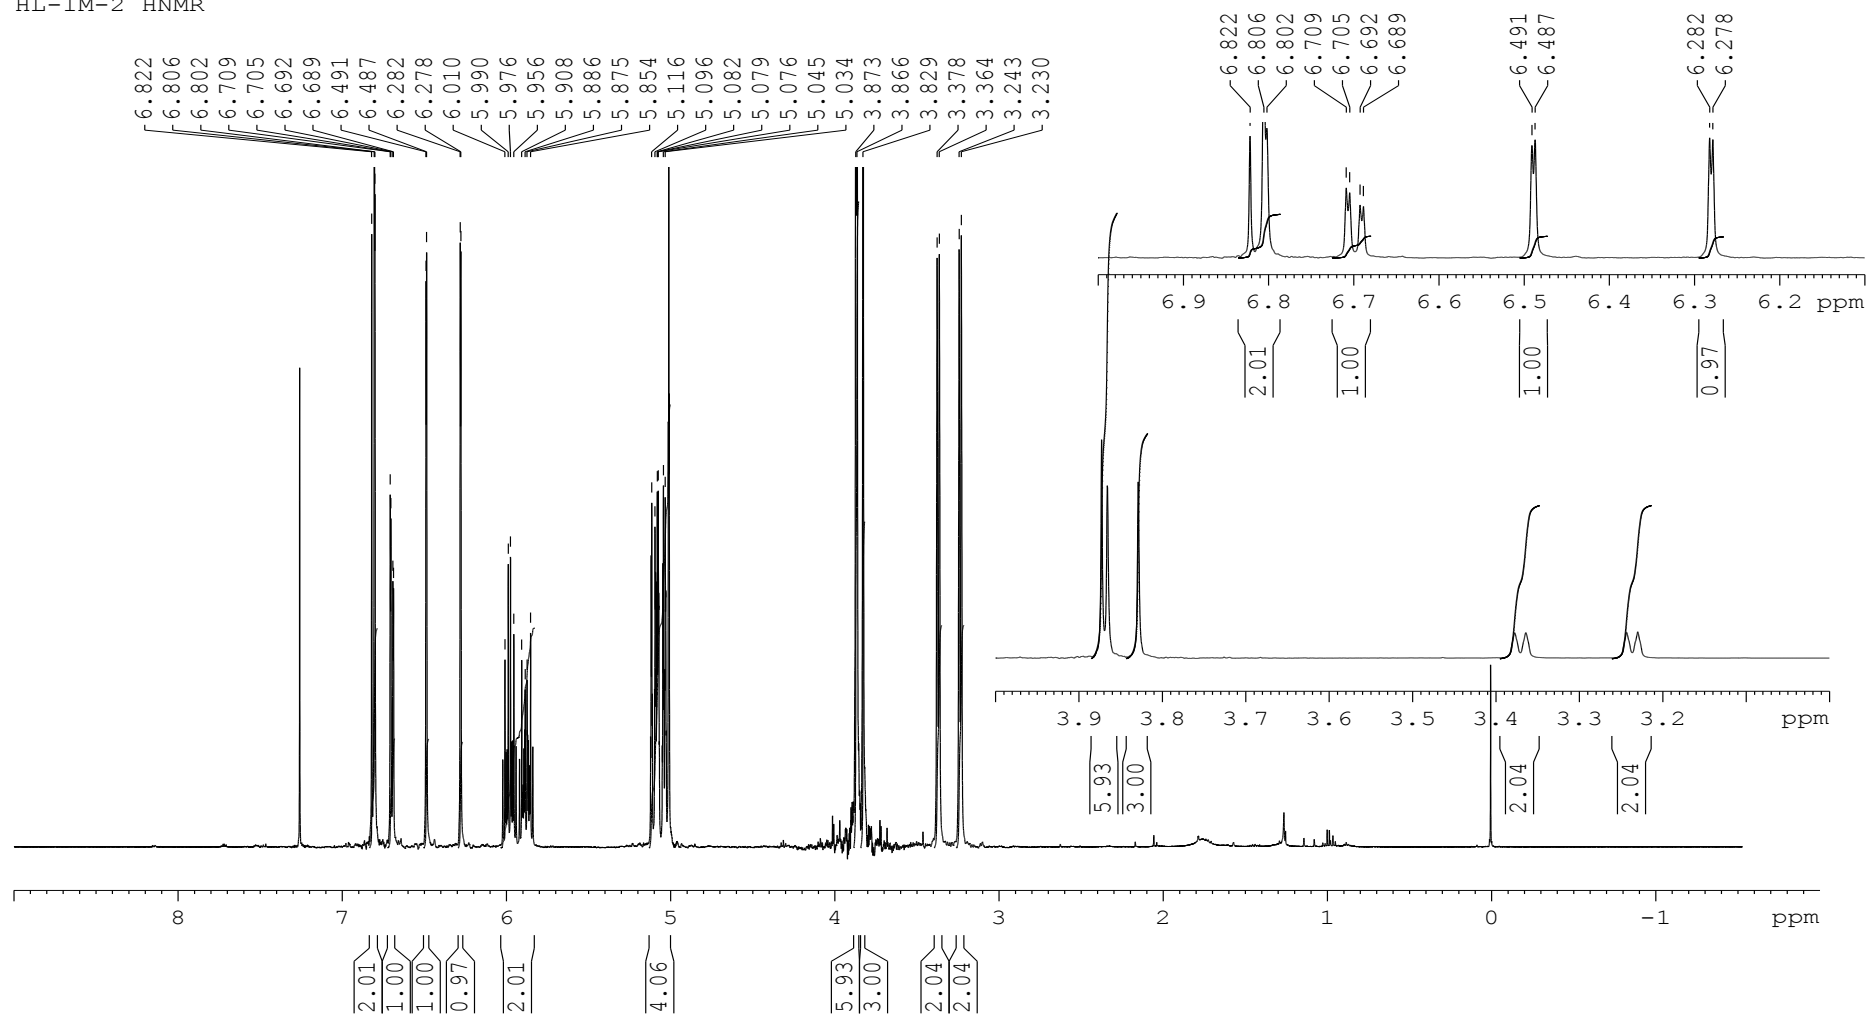

**Figure S50**  $^{13}\text{C}$  NMR spectrum of compound **7**

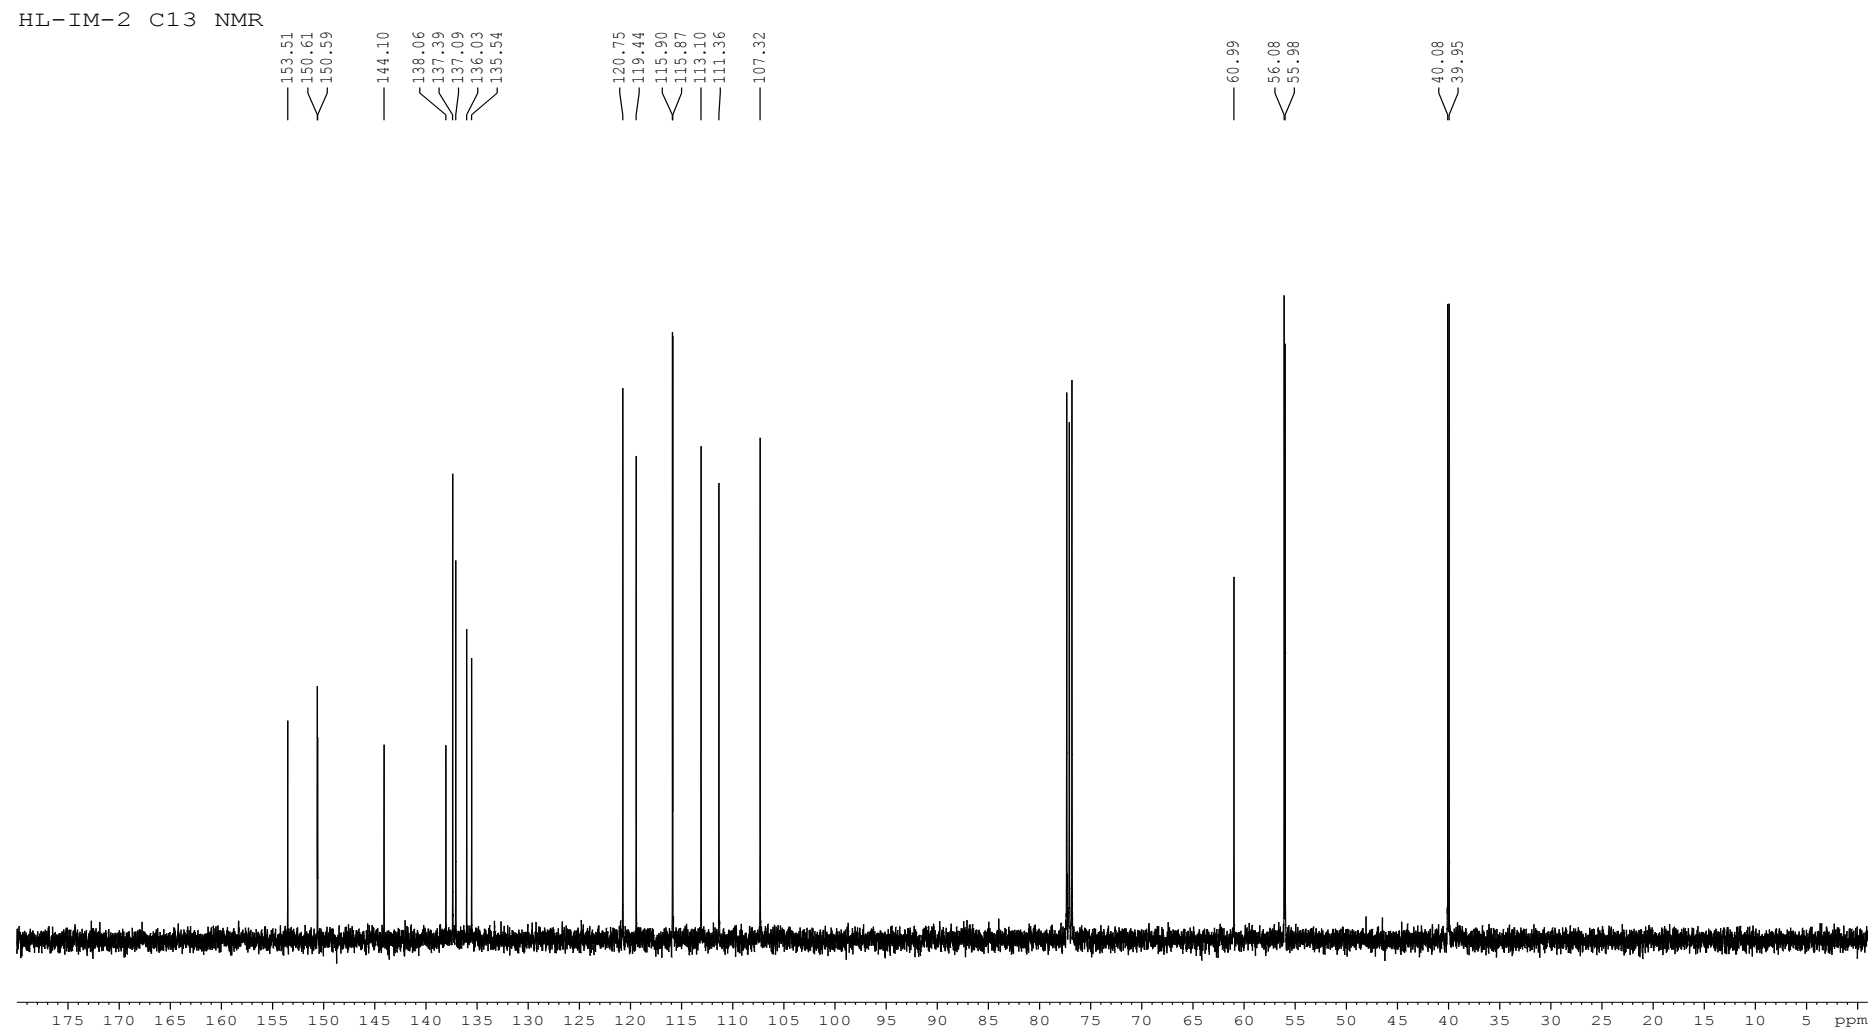

**Figure S51** DEPT spectrum of compound **7**

HL-IM-2 DEPT135

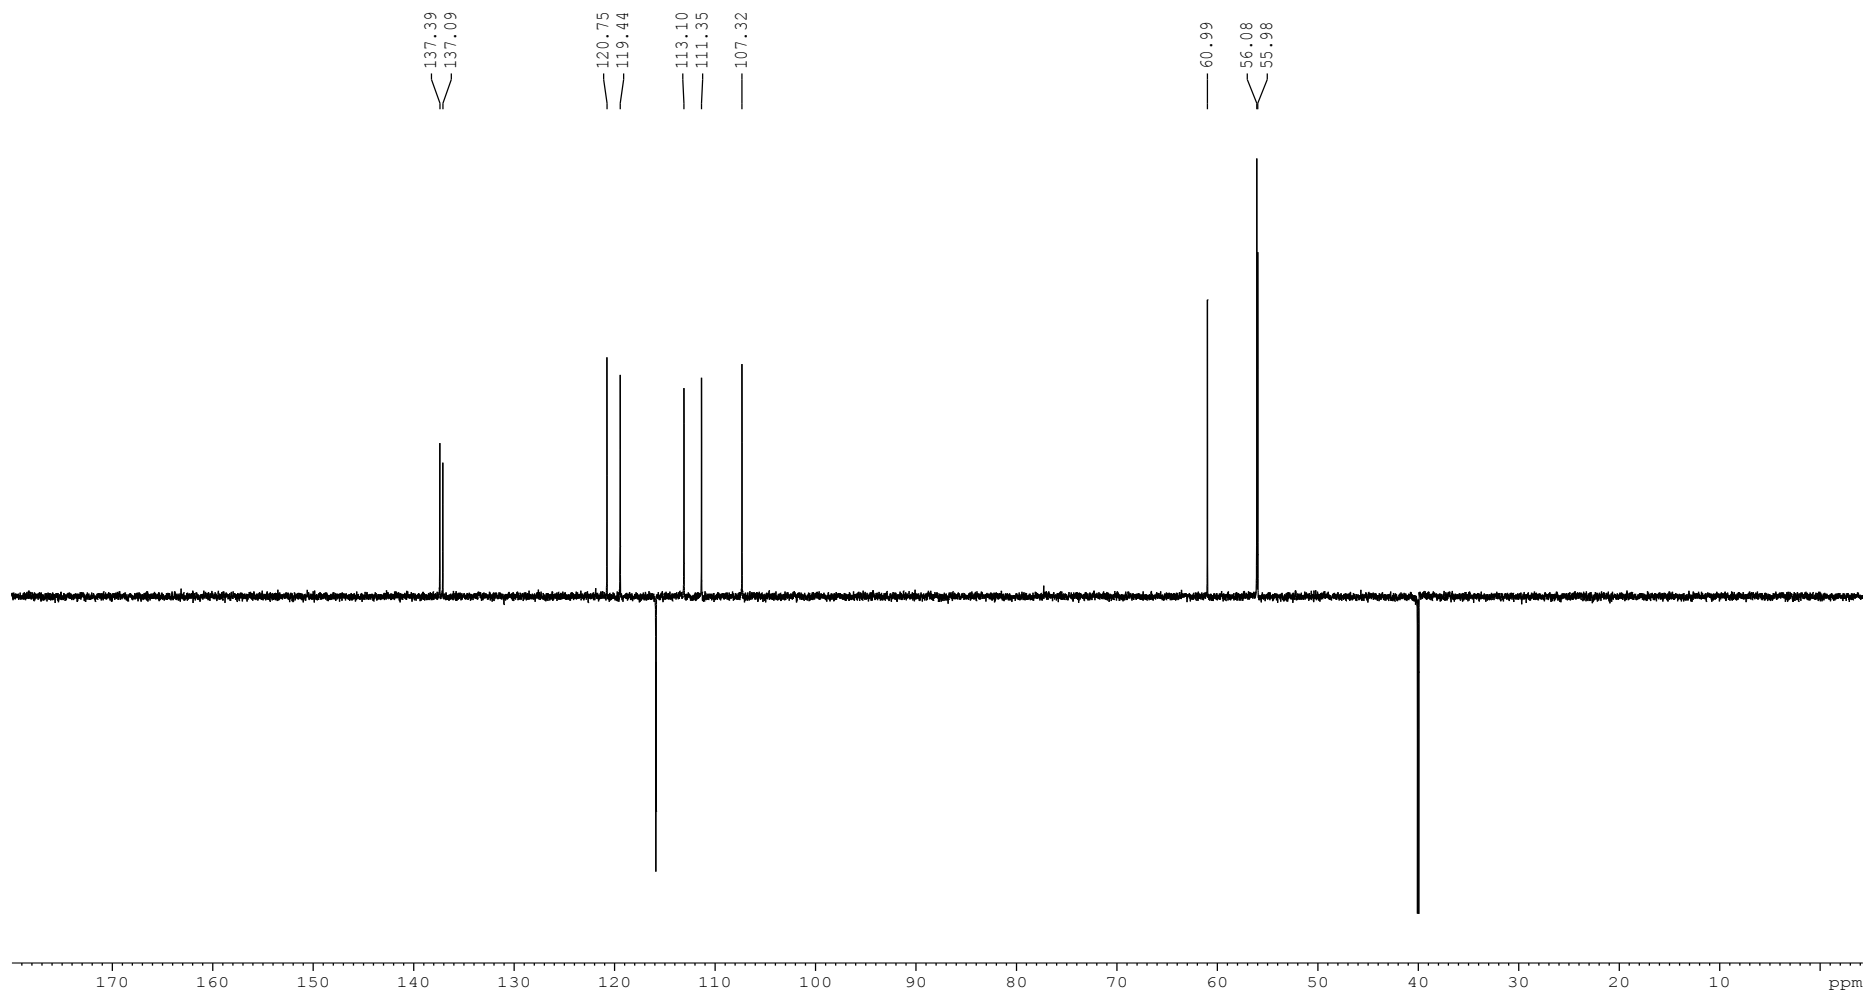

**Figure S52** HSQC spectrum of compound **7**

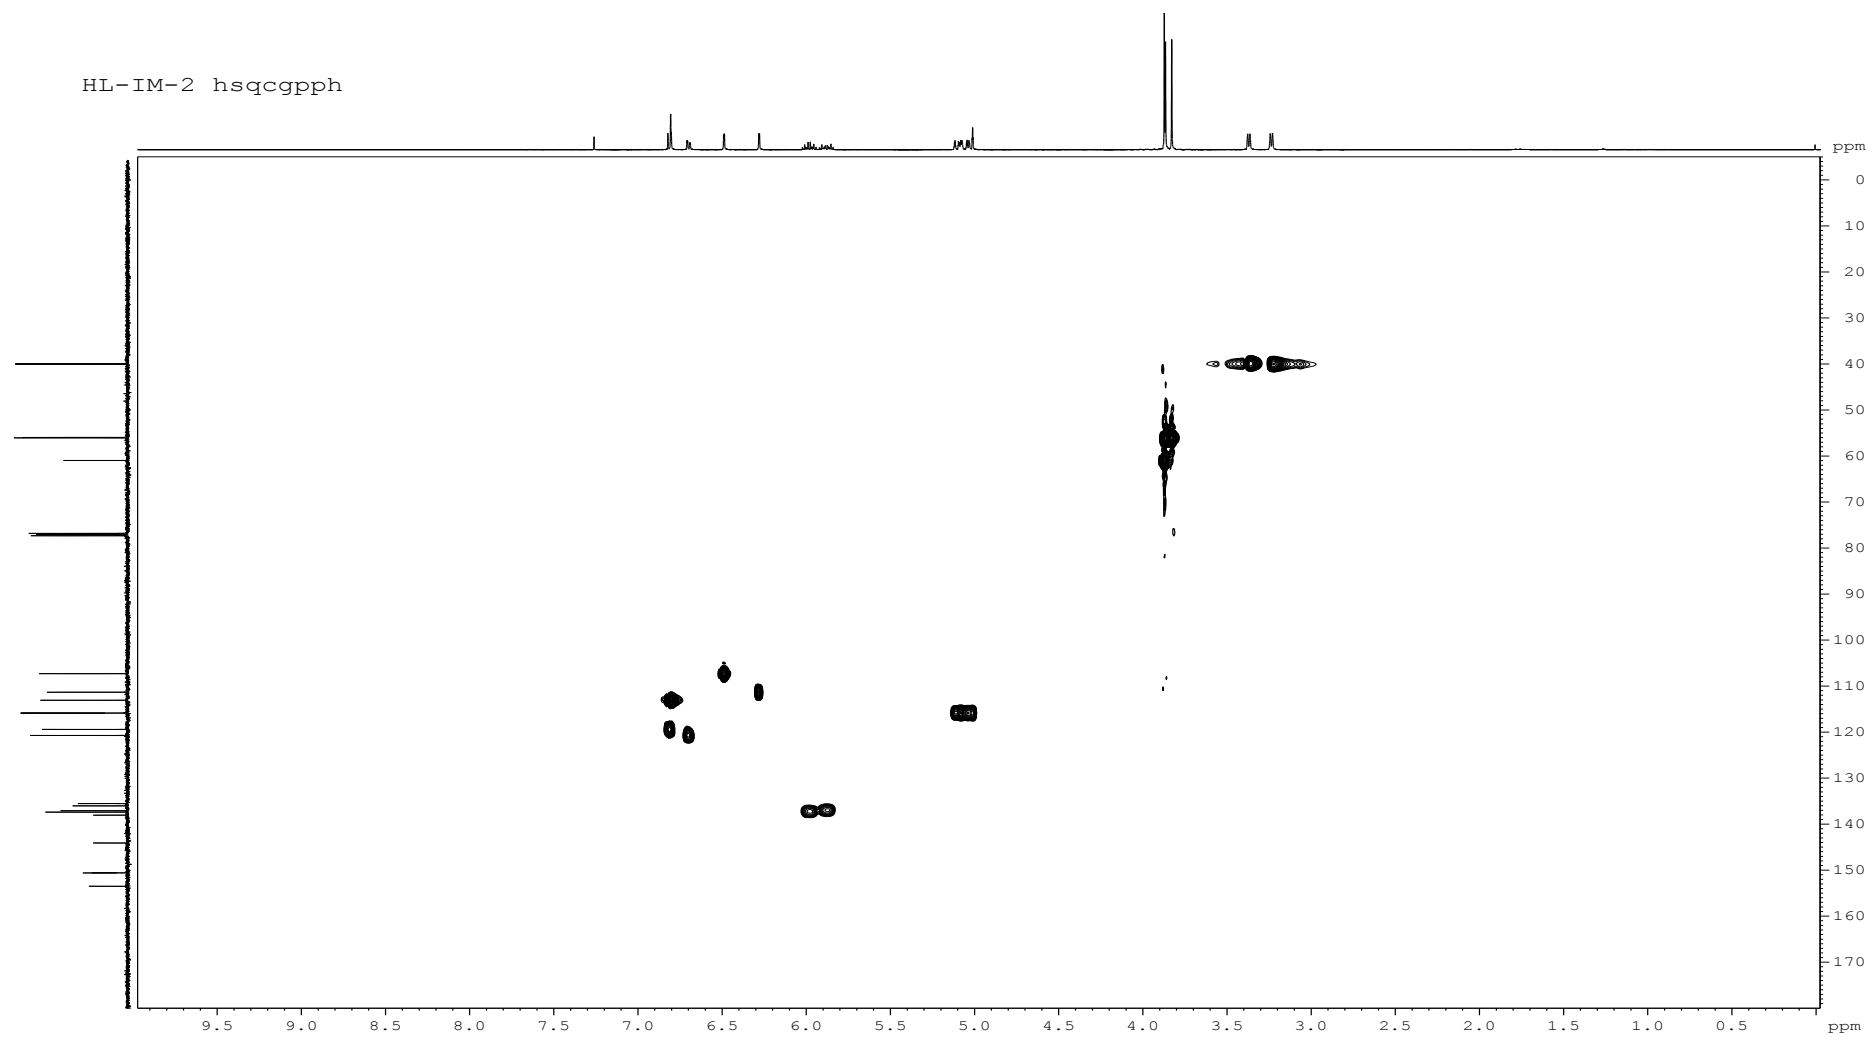

**Figure S53** HMBC spectrum of compound 7

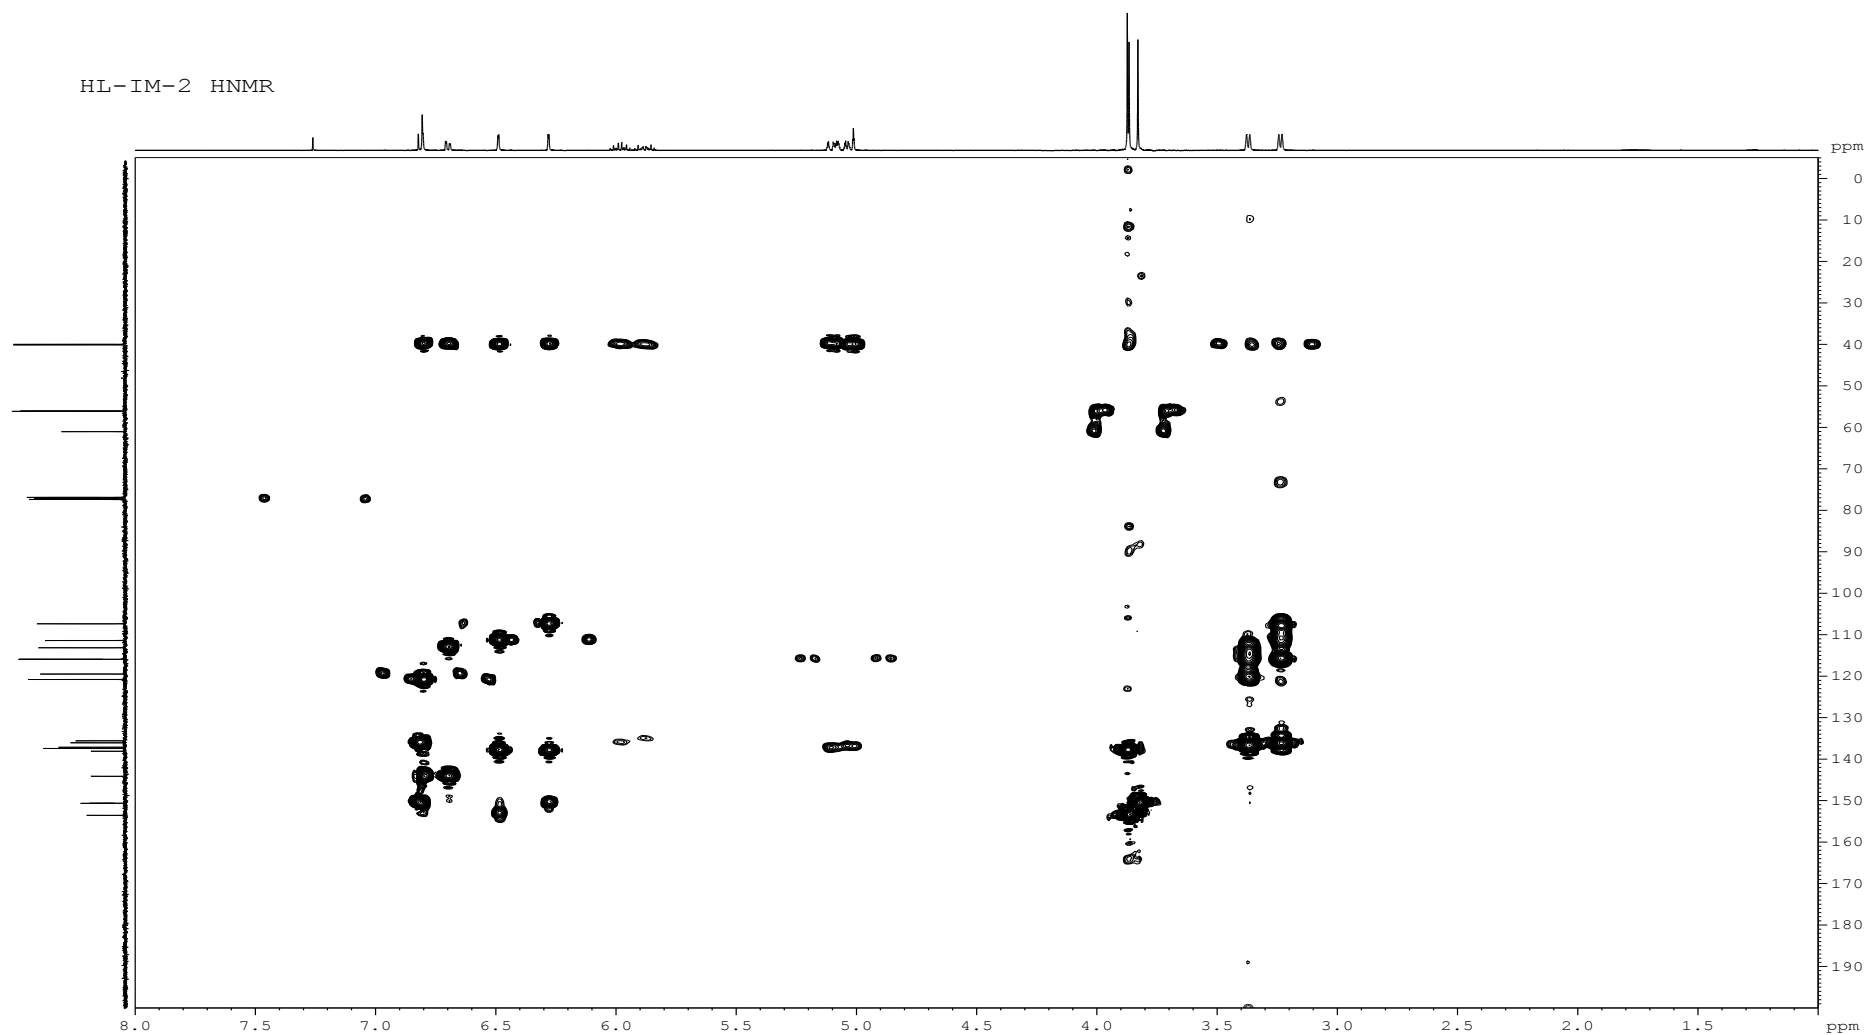



**Figure S54** NOESY spectrum of compound 7

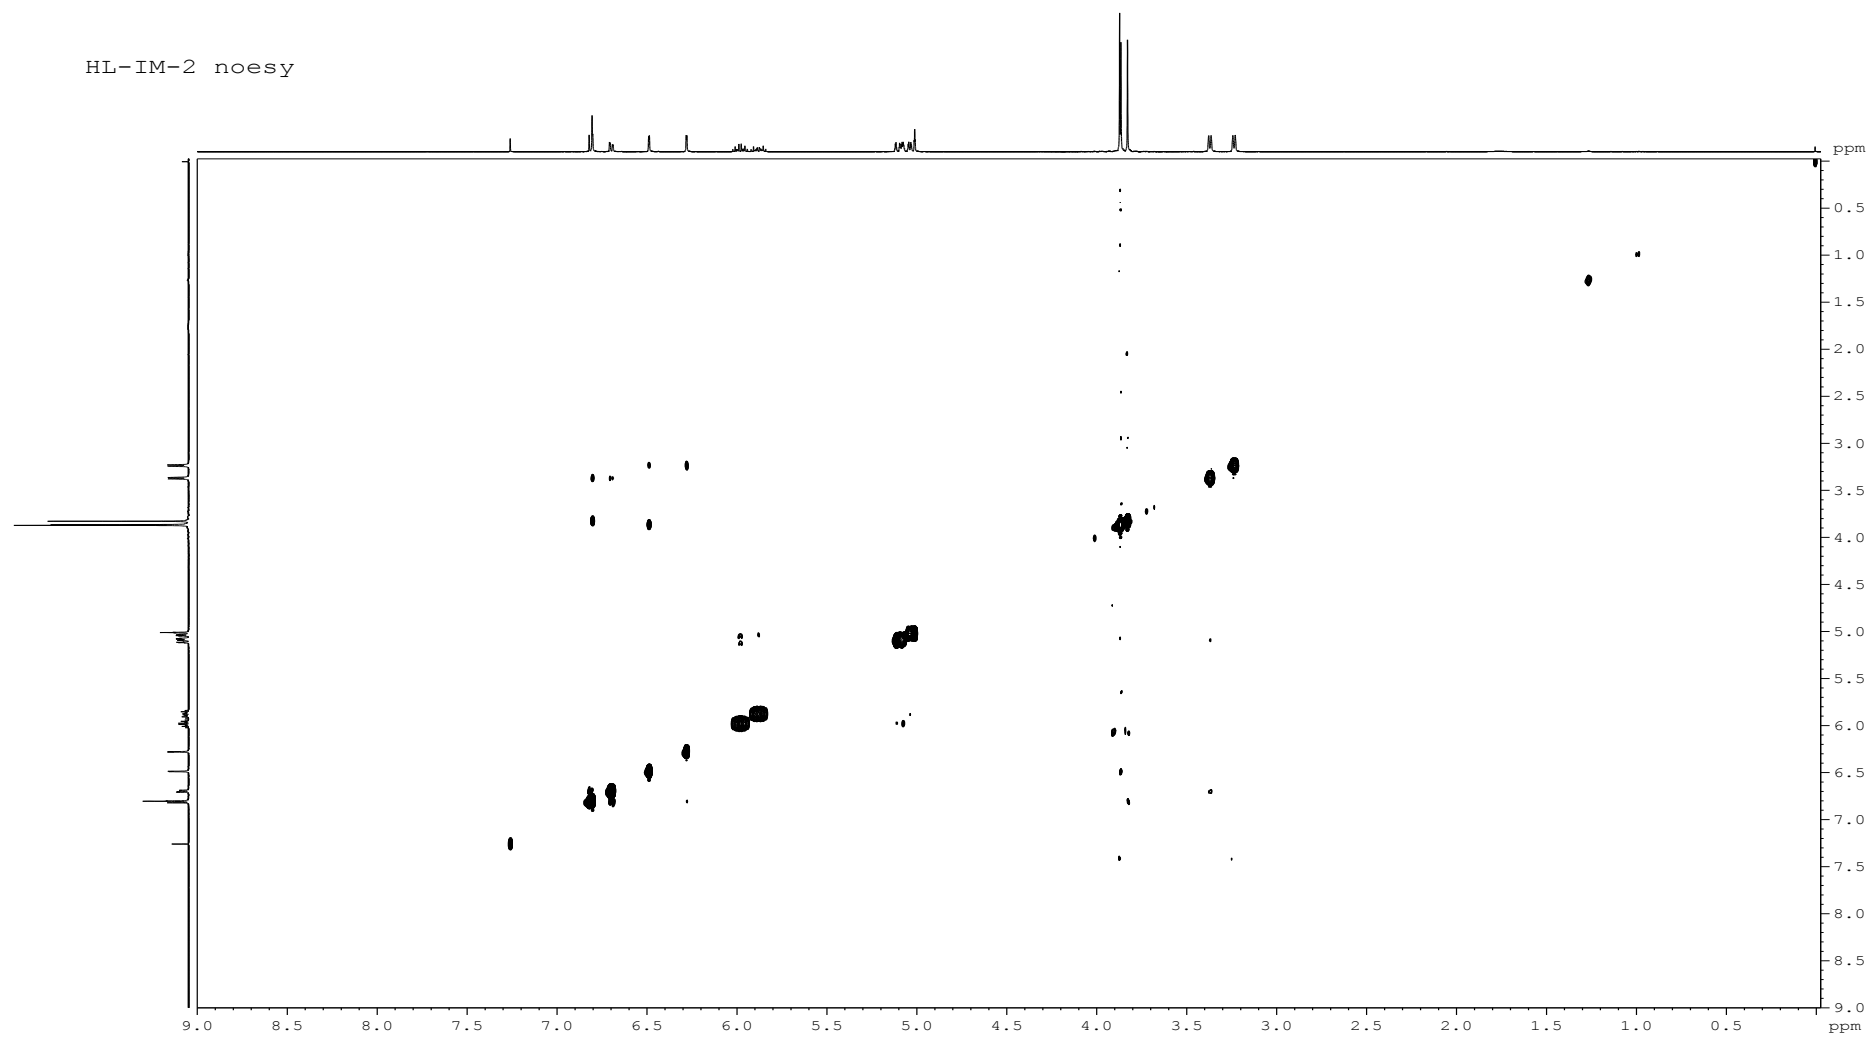

## Experimental Section

To prove whether compounds **3** and **5** were ethoxy artifacts or not, we ran the HPLC, and LC-MS of the methanol extract of *Illicium burmanicum* and compounds **3** and **5**. The results indicated that compounds **3** and **5** could be detected from the HPLC spectrum (**Fig. S55**), and from the extracted ion chromatogram of the extract (**Fig. S56 and S57**), indicating that compounds **3** and **5** should be natural products, rather than artifacts.

The experimental details are as follows: Chromatographically pure reagents acetonitrile and methanol were obtained from Fisher Scientific Co. (Nepean, Ont., Canada); Water was purified by a Milli-Q system (Millipore, MA, USA). Air-dried branches and leaves of *I. burmanicum* (10 g) were powdered and extracted with methanol (100 mL) three times (0.5 h) under condition of reflux. The solvent was removed under low pressure to afford a crude extract (680 mg), which was then dissolved in acetonitrile and filtered through a syringe filter (0.22  $\mu$ m). A total of 5  $\mu$ L filtrate was subject to LC/MS system for analysis. Compounds **3** and **5** were also dissolved in acetonitrile for analysis. LC-MS was run on an Agilent 1100 Series LC/MSD Trap XCT with an ESI ion source (Agilent Technologies, Santa Clara, CA, USA). Samples were separated on an XTerra-MS-C<sub>18</sub> (4.6  $\times$  250 mm, 5  $\mu$ m, Waters, Milford, USA) at 25 °C. Water (A) and acetonitrile (B) were used as the mobile phase: 0–60 min, 20–100 % B at a flow rate of 0.8 mL/min. ESI-MS conditions: carrier gas N<sub>2</sub>, capillary temperature 350 °C, gas flow 12 L/min, capillary voltage 3500 V, nebulizer pressure 45 psi, positive scan mode ( $m/z$  100–1000).

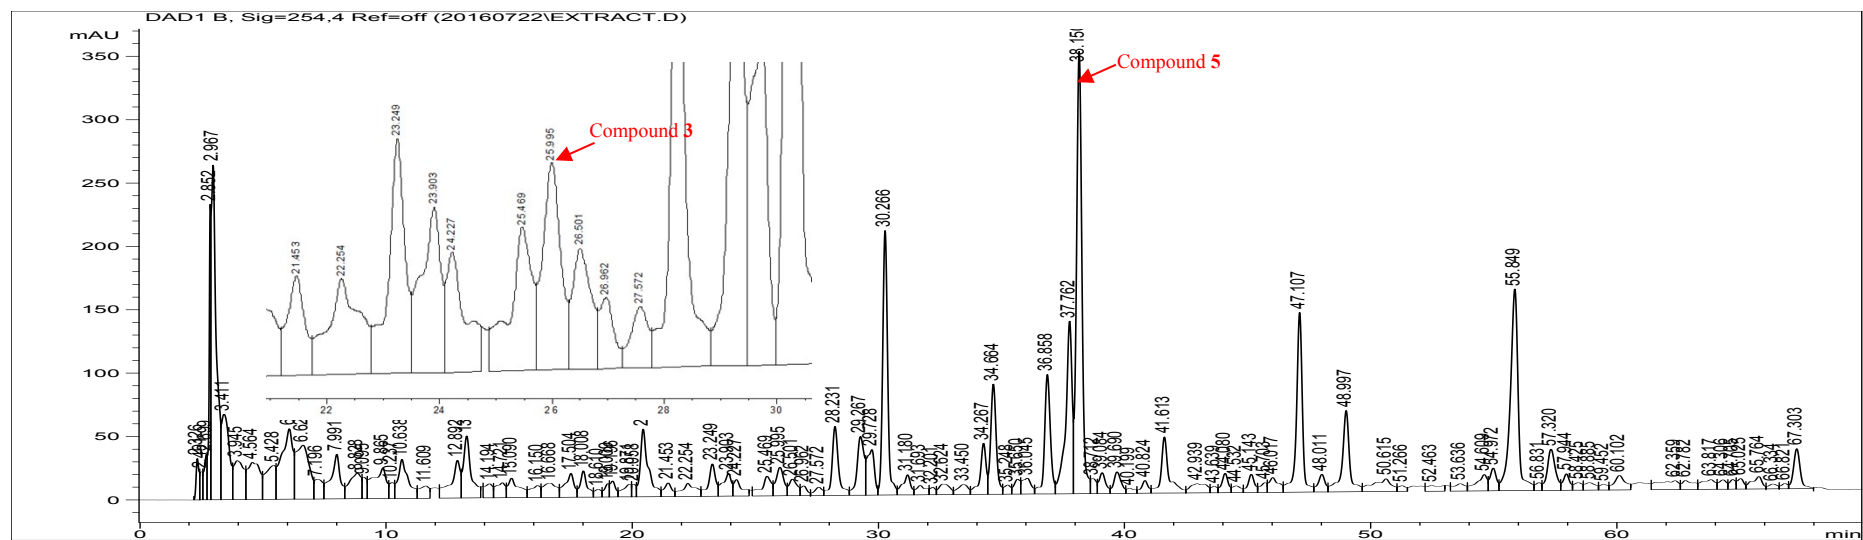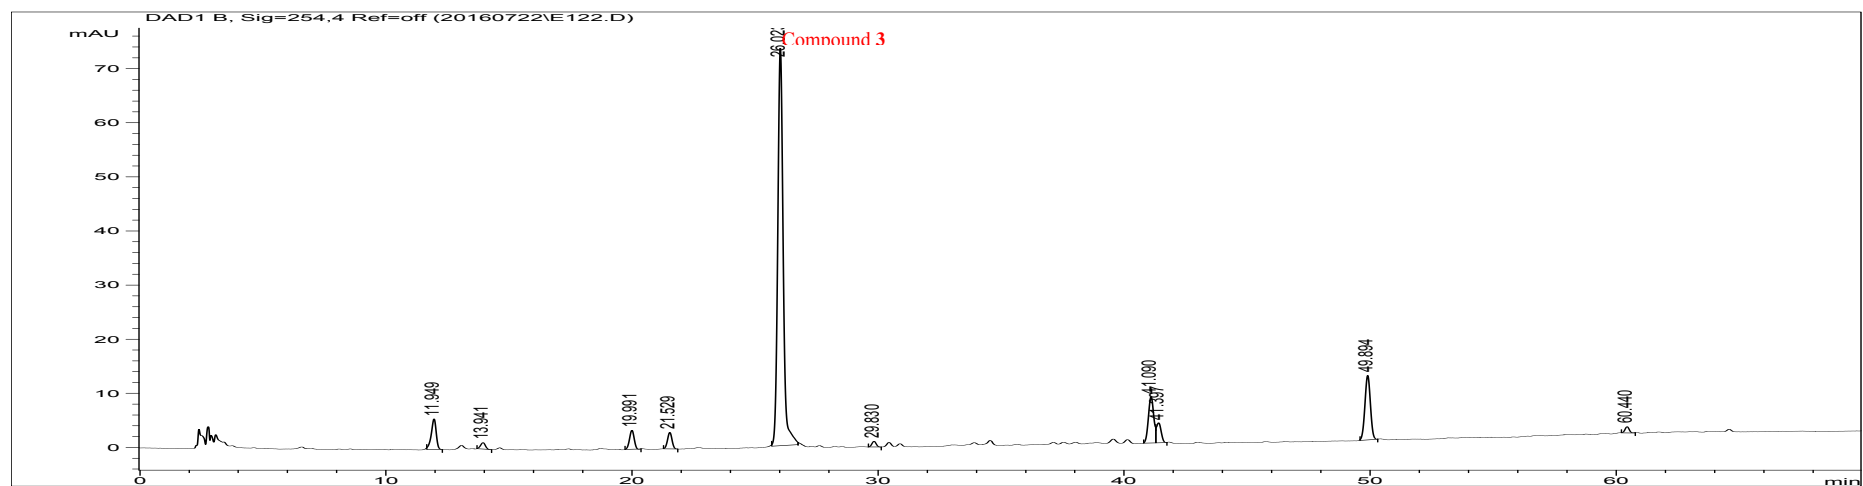

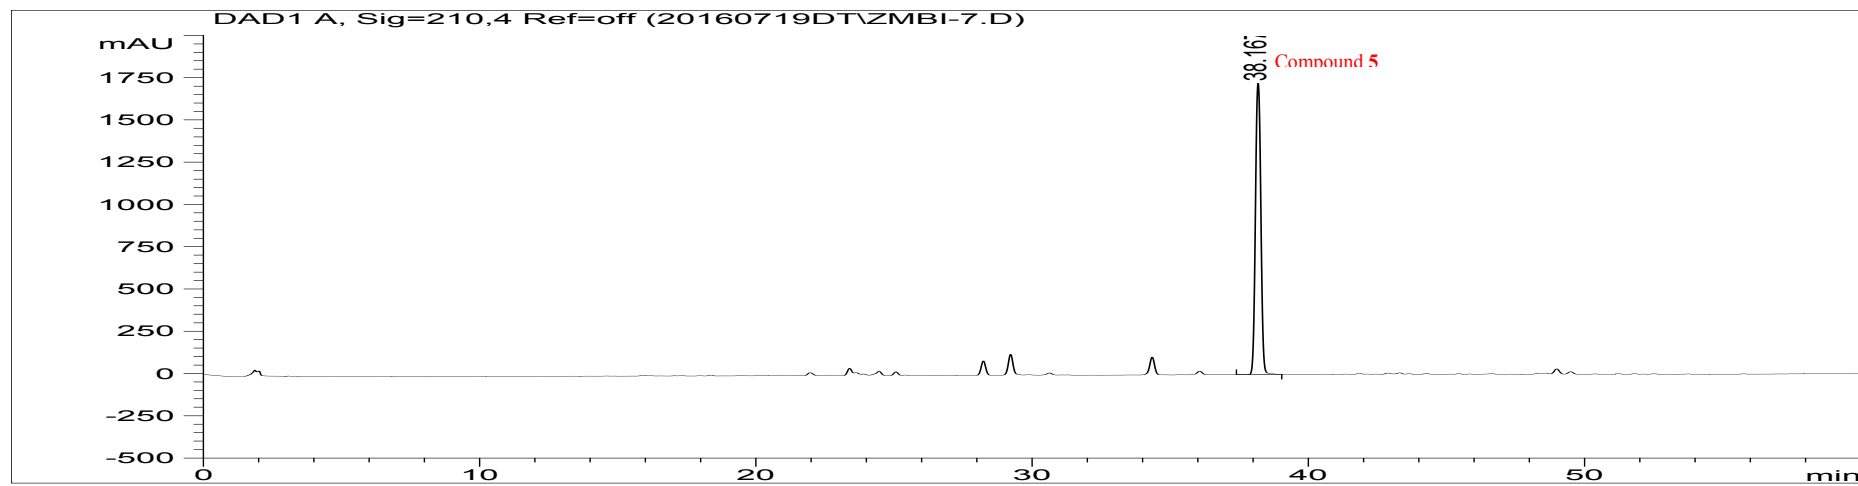

**Figure S55** HPLC spectrum of the extract, compounds **3** ( $t_R = 26.0$  min) and **5** ( $t_R = 38.2$  min).

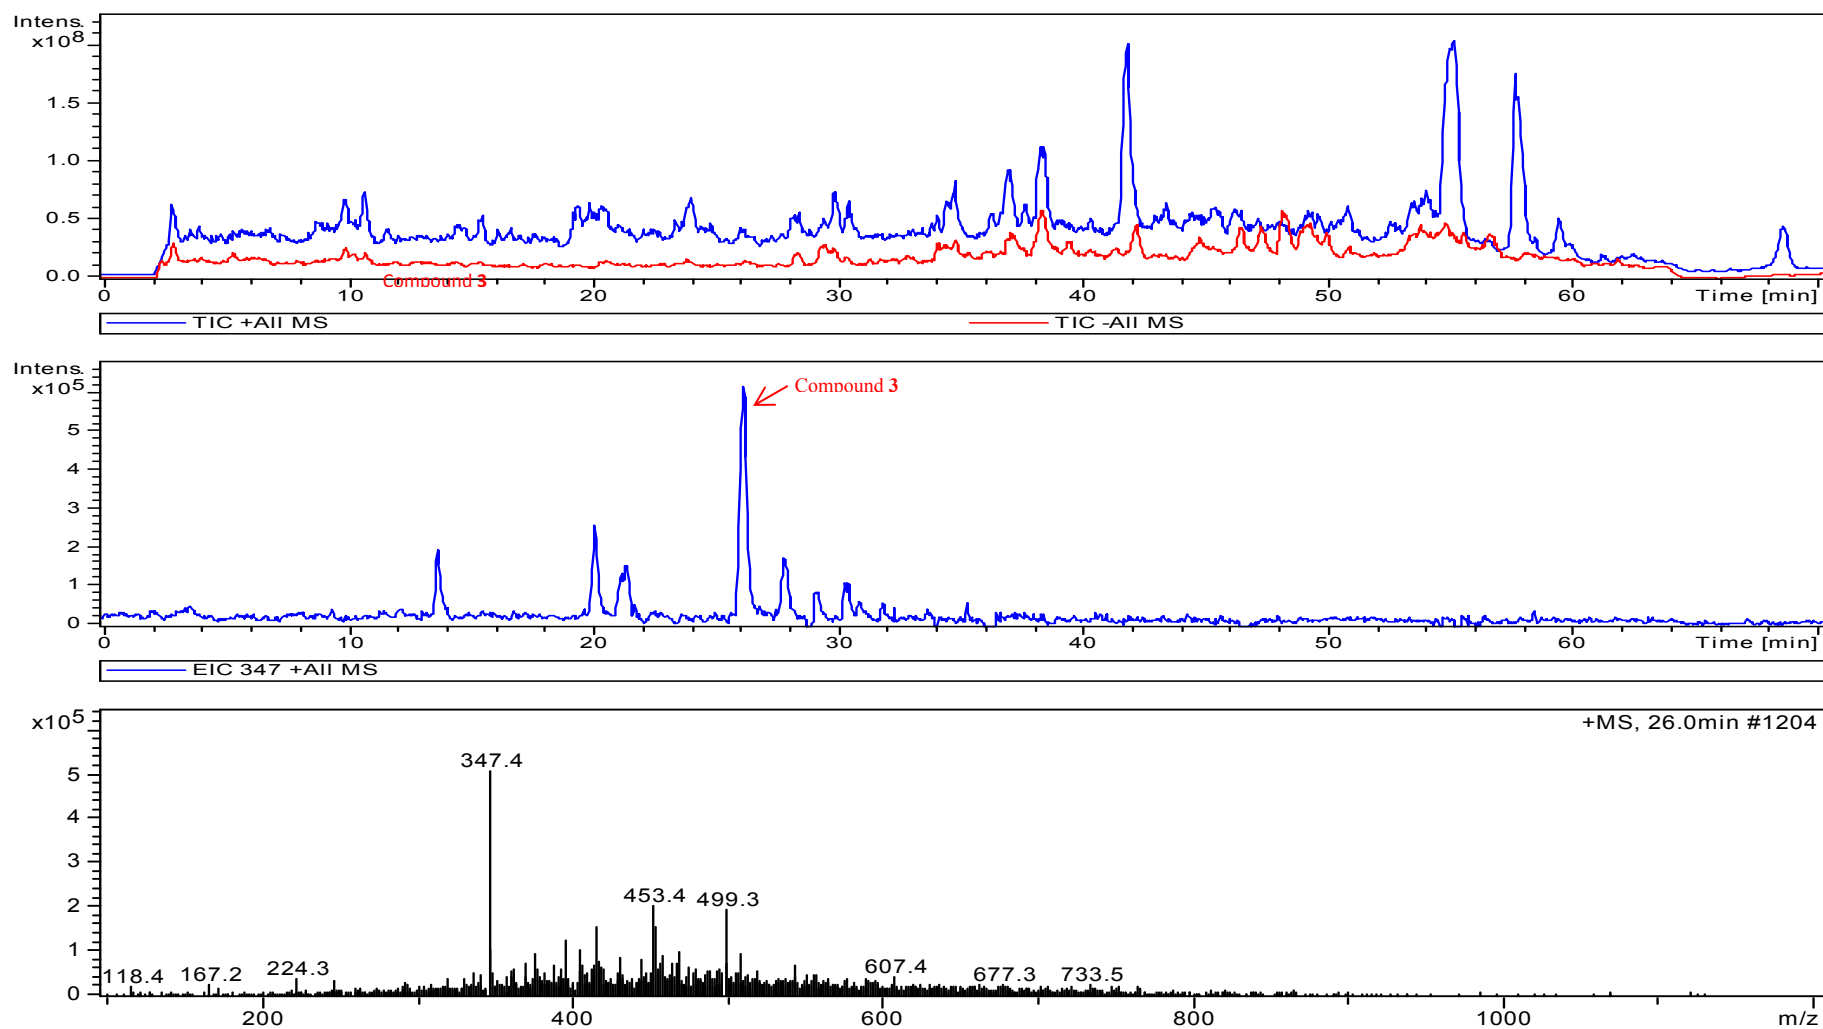

**Figure S56** Base peak and extracted ion chromatogram of the methanol extract at 26.0 min (Compound **3**:  $m/z = 347$   $[M + Na]^+$ ).

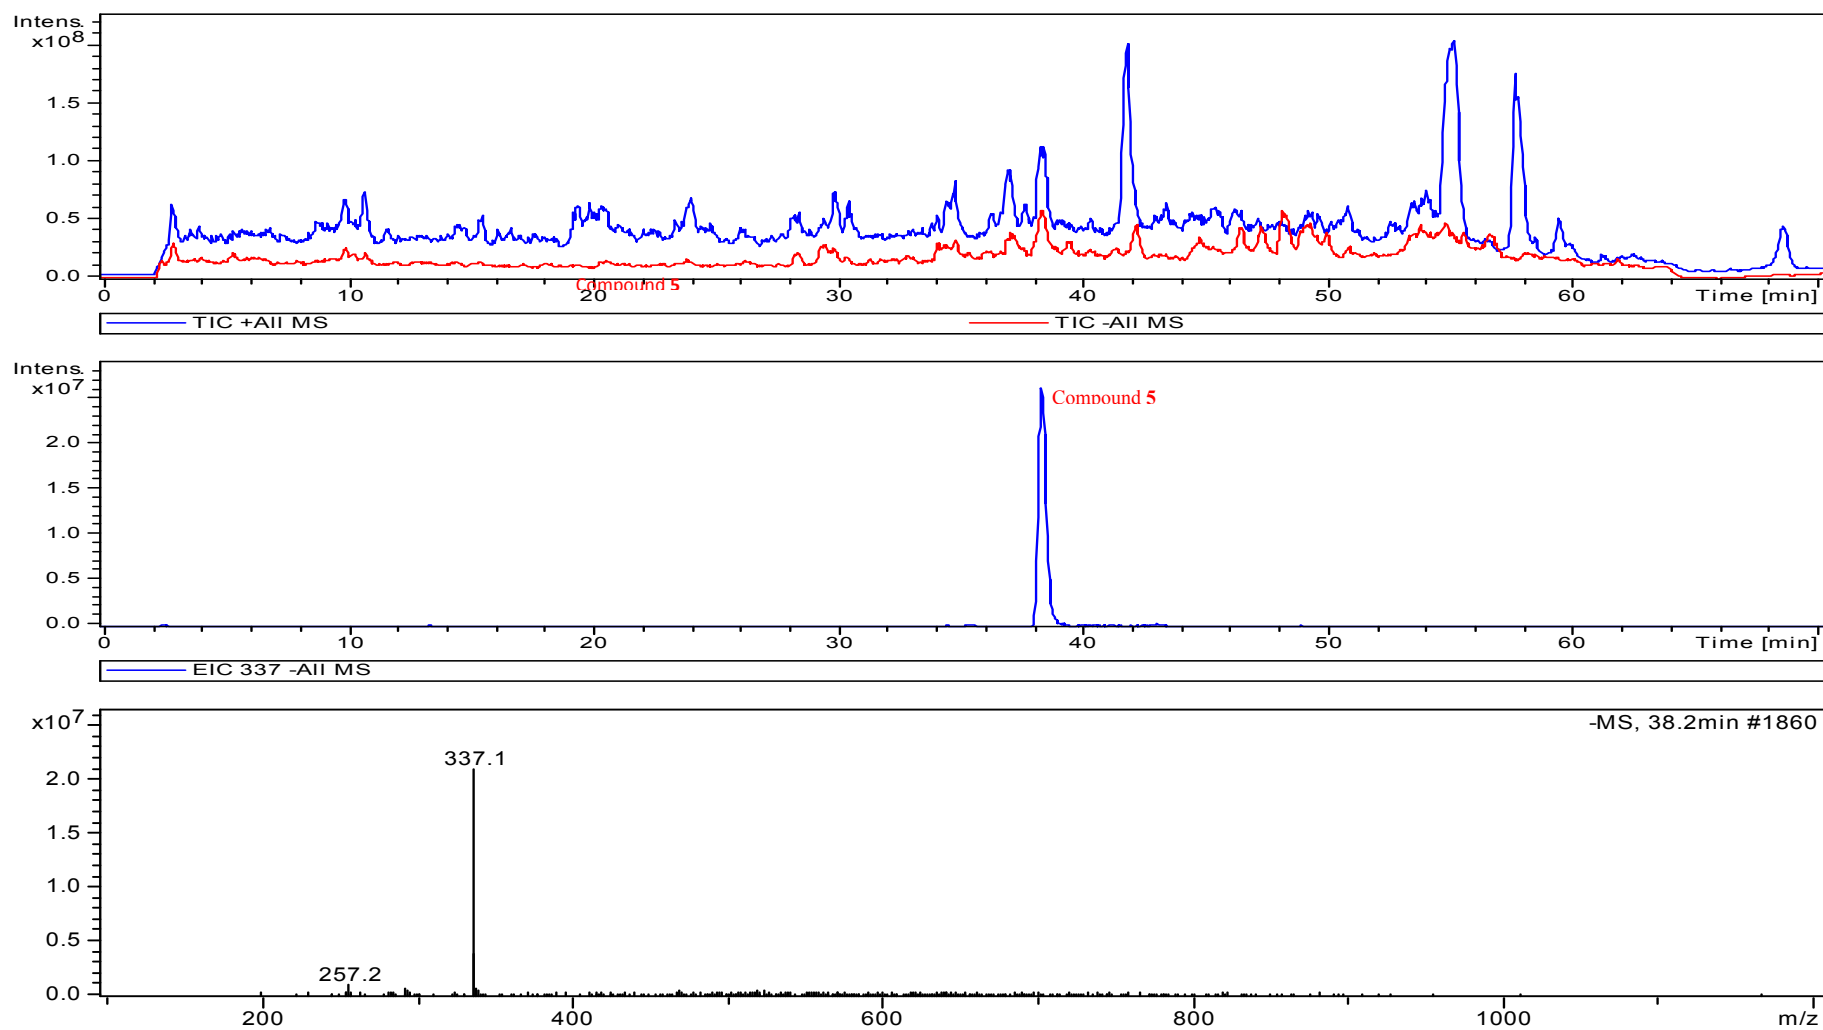

**Figure S57** Base peak and extracted ion chromatogram of the methanol extract at 38.2 min (Compound **5**:  $m/z = 337$   $[M - H]^-$ ).
